# Supplementary material
Source: PubMed Central journal article supplement (PMC2586666)

**Synthesis of 2,3-Disubstituted Benzo[*b*]furans by the Palladium-Catalyzed Coupling  
of *o*-Iodoanisoles and Terminal Alkynes, Followed by Electrophilic Cyclization**

Dawei Yue, Tuanli Yao and Richard C. Larock\*

*Department of Chemistry, Iowa State University, Ames, IA 50011*

*larock@iastate.edu*

|                                                                                                                      | <b>Page</b> |
|----------------------------------------------------------------------------------------------------------------------|-------------|
| General                                                                                                              | S2-S2       |
| Preparation of <i>o</i> -(1-alkynyl)anisoles                                                                         | S2-S7       |
| Iodocyclization of <i>o</i> -(1-alkynyl)anisoles                                                                     | S7-S10      |
| <i>p</i> -O <sub>2</sub> NC <sub>6</sub> H <sub>4</sub> SCl and PhSeCl cyclizations of <i>o</i> -(1-alkynyl)anisoles | S10-S11     |
| References                                                                                                           | S11-S12     |
| Copies of <sup>1</sup> H and <sup>13</sup> C NMR spectra                                                             | S13-S72     |

**General.**  $^1\text{H}$  and  $^{13}\text{C}$  NMR spectra were recorded at 300 and 75.5 MHz or 400 and 100 MHz respectively. Thin layer chromatography was performed using commercially prepared 60-mesh silica gel plates, and visualization was effected with short wavelength UV light (254 nm) or a basic  $\text{KMnO}_4$  solution [3 g of  $\text{KMnO}_4$  + 20 g of  $\text{K}_2\text{CO}_3$  + 5 mL of  $\text{NaOH}$  (5 %) + 300 mL of  $\text{H}_2\text{O}$ ]. All melting points are uncorrected. Low resolution mass spectra were recorded on a Finnigan TSQ700 triple quadrupole mass spectrometer. High resolution mass spectra were recorded on a double focusing magnetic sector mass spectrometer using EI at 70 eV. All reagents were used directly as obtained commercially unless otherwise noted. Anhydrous forms of ethyl ether, hexanes, ethyl acetate,  $\text{CH}_2\text{Cl}_2$  and DMF, 2-iodoanisole, 2-bromo-1,4-dimethoxybenzene, 1-bromo-2,4-dimethoxybenzene, 2-iodo-4-nitroanisole, 2-iodo-5-nitroanisole, resorcinol, 4-iodoanisole, 4-nitroiodobenzene, phenylacetylene, 1-decyne, 1-cyclohexenyl acetylene, 1-octyne, *tert*-butyl acetylene, trimethylsilyl acetylene, the palladium salts and  $\text{Et}_3\text{N}$  were purchased from supplier.

**General procedure for the palladium/copper-catalyzed formation of the *o*-(1-alkynyl)anisoles.** To a solution of  $\text{Et}_3\text{N}$  (12.5 mL),  $\text{PdCl}_2(\text{PPh}_3)_2$  (2 mol %), 5 mmol of *o*-iodoanisole and 6 mmol of terminal acetylene (stirring for 5 min beforehand),  $\text{CuI}$  (1 mol %) was added and stirring was continued for another 2 min before flushing with Ar and the flask was then sealed. The mixture was allowed to stir at room temperature for 3-6 h and the resulting solution was filtered and washed with a saturated aq  $\text{NaCl}$  solution and extracted with diethyl ether (2 x 15 mL). The combined ether fractions were dried

over anhydrous Na<sub>2</sub>SO<sub>4</sub> and concentrated under vacuum to yield the crude product. The crude product was purified by flash chromatography on silica gel using ethyl acetate/hexane as the eluent.

**2-(Phenylethynyl)anisole (1).** The product was obtained as a yellow oil: <sup>1</sup>H NMR (CDCl<sub>3</sub>) δ 3.90 (s, 3H), 6.89 (d, *J* = 8.4 Hz, 1H), 6.93 (t, *J* = 7.6 Hz, 1H), 7.29-7.33 (m, 4H), 7.50 (d, *J* = 7.2 Hz, 1H), 7.55-7.57 (m, 2H); <sup>13</sup>C NMR (CDCl<sub>3</sub>) δ 56.0, 85.9, 93.6, 110.9, 112.6, 120.7, 123.7, 128.2, 128.3, 129.9, 131.8, 133.7, 160.1; IR (neat, cm<sup>-1</sup>) 3058, 2926, 2855, 2226; HRMS calcd for C<sub>15</sub>H<sub>12</sub>O 208.0888, found 208.0894. The spectral properties were identical to those previously reported.<sup>1</sup>

**2-[(Cyclohex-1-enyl)ethynyl]anisole (5).** The product was obtained as a yellow oil: <sup>1</sup>H NMR (CDCl<sub>3</sub>) 7.05-7.26 (m, 4H), 6.20 (s, 1H), 3.77 (s, 3H), 2.09-2.35 (m, 4H), 1.20-1.67 (m, 4H); IR (neat, cm<sup>-1</sup>) 3048, 2944, 2222; HRMS calcd for C<sub>15</sub>H<sub>16</sub>O 212.1201, found 212.1206. The spectral properties were identical to those previously reported.<sup>2</sup>

**2-[(4-Methoxyphenyl)ethynyl]anisole (8).** The product was obtained as a yellow oil: <sup>1</sup>H NMR (CDCl<sub>3</sub>) δ 3.77 (s, 3H), 3.87 (s, 3H), 6.83-6.93 (m, 4H), 7.26 (t, *J* = 8.0 Hz, 1H), 7.46-7.50 (m, 3H); <sup>13</sup>C NMR (CDCl<sub>3</sub>) δ 55.4, 55.9, 84.5, 93.6, 110.8, 112.8, 114.0, 115.8, 120.6, 129.6, 133.2, 133.5, 159.6, 159.9; IR (neat, cm<sup>-1</sup>) 2227; HRMS calcd for C<sub>16</sub>H<sub>14</sub>O<sub>2</sub> 238.0994, found 238.1000. The spectral properties were identical to those previously reported.<sup>3</sup>

**4-Methoxy-2-(phenylethynyl)anisole (11).** The product was obtained as a yellow oil: <sup>1</sup>H NMR (CDCl<sub>3</sub>) δ 3.76 (s, 3H), 3.86 (s, 3H), 6.80-6.84 (m, 2H), 7.05 (s, 1H), 7.30-7.34 (m, 3H), 7.56 (d, *J* = 6.0 Hz, 2H); <sup>13</sup>C NMR (CDCl<sub>3</sub>) δ 56.0, 56.7, 85.9, 93.6, 112.3, 113.1, 115.9, 118.3, 123.6, 128.4, 128.4, 131.8, 153.4, 154.7; IR (neat, cm<sup>-1</sup>) 3058, 2926,

2855, 2227, 1464, 1435, 749; HRMS calcd for C<sub>16</sub>H<sub>14</sub>O<sub>2</sub> 238.0994, found 238.0999. The spectral properties were identical to those previously reported.<sup>4</sup>

**4-Nitro-2-(phenylethynyl)anisole (14).** The product was obtained as a yellow oil: <sup>1</sup>H NMR (CDCl<sub>3</sub>) δ 4.01 (s, 3H), 6.96 (d, *J* = 9.2 Hz, 1H), 7.36-7.38 (m, 3H), 7.56-7.58 (m, 2H), 8.20 (dd, *J* = 9.2, 2.8 Hz, 1H), 8.38 (d, *J* = 2.4 Hz, 1H); <sup>13</sup>C NMR (CDCl<sub>3</sub>) δ 56.8, 83.5, 95.6, 110.5, 113.9, 122.7, 125.7, 128.6, 129.1, 129.2, 132.0, 141.3, 164.6; IR (neat, cm<sup>-1</sup>) 3058, 2926, 2855, 2225; HRMS calcd for C<sub>15</sub>H<sub>11</sub>NO<sub>3</sub> 253.0739, found 253.0742.

**5-Nitro-2-(phenylethynyl)anisole (16).** The product was obtained as a yellow oil: <sup>1</sup>H NMR (CDCl<sub>3</sub>) δ 4.01 (s, 3H), 7.37-7.38 (m, 3H), 7.57-7.62 (m, 3H), 7.75 (d, *J* = 2.0 Hz, 1H), 7.83 (dd, *J* = 8.4, 2.0 Hz, 1H); <sup>13</sup>C NMR (CDCl<sub>3</sub>) δ 56.6, 84.3, 98.6, 105.8, 115.9, 119.9, 122.7, 128.6, 129.3, 132.1, 133.7, 148.2, 160.3; IR (neat, cm<sup>-1</sup>) 3047, 2215; HRMS calcd for C<sub>15</sub>H<sub>11</sub>NO<sub>3</sub> 253.0739, found 253.0741.

**3-Methoxy-6-methyl-2-(phenylethynyl)pyridine (18).** The product was obtained as a yellow oil: <sup>1</sup>H NMR (CDCl<sub>3</sub>) δ 2.52 (s, 3H), 3.90 (s, 3H), 7.06-7.15 (m, 2H), 7.33-7.36 (m, 3H), 7.61-7.64 (m, 2H); <sup>13</sup>C NMR (CDCl<sub>3</sub>) δ 21.0, 55.8, 85.7, 93.7, 118.8, 122.9, 123.5, 128.4, 128.9, 132.3, 150.6, 155.3; IR (neat, cm<sup>-1</sup>) 2217; HRMS calcd for C<sub>15</sub>H<sub>13</sub>NO 233.0997, found 233.1002.

**2-Acetoxy-2'-methoxydiphenylacetylene (20).** The product was obtained as a yellow oil: <sup>1</sup>H NMR (CDCl<sub>3</sub>) δ 2.37 (s, 3H), 3.87 (s, 3H), 6.88 (d, *J* = 8.7 Hz, 1H), 6.92 (td, *J* = 7.5, 0.9 Hz, 1H), 7.11 (dd, *J* = 8.1, 1.5 Hz, 1H), 7.20 (td, *J* = 7.5, 1.5 Hz, 1H), 7.26-7.35 (m, 2H), 7.46 (dd, *J* = 7.5, 1.8 Hz, 1H), 7.59 (dd, *J* = 7.5, 1.8 Hz, 1H); <sup>13</sup>C NMR (CDCl<sub>3</sub>) δ 21.0, 55.8, 88.3, 90.9, 110.9, 112.3, 118.0, 120.6, 122.4, 126.0, 129.4,

130.2, 133.1, 133.7, 151.6, 160.1, 169.1; IR (neat,  $\text{cm}^{-1}$ ) 2213, 1770; HRMS calcd for  $\text{C}_{17}\text{H}_{14}\text{O}_3$  266.0943, found 266.0946.

**1,4-Bis[(2-methoxyphenyl)ethynyl]benzene (22).** The product was obtained as a yellow oil:  $^1\text{H}$  NMR ( $\text{CDCl}_3$ )  $\delta$  3.91 (s, 6H), 6.88-6.96 (m, 4H), 7.30 (t,  $J = 7.6$  Hz, 2H), 7.48-7.53 (m, 6H);  $^{13}\text{C}$  NMR ( $\text{CDCl}_3$ )  $\delta$  56.0, 87.7, 93.4, 110.8, 112.4, 120.7, 123.4, 130.1, 131.7, 133.7, 160.1; IR (neat,  $\text{cm}^{-1}$ ) 2210; HRMS calcd for  $\text{C}_{24}\text{H}_{18}\text{O}_2$  338.13068, found 338.13150.

**2,5-Dimethoxy-1,4-di(phenylethynyl)benzene (24).** The product was obtained as a yellow oil:  $^1\text{H}$  NMR ( $\text{CDCl}_3$ )  $\delta$  3.90 (s, 6H), 7.04 (s, 2H), 7.32-7.37 (m, 6H), 7.56-7.59 (m, 4H);  $^{13}\text{C}$  NMR ( $\text{CDCl}_3$ )  $\delta$  56.7, 85.9, 95.2, 113.6, 115.9, 123.4, 128.5, 128.6, 131.9, 154.1; IR (neat,  $\text{cm}^{-1}$ ) 2227; HRMS calcd for  $\text{C}_{24}\text{H}_{18}\text{O}_2$  338.13068, found 338.13151. The spectral properties were identical to those previously reported.<sup>5</sup>

**2,4-Dimethoxy-1-(phenylethynyl)benzene (26).** The product was obtained as a yellow oil:  $^1\text{H}$  NMR ( $\text{CDCl}_3$ )  $\delta$  3.79 (s, 3H), 3.87 (s, 3H), 6.45 (s, 1H), 6.48 (d,  $J = 6.0$  Hz, 1H), 7.27-7.34 (m, 3H), 7.42 (d,  $J = 9.0$  Hz, 1H), 7.54 (d,  $J = 9.0$  Hz, 2H);  $^{13}\text{C}$  NMR ( $\text{CDCl}_3$ )  $\delta$  55.5, 56.0, 86.0, 92.1, 98.6, 105.0, 105.1, 124.0, 127.9, 128.4, 131.6, 134.5, 161.3, 161.4; IR (neat,  $\text{cm}^{-1}$ ) 3058, 2926, 2855, 2227, 1464, 1435, 749; HRMS calcd for  $\text{C}_{16}\text{H}_{14}\text{O}_2$  238.0994, found 238.1000. The spectral properties were identical to those previously reported.<sup>4</sup>

**2-(1-Octynyl)anisole (27).** The product was obtained as a yellow oil:  $^1\text{H}$  NMR ( $\text{CDCl}_3$ )  $\delta$  0.88-0.93 (m, 3H), 1.30-1.34 (m, 4H), 1.46-1.50 (m, 2H), 1.60-1.65 (m, 2H), 2.47 (t,  $J = 7.2$  Hz, 2H), 3.87 (s, 3H), 6.85 (d,  $J = 8.4$  Hz, 1H), 6.88 (td,  $J = 7.5, 0.9$  Hz, 1H), 7.24 (td,  $J = 8.1, 1.8$  Hz, 1H), 7.37 (dd,  $J = 7.5, 1.8$  Hz, 1H); HRMS calcd for

C<sub>15</sub>H<sub>20</sub>O 216.1514, found 216.1519. The spectral properties were identical to those previously reported.<sup>2</sup>

**2-[(4-Nitrophenyl)ethynyl]anisole (28).** The product was obtained as a yellow oil: <sup>1</sup>H NMR (CDCl<sub>3</sub>) δ 3.92 (s, 3H), 6.92-6.99 (m, 2H), 7.37 (t, *J* = 8.4 Hz, 1H), 7.50 (d, *J* = 8.0 Hz, 1H), 7.70 (d, *J* = 8.8 Hz, 2H), 8.19 (d, *J* = 8.8 Hz, 2H); <sup>13</sup>C NMR (CDCl<sub>3</sub>) δ 56.0, 91.6, 91.4, 110.9, 111.4, 120.8, 123.7, 130.8, 131.1, 132.4, 133.9, 147.0, 160.4; HRMS calcd for C<sub>15</sub>H<sub>11</sub>NO<sub>2</sub> 253.0739, found 253.0745.

**2-(Trimethylsilylethynyl)anisole (29).** The product was obtained as a yellow oil: <sup>1</sup>H NMR (CDCl<sub>3</sub>) δ 0.08 (s, 9H), 3.68 (s, 3H), 6.64-6.71 (m, 2H), 7.08 (td, *J* = 8.4, 2.0 Hz, 1H), 7.24 (dd, *J* = 7.6, 1.6 Hz, 1H); <sup>13</sup>C NMR (CDCl<sub>3</sub>) δ 0.3, 56.0, 98.6, 101.5, 110.8, 112.5, 120.5, 130.2, 134.4, 160.5. The spectral properties were identical to those previously reported.<sup>6</sup>

**2,4-Dimethoxy-5-(phenylethynyl)pyrimidine (30).** The product was obtained as a yellow oil: <sup>1</sup>H NMR (CDCl<sub>3</sub>) δ 4.01 (s, 3H), 4.06 (s, 3H), 7.32-7.35 (m, 3H), 7.51-7.54 (m, 2H), 8.40 (s, 1H); <sup>13</sup>C NMR (CDCl<sub>3</sub>) δ 54.6, 55.2, 80.8, 95.5, 100.2, 122.9, 128.4, 128.6, 131.6, 161.3, 164.2, 170.4; IR (neat, cm<sup>-1</sup>) 2207 cm<sup>-1</sup>; HRMS calcd for C<sub>14</sub>H<sub>12</sub>N<sub>2</sub>O<sub>2</sub> 240.0899, found 240.0901. The spectral properties were identical to those previously reported.<sup>7</sup>

**2-(1-Decynyl)-3-methoxy-6-methyl-pyridine (32).** The product was obtained as a yellow oil: <sup>1</sup>H NMR (CDCl<sub>3</sub>) δ 0.88 (t, *J* = 6.8 Hz, 3H), 1.28-1.33 (m, 8H), 1.43-1.48 (m, 2H), 1.61-1.68 (m, 2H), 2.47 (s, 3H), 2.49 (t, *J* = 7.2 Hz, 2H), 3.85 (s, 3H), 7.10 (d, *J* = 8.7 Hz, 1H), 7.73 (d, *J* = 8.7 Hz, 1H); <sup>13</sup>C NMR (CDCl<sub>3</sub>) δ 14.2, 19.9, 22.8, 23.5, 28.6,

29.2, 29.2, 29.3, 31.9, 56.0, 77.1, 95.7, 118.5, 122.7, 133.0, 150.1, 154.8; IR (neat,  $\text{cm}^{-1}$ ) 2217; HRMS calcd for  $\text{C}_{17}\text{H}_{25}\text{NO}$  259.1936, found 259.1941.

**General procedure for the iodocyclizations.** To a solution of 0.25 mmol of the *o*-(1-alkynyl)anisole and 3 mL of  $\text{CH}_2\text{Cl}_2$ , 2 equiv of  $\text{I}_2$  or 1.2 equiv of  $\text{ICl}$  dissolved in 2 mL of  $\text{CH}_2\text{Cl}_2$  was added gradually. The reaction mixture was flushed with Ar and allowed to stir at room temperature for 3 h or 12 h. The excess  $\text{I}_2$  or  $\text{Br}_2$  was removed by washing with a satd aq  $\text{Na}_2\text{S}_2\text{O}_3$  solution. The mixture was then extracted by diethyl ether (2 x 10 mL). The combined ether layers were dried over anhydrous  $\text{Na}_2\text{SO}_4$  and concentrated under vacuum to yield the crude product, which was purified by flash chromatography on silica gel using ethyl acetate/hexanes as the eluent.

**3-Iodo-2-phenylbenzo[*b*]furan (2).** The product was obtained as a yellow oil:  $^1\text{H}$  NMR ( $\text{CDCl}_3$ )  $\delta$  7.28-7.51 (m, 7H), 8.16-8.19 (m, 2H);  $^{13}\text{C}$  NMR ( $\text{CDCl}_3$ )  $\delta$  61.3, 111.4, 122.1, 123.7, 125.9, 127.7, 128.7, 129.4, 130.2, 132.7, 153.2, 154.1; IR (neat,  $\text{cm}^{-1}$ ) 3058, 1450; HRMS calcd for  $\text{C}_{14}\text{H}_{18}\text{INO}_3$  364.9549, found 364.9551. The spectral properties were identical to those previously reported.<sup>8</sup>

**2-(Cyclohex-1-enyl)-3-iodobenzo[*b*]furan (6).** The product was obtained as a yellow oil:  $^1\text{H}$  NMR ( $\text{CDCl}_3$ )  $\delta$  1.66-1.70 (m, 2H), 1.77-1.79 (m, 2H), 2.25-2.29 (m, 2H), 2.59-2.64 (m, 2H), 6.77-6.79 (m, 2H), 7.24-7.28 (m, 2H), 7.35-7.38 (m, 2H);  $^{13}\text{C}$  NMR ( $\text{CDCl}_3$ )  $\delta$  21.9, 22.7, 25.9, 26.9, 59.1, 111.0, 121.7, 123.3, 125.2, 128.2, 132.0, 132.2, 153.5, 155.3; IR (neat,  $\text{cm}^{-1}$ ) 3058, 2199, 1475; HRMS calcd for  $\text{C}_{14}\text{H}_{13}\text{IO}$  324.0011, found 324.0020.

**3-Iodo-2-(4-methoxyphenyl)benzo[*b*]furan (9).** The product was obtained as a yellow oil:  $^1\text{H}$  NMR (400 MHz,  $\text{CDCl}_3$ )  $\delta$  3.84 (s, 3H), 6.99 (d,  $J = 8.0$  Hz, 2H), 7.28-

7.31 (m, 2H), 7.39-7.45 (m, 2H), 8.10 (d,  $J = 8.8$  Hz, 2H);  $^{13}\text{C}$  NMR (100 MHz,  $\text{CDCl}_3$ )  $\delta$  55.5, 59.7, 111.2, 114.1, 121.7, 122.8, 123.6, 125.4, 129.2, 132.8, 153.4, 153.9, 160.5; IR (neat,  $\text{cm}^{-1}$ ) 3058, 2227, 1464; HRMS calcd for  $\text{C}_{15}\text{H}_{11}\text{IO}_2$  349.98038, found 349.98100.

**3-Iodo-5-methoxy-2-phenylbenzo[*b*]furan (12).** The product was obtained as a yellow oil:  $^1\text{H}$  NMR ( $\text{CDCl}_3$ )  $\delta$  3.89 (s, 3H), 6.88 (s, 1H), 6.94 (d,  $J = 8.5$  Hz, 1H), 7.36 (d,  $J = 8.8$  Hz, 1H), 7.41 (t,  $J = 7.2$  Hz, 1H), 7.48 (t,  $J = 7.6$  Hz, 2H), 8.14 (d,  $J = 7.2$  Hz, 2H);  $^{13}\text{C}$  NMR ( $\text{CDCl}_3$ )  $\delta$  56.2, 61.3, 104.1, 112.1, 114.9, 127.6, 128.7, 129.4, 130.3, 133.3, 149.0, 154.0, 156.9; IR (neat,  $\text{cm}^{-1}$ ) 3058, 2926, 2855, 2227, 1464, 1435, 749; HRMS calcd for  $\text{C}_{15}\text{H}_{11}\text{O}_2\text{I}$  349.9804, found 349.9810.

**3-Iodo-5-nitro-2-phenylbenzo[*b*]furan (15).** The product was obtained as a yellow oil:  $^1\text{H}$  NMR ( $\text{CDCl}_3$ )  $\delta$  7.50-7.58 (m, 4H), 8.15-8.18 (m, 2H), 8.27 (dd,  $J = 12.0, 3.2$  Hz, 1H), 8.37 (d,  $J = 3.2$  Hz, 1H);  $^{13}\text{C}$  NMR ( $\text{CDCl}_3$ )  $\delta$  60.9, 111.9, 118.7, 121.5, 127.8, 128.9, 129.0, 130.4, 133.6, 144.9, 156.5, 157.0; IR (neat,  $\text{cm}^{-1}$ ) 3058, 2926; HRMS calcd for  $\text{C}_{14}\text{H}_{18}\text{INO}_3$  364.9549, found 364.9551.

**3-Iodo-6-nitro-2-phenylbenzo[*b*]furan (17).** The product was obtained as a yellow oil:  $^1\text{H}$  NMR ( $\text{CDCl}_3$ )  $\delta$  7.50-7.56 (m, 4H), 8.18-8.21 (m, 2H), 8.23 (dd,  $J = 8.4, 2.0$  Hz, 1H), 8.39 (d,  $J = 2.0$  Hz, 1H);  $^{13}\text{C}$  NMR ( $\text{CDCl}_3$ )  $\delta$  60.6, 107.8, 119.5, 122.1, 128.0, 129.0, 129.0, 130.7, 138.5, 146.1, 152.6, 158.4; IR (neat,  $\text{cm}^{-1}$ ) 3058, 2926; HRMS calcd for  $\text{C}_{14}\text{H}_{18}\text{INO}_3$  364.9549, found 364.9552.

**3-Iodo-5-methyl-2-phenylfuro[3,3-*b*]pyridine (19).** The product was obtained as a yellow oil:  $^1\text{H}$  NMR ( $\text{CDCl}_3$ )  $\delta$  2.73 (s, 3H), 7.14 (d,  $J = 8.4$  Hz, 1H), 7.46-7.54 (m, 3H), 7.62 (d,  $J = 8.4$  Hz, 1H), 8.21-8.24 (m, 2H);  $^{13}\text{C}$  NMR ( $\text{CDCl}_3$ )  $\delta$  24.7, 64.4, 118.5,



120.6, 127.8, 128.8, 129.9, 130.0, 145.8, 148.9, 156.0, 156.2; IR (neat,  $\text{cm}^{-1}$ ) 1775; HRMS calcd for  $\text{C}_{14}\text{H}_{10}\text{NIO}$  334.9808, found 334.9809.

**2-(2-Acetoxyphenyl)-3-iodobenzo[*b*]furan (21).** The product was obtained as a yellow oil:  $^1\text{H}$  NMR ( $\text{CDCl}_3$ )  $\delta$  2.21 (s, 3H), 7.25 (dd,  $J = 8.1, 1.2$  Hz, 1H), 7.32-7.40 (m, 3H), 7.44-7.53 (m, 3H), 7.82 (dd,  $J = 7.8, 1.8$  Hz, 1H);  $^{13}\text{C}$  NMR ( $\text{CDCl}_3$ )  $\delta$  21.3, 65.4, 111.4, 122.1, 123.3, 123.7, 123.8, 126.0, 126.1, 131.2, 131.7, 131.9, 148.8, 152.3, 154.6, 169.4; IR (neat,  $\text{cm}^{-1}$ ) 1771; HRMS calcd for  $\text{C}_{16}\text{H}_{11}\text{IO}_3$  377.9753, found 377.9758.

**2,2'-(1,4-Phenylene)-bis-3-iodobenzofuran (23).** The product was obtained as a white solid: mp > 210 °C (decompose);  $^1\text{H}$  NMR ( $\text{CDCl}_3$ )  $\delta$  7.34-7.42 (m, 4H), 7.47-7.53 (m, 4H), 8.36 (s, 4H);  $^{13}\text{C}$  NMR ( $\text{CDCl}_3$ )  $\delta$  62.3, 111.5, 122.2, 123.9, 126.3, 127.5, 130.7, 132.8, 152.5, 154.2; IR ( $\text{CH}_2\text{Cl}_2$ ) 3058, 2926; HRMS calcd for  $\text{C}_{22}\text{H}_{12}\text{I}_2\text{O}_2$  561.8927, found 561.8934.

**3,7-Diiodo-2,6-diphenyl-benzo[1,2-*b*;4,5-*b'*]difuran (25).** The compound was obtained as a white solid: mp > 320 °C (decompose);  $^1\text{H}$  NMR ( $\text{CD}_2\text{Cl}_2$ )  $\delta$  7.48-7.59 (m, 7H), 8.23-8.26 (m, 5H); HRMS calcd for  $\text{C}_{22}\text{H}_{12}\text{I}_2\text{O}_2$  561.8927, found 561.8934.  $^{13}\text{C}$  NMR could not be obtained because of the poor solubility of the product; IR ( $\text{CH}_2\text{Cl}_2$ ) 3058, 2926.

**2-(1,2-Diiodo-1-decenyl)-3-methoxy-6-methylpyridine (33).** The product was obtained as a yellow oil:  $^1\text{H}$  NMR ( $\text{CDCl}_3$ )  $\delta$  0.88-0.92 (m, 3H), 1.25-1.44 (m, 10H), 1.65-1.70 (m, 2H), 2.50 (s, 3H), 2.72-2.77 (m, 1H), 2.84-2.89 (m, 1H), 3.86 (s, 3H), 7.10 (dd,  $J = 13.5, 8.4$  Hz, 2H);  $^{13}\text{C}$  NMR ( $\text{CDCl}_3$ )  $\delta$  14.3, 22.9, 23.7, 28.5, 28.6, 29.4, 29.7, 32.1, 49.1, 56.1, 91.0, 107.4, 120.1, 124.1, 149.5, 149.7, 151.9; IR (neat,  $\text{cm}^{-1}$ ) 1715.

The products in entries 17, 19 and 24 could not be fully characterized because of their instability.

**General procedure for the *p*-O<sub>2</sub>NC<sub>6</sub>H<sub>4</sub>SeCl and PhSeCl cyclizations.** To a solution of 0.25 mmol of the *o*-(1-alkynyl)anisole and CH<sub>2</sub>Cl<sub>2</sub> (5 mL), 0.375 mmol of *p*-O<sub>2</sub>NC<sub>6</sub>H<sub>4</sub>SeCl or PhSeCl dissolved in CH<sub>2</sub>Cl<sub>2</sub> (2 mL) was added. The mixture was flushed with Ar and allowed to stir at 25 °C for 3 h. The reaction mixture was then washed with 20 mL of water and extracted with diethyl ether. The combined ether layers were dried over anhydrous Na<sub>2</sub>SO<sub>4</sub> and concentrated under vacuum to yield the crude product, which was further purified by flash chromatography on silica gel using ethyl acetate/hexanes as the eluent.

**2-Phenyl-3-(phenylselenyl)benzo[*b*]furan (3).** The product was obtained as a yellow oil: <sup>1</sup>H NMR (CDCl<sub>3</sub>) δ 7.13-7.17 (m, 3H), 7.22 (t, *J* = 4.0 Hz, 1H), 7.27-7.32 (m, 4H), 7.43 (t, *J* = 7.6 Hz, 2H), 7.51 (d, *J* = 8.0 Hz, 1H), 7.54 (d, *J* = 8.0 Hz, 1H), 8.19-8.21 (m, 2H); <sup>13</sup>C NMR (CDCl<sub>3</sub>) δ 99.9, 111.4, 121.4, 123.6, 125.4, 126.4, 128.0, 128.7, 129.4, 129.5, 130.3, 131.6, 132.1, 154.3, 157.4; IR (neat, cm<sup>-1</sup>) 3058, 2926; HRMS calcd for C<sub>20</sub>H<sub>14</sub>OSe 350.0211, found 350.0220.

**2-Phenyl-3-(*p*-nitrophenylsulfenyl)benzo[*b*]furan (4).** The product was obtained as a yellow oil: <sup>1</sup>H NMR (CDCl<sub>3</sub>) δ 7.22 (d, *J* = 8.8 Hz, 2H), 7.26 (d, *J* = 7.6 Hz, 1H), 7.35-7.46 (m, 5H), 7.60 (d, *J* = 8.0 Hz, 1H), 8.02 (d, *J* = 8.8 Hz, 2H), 8.13 (d, *J* = 7.2 Hz, 2H); <sup>13</sup>C NMR (CDCl<sub>3</sub>) δ 102.1, 111.9, 120.1, 124.1, 124.4, 125.9, 126.0, 127.6, 128.9, 129.3, 130.1, 130.1, 145.6, 146.4, 154.2, 158.6; IR (neat, cm<sup>-1</sup>) 3058, 2926; HRMS calcd for C<sub>20</sub>H<sub>13</sub>NO<sub>3</sub>S 347.0617, found 347.0622.

**2-(Cyclohex-1-enyl)-3-(phenylselenyl)benzofuran (7).** The product was obtained as a yellow oil:  $^1\text{H}$  NMR ( $\text{CDCl}_3$ )  $\delta$  1.64-1.66 (m, 2H), 1.72-1.74 (m, 2H), 2.19-2.21 (m, 2H), 2.50-2.51 (m, 2H), 6.09-6.10 (m, 1H), 7.10-7.15 (m, 5H), 7.28-7.31 (m, 2H), 7.76-7.78 (m, 2H);  $^{13}\text{C}$  NMR ( $\text{CDCl}_3$ )  $\delta$  21.9, 23.0, 25.9, 30.4, 114.0, 122.2, 124.7, 125.0, 126.0, 129.3, 131.7, 132.0, 133.3, 138.4, 142.0, 152.1; IR (neat,  $\text{cm}^{-1}$ ) 3025; HRMS calcd for  $\text{C}_{20}\text{H}_{18}\text{OSe}$  354.05240, found 354.05330.

**2-(4-Methoxyphenyl)-3-(phenylselenyl)benzo[*b*]furan (10).** The product was obtained as a yellow oil:  $^1\text{H}$  NMR (400 MHz,  $\text{CDCl}_3$ )  $\delta$  3.82 (s, 3H), 6.95 (d,  $J = 8.0$  Hz, 2H), 7.11-7.23 (m, 4H), 7.26-7.53 (m, 3H), 7.48-7.53 (dd,  $J = 8.4, 7.6$  Hz, 2H), 8.15 (d,  $J = 8.8$  Hz, 2H);  $^{13}\text{C}$  NMR (100 MHz,  $\text{CDCl}_3$ )  $\delta$  55.1, 98.0, 111.2, 114.1, 121.1, 123.0, 123.5, 125.0, 126.3, 129.1, 129.5, 131.8, 132.3, 154.1, 157.7, 160.6; HRMS calcd for  $\text{C}_{21}\text{H}_{16}\text{SeO}_2$  380.0317, found 380.0328.

**5-Methoxy-2-phenyl-3-(phenylselenyl)benzo[*b*]furan (13).** The product was obtained as a yellow oil:  $^1\text{H}$  NMR (400 MHz,  $\text{CDCl}_3$ )  $\delta$  3.75 (s, 3H), 6.90-6.93 (m, 2H), 7.12-7.17 (m, 3H), 7.29 (d,  $J = 8.0$  Hz, 2H), 7.36-7.44 (m, 4H), 7.18 (d,  $J = 2.0$  Hz, 2H);  $^{13}\text{C}$  NMR (100 MHz,  $\text{CDCl}_3$ )  $\delta$  56.0, 99.6, 103.3, 112.0, 114.5, 126.4, 127.9, 128.6, 129.3, 129.4, 129.5, 130.4, 131.6, 132.9, 149.2, 156.7, 158.2; IR (neat,  $\text{cm}^{-1}$ ) 3058, 2926, 2855, 2227, 1464, 1435, 749; HRMS calcd for  $\text{C}_{21}\text{H}_{16}\text{O}_2\text{Se}$  380.03166, found 380.03279.

The product in entry 18 could not be fully characterized because of its instability.

## References

1. Larock, R. C.; Harrison, L. W. *J. Am. Chem. Soc.* **1984**, *106*, 4218.
2. Ma, Y.; Song, C.; Jiang, W.; Wu, Q.; Wang, Y.; Liu, X.; Andrus, M. B. *Org. Lett.* **2003**, *5*, 3317.

3. Nishihara, Y.; Ikegashira, K.; Hirabayashi, K.; Ando, J.-I.; Mori, A.; Hiyama, T. *J. Org. Chem.* **2000**, *65*, 1780.
4. Wadsworth, D. H.; Donatelli, B. A. *Synthesis*, **1981**, 285.
5. Strukelj, M.; Jordan, R. H.; Dodabalapur, A. *J. Am. Chem. Soc.* **1996**, *118*, 1213.
6. Huang, Qinhua; Larock, Richard C. *J. Org. Chem.* **2003**, *68*, 980.
7. Pal, M.; Kandu, N. G. *J. Chem. Soc., Perkin Trans. 1* **1996**, 449.
8. Arcadi, A.; Cacchi, S.; Giancarlo, F.; Marinelli, F.; Moro, L. *Synlet.* **1999**, 1432.

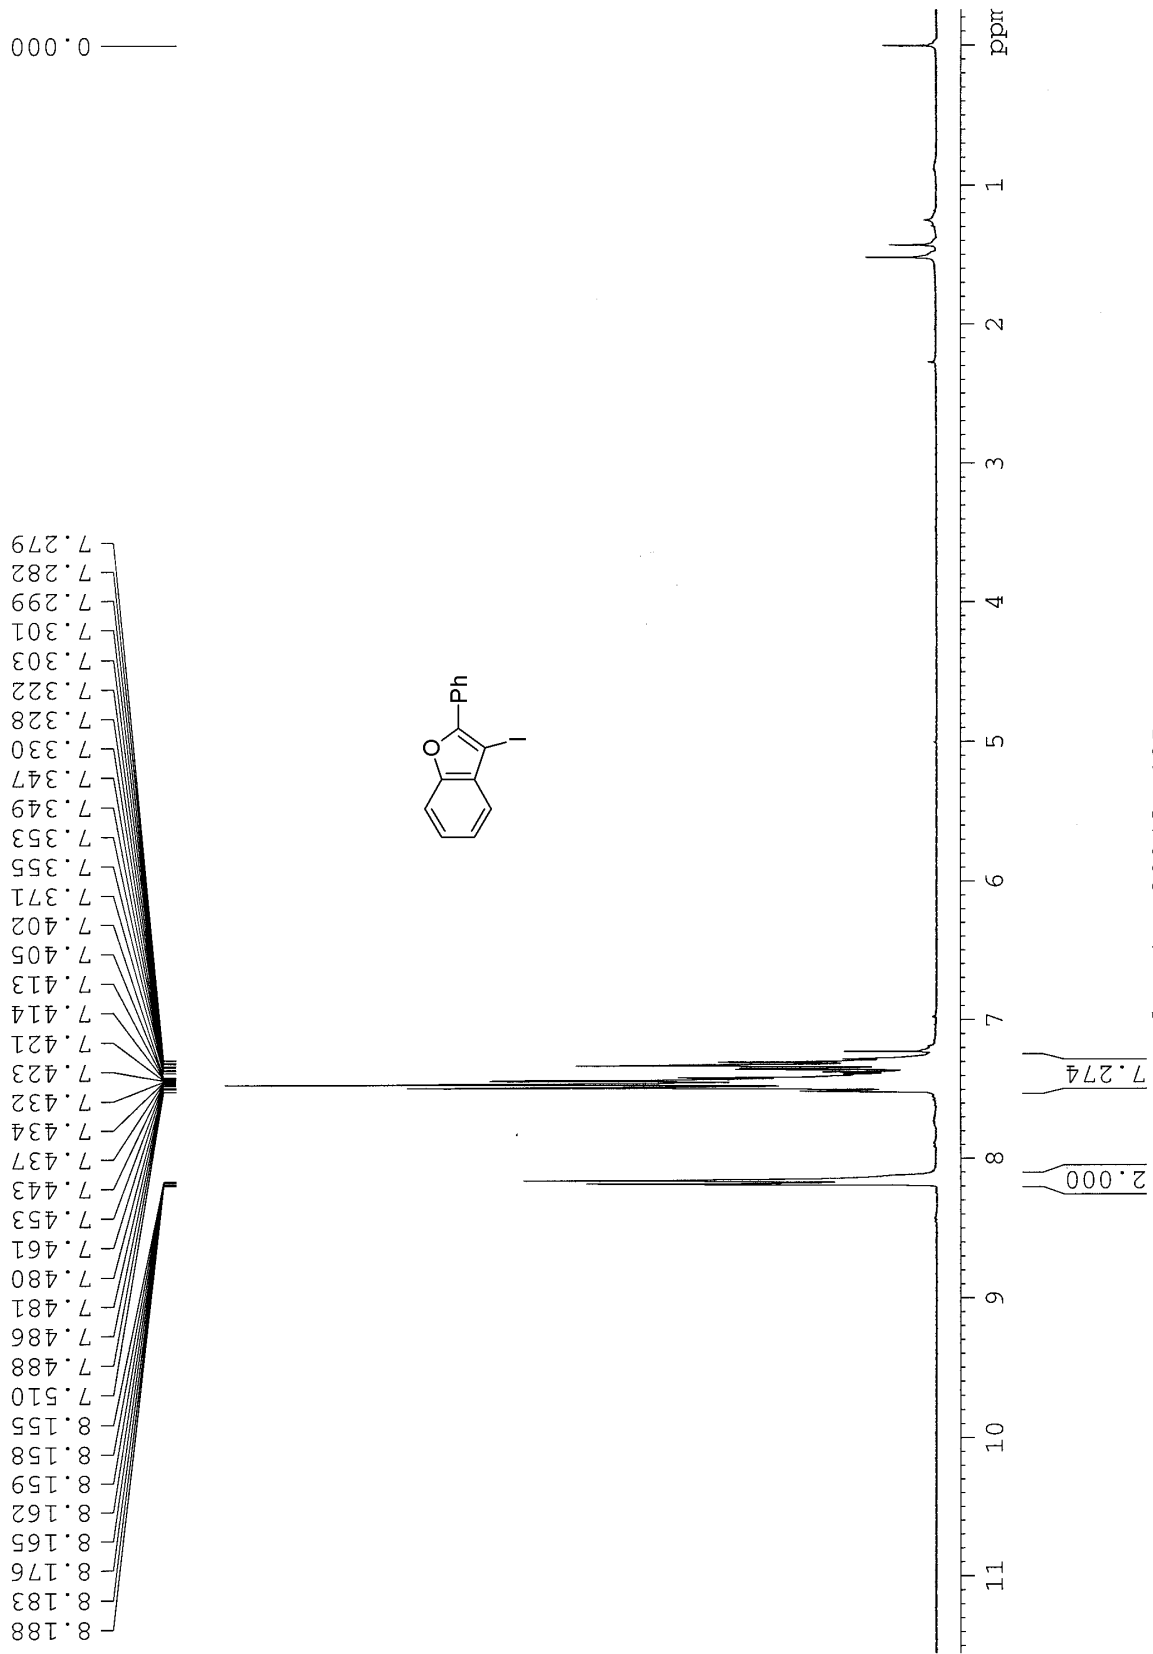

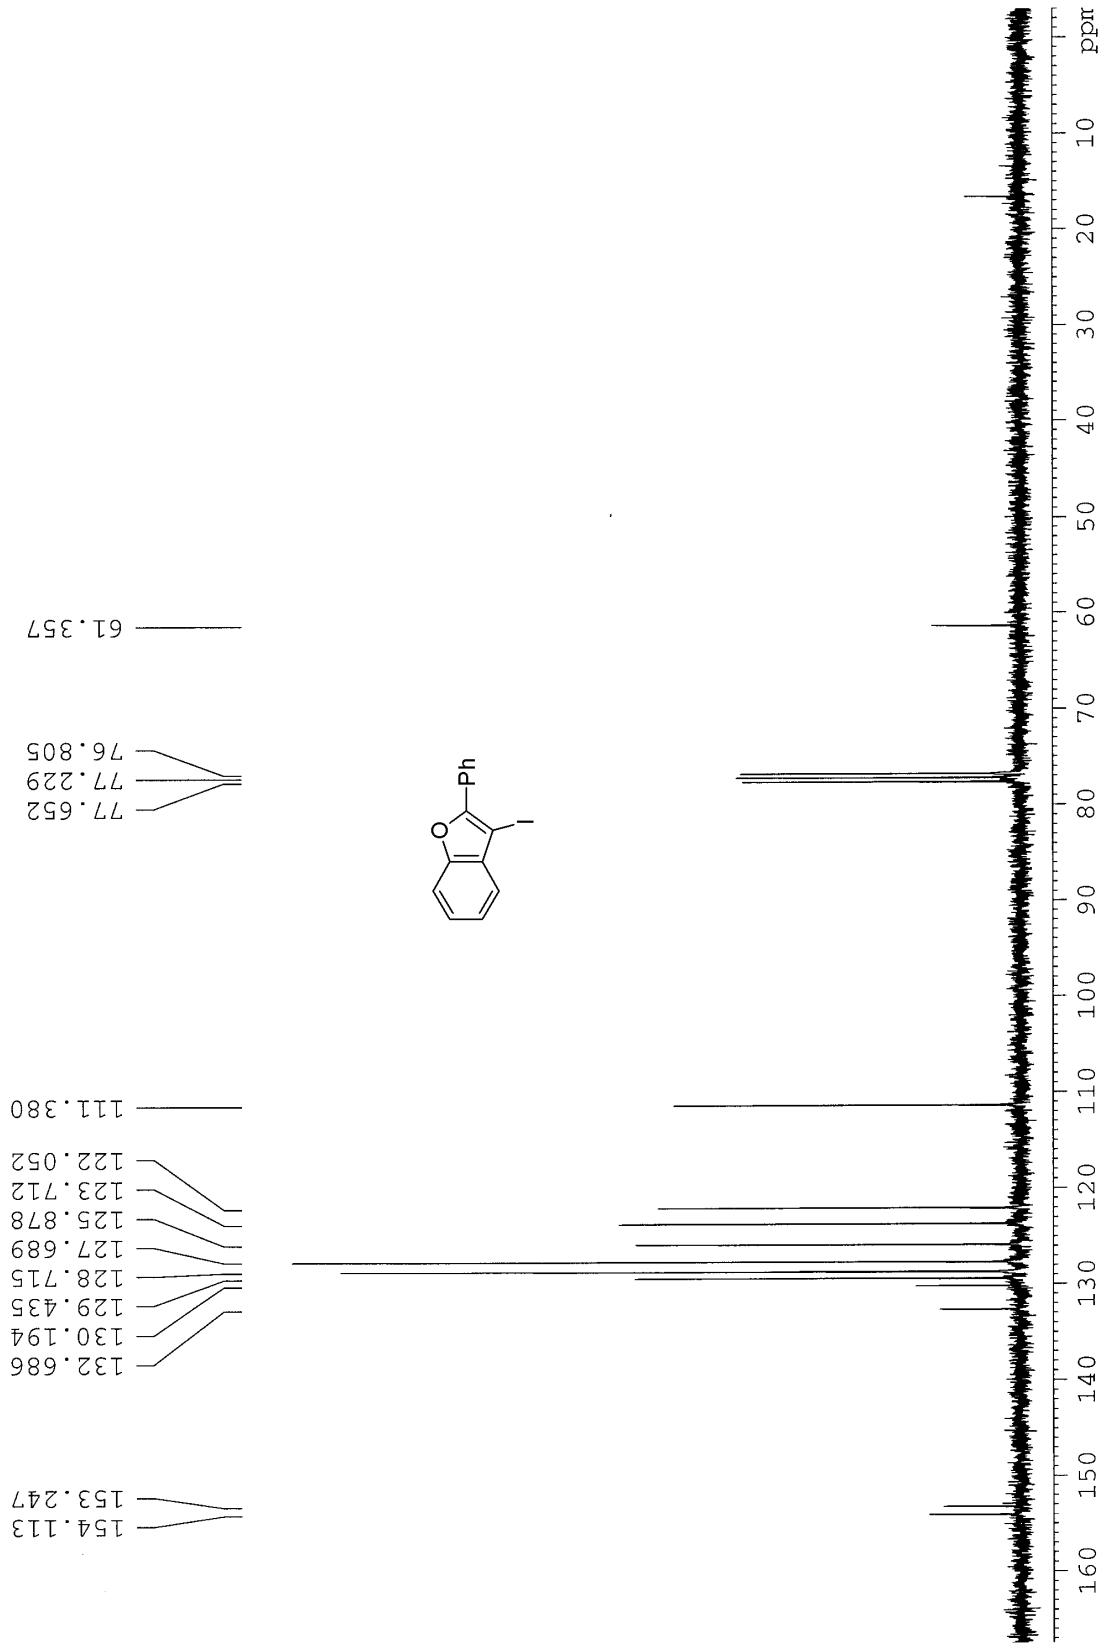

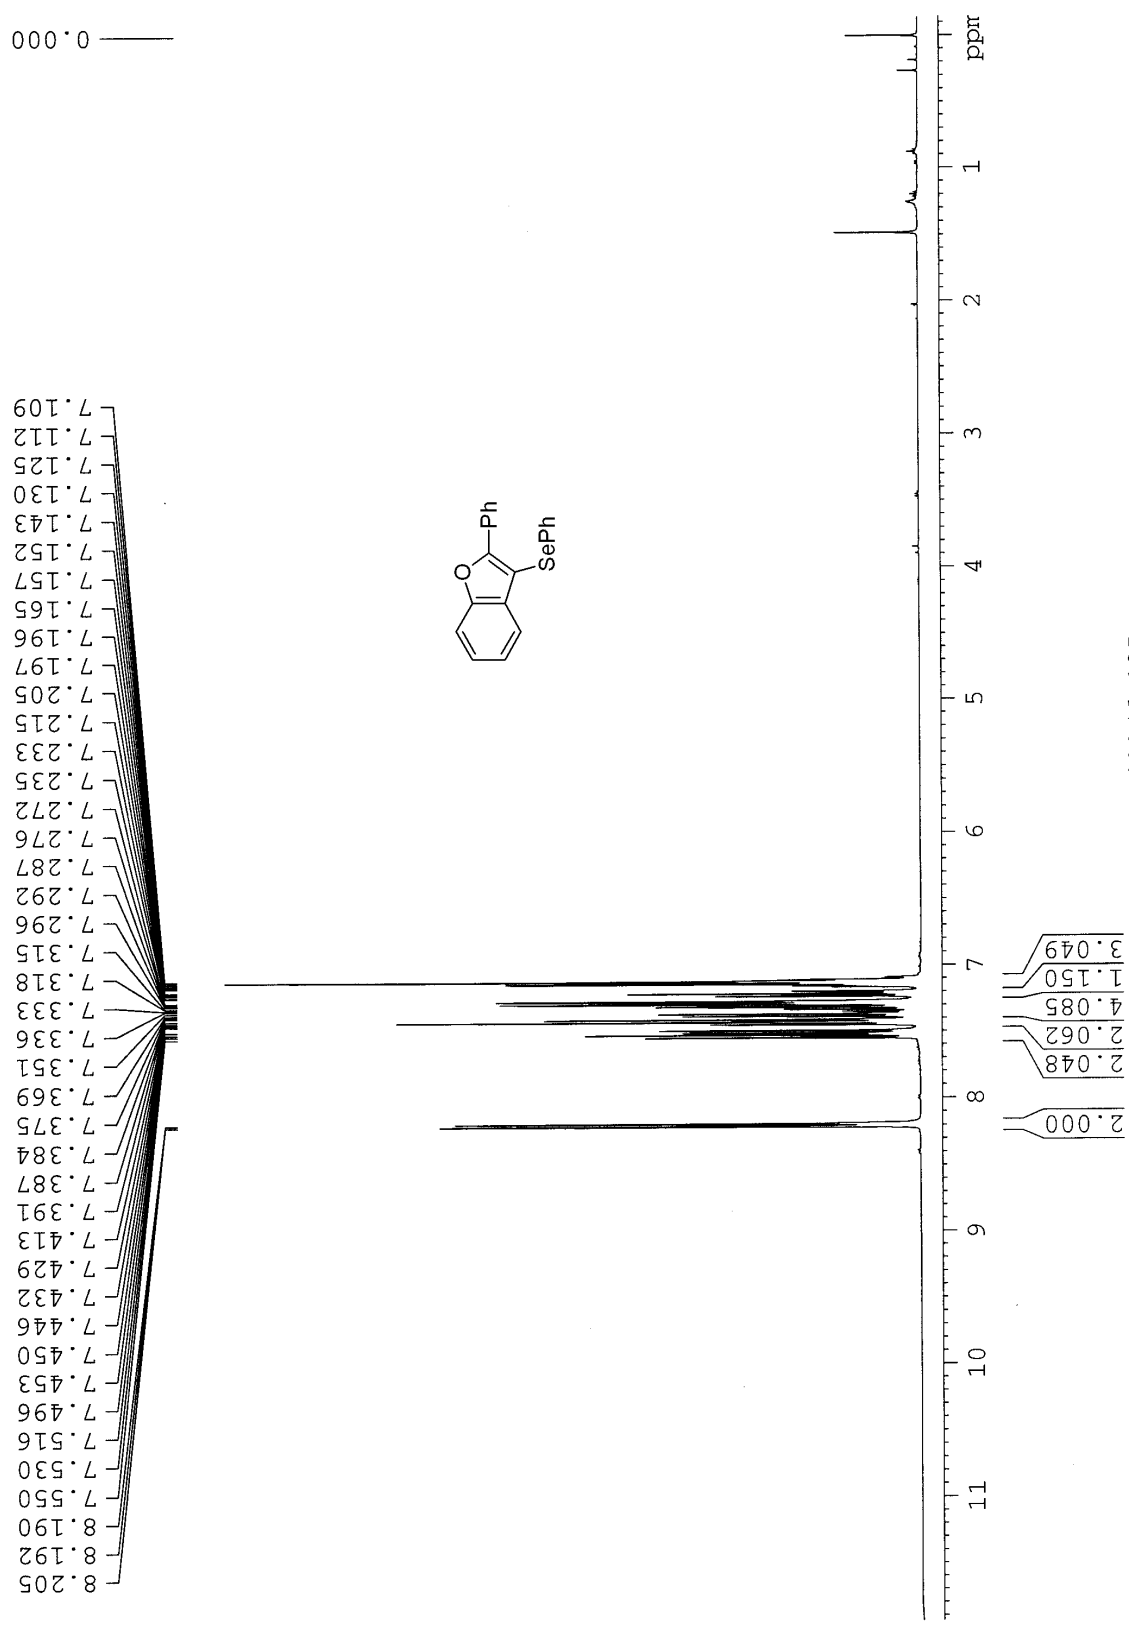

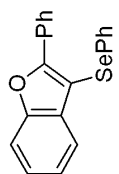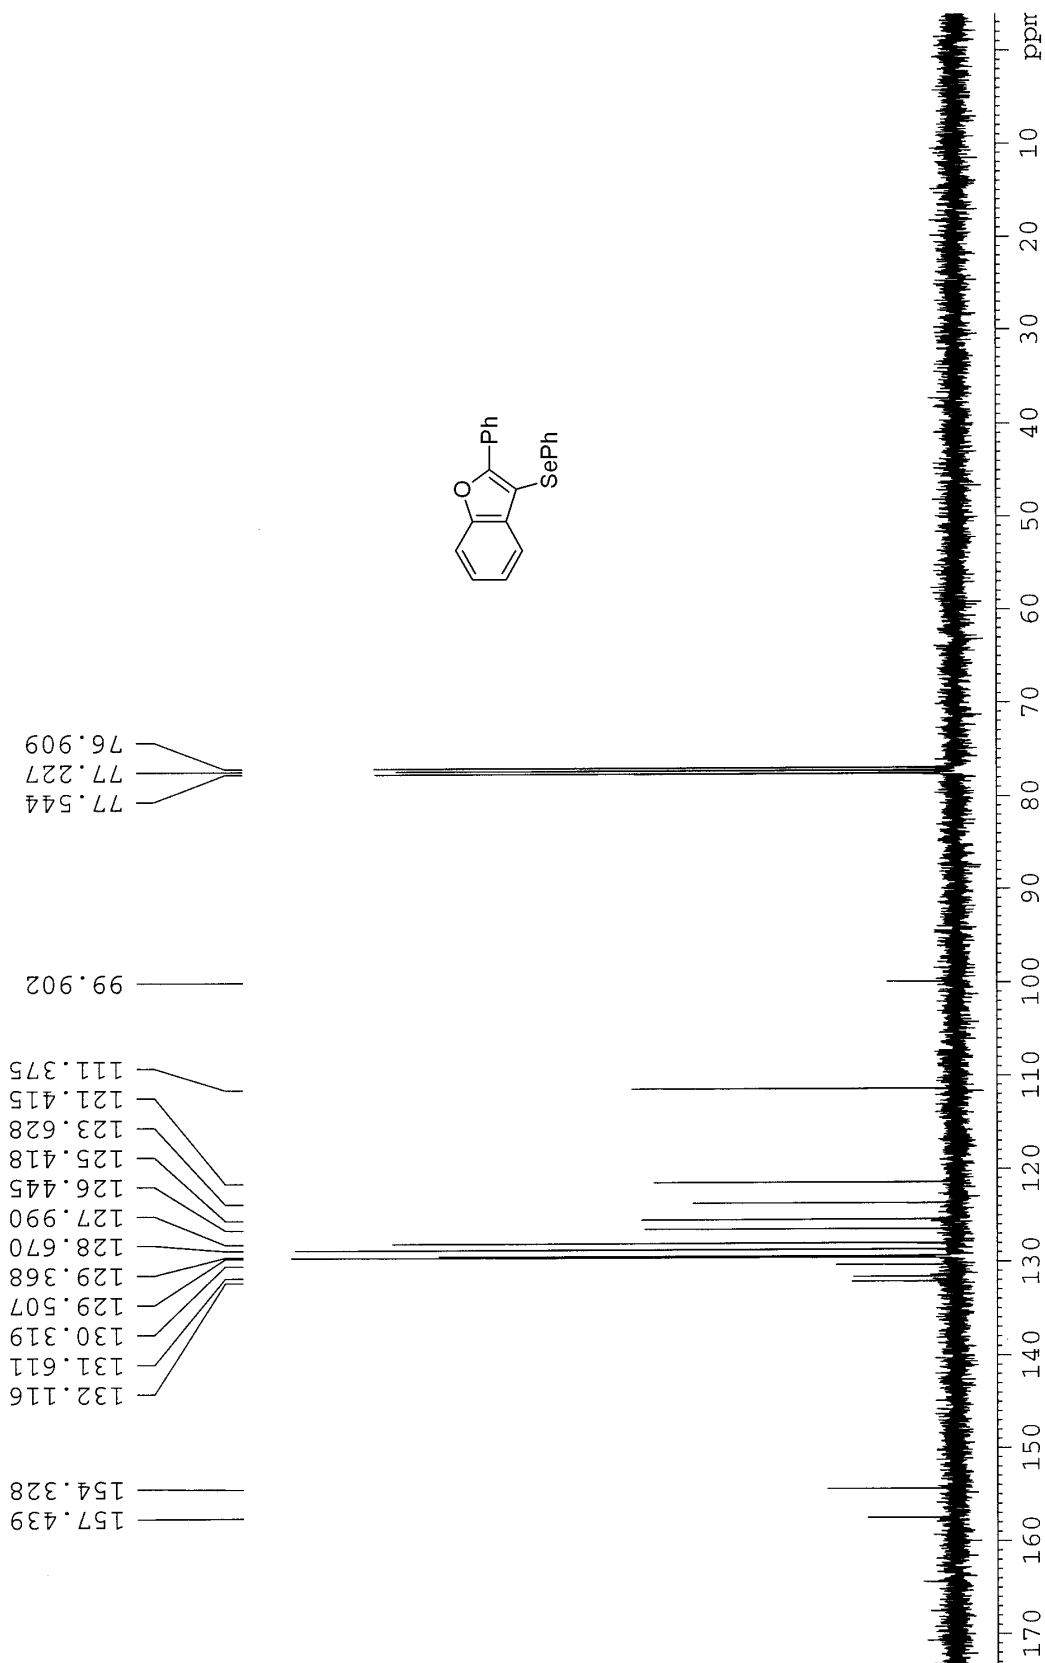



-0.1009

8.144  
8.142  
8.125  
8.034  
8.012  
7.606  
7.586  
7.457  
7.441  
7.421  
7.415  
7.411  
7.399  
7.391  
7.373  
7.353  
7.270  
7.251  
7.230  
7.208

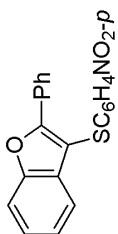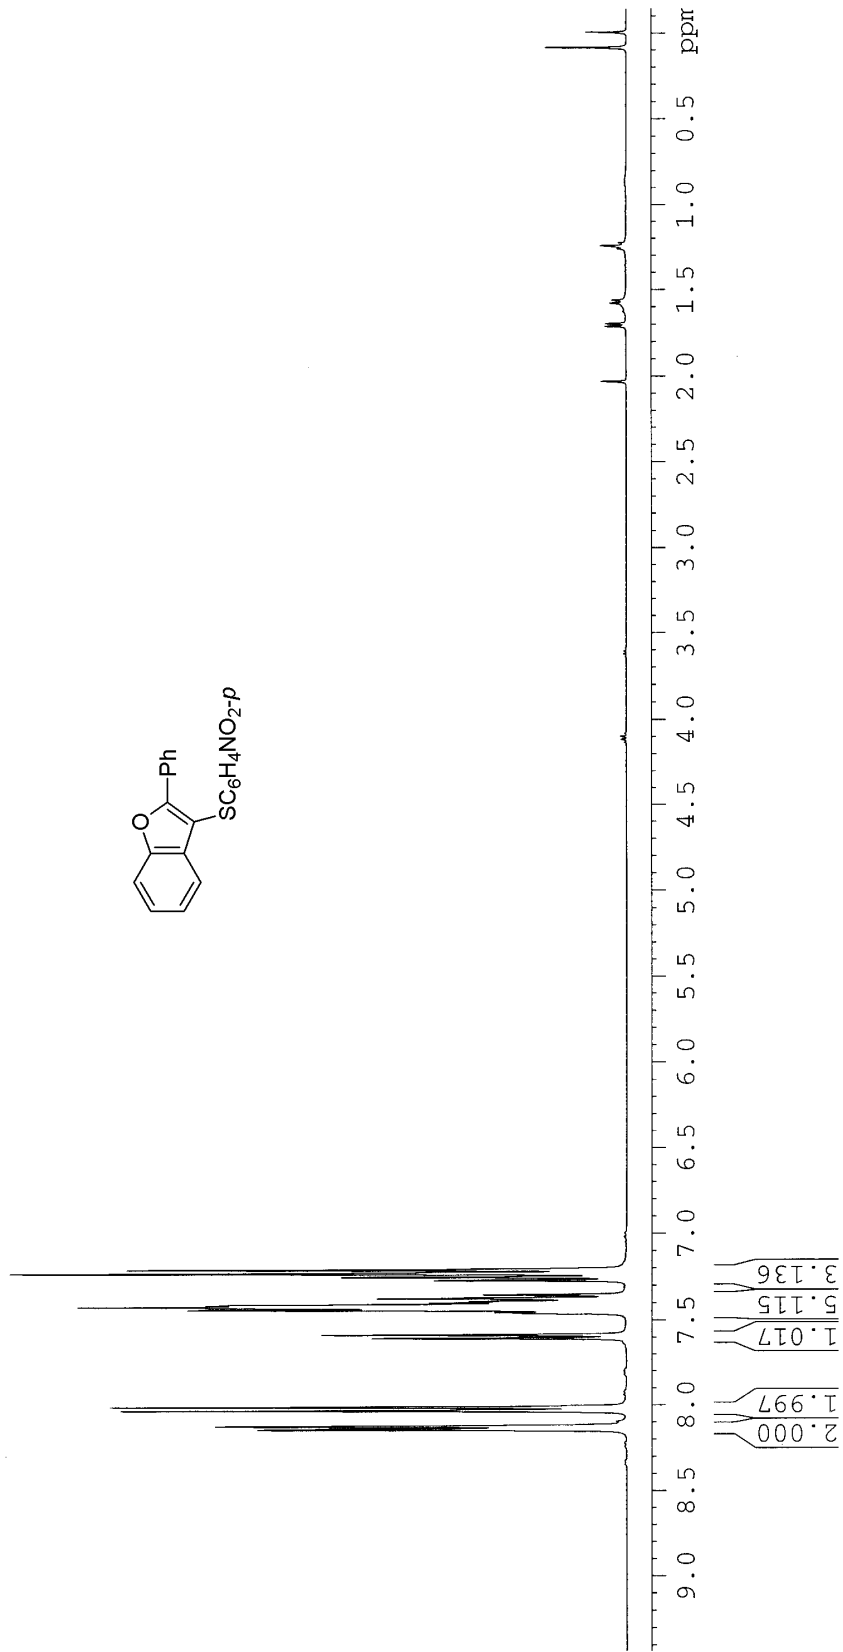

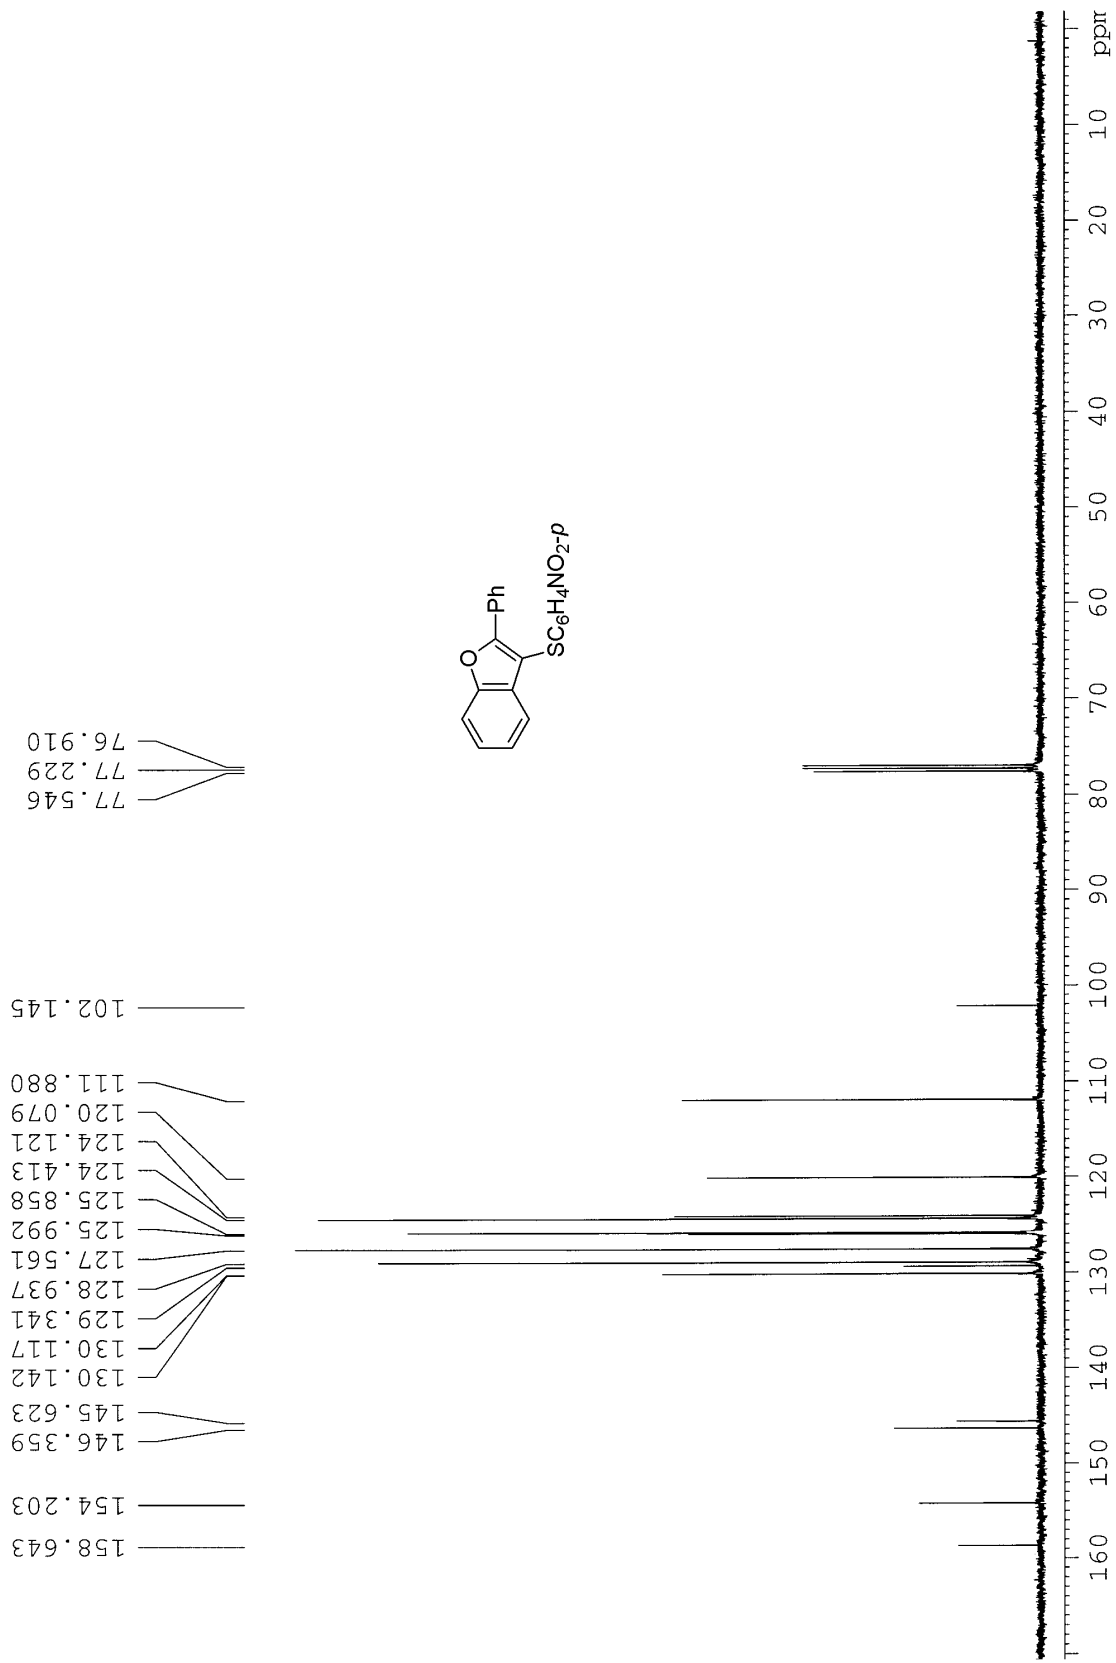

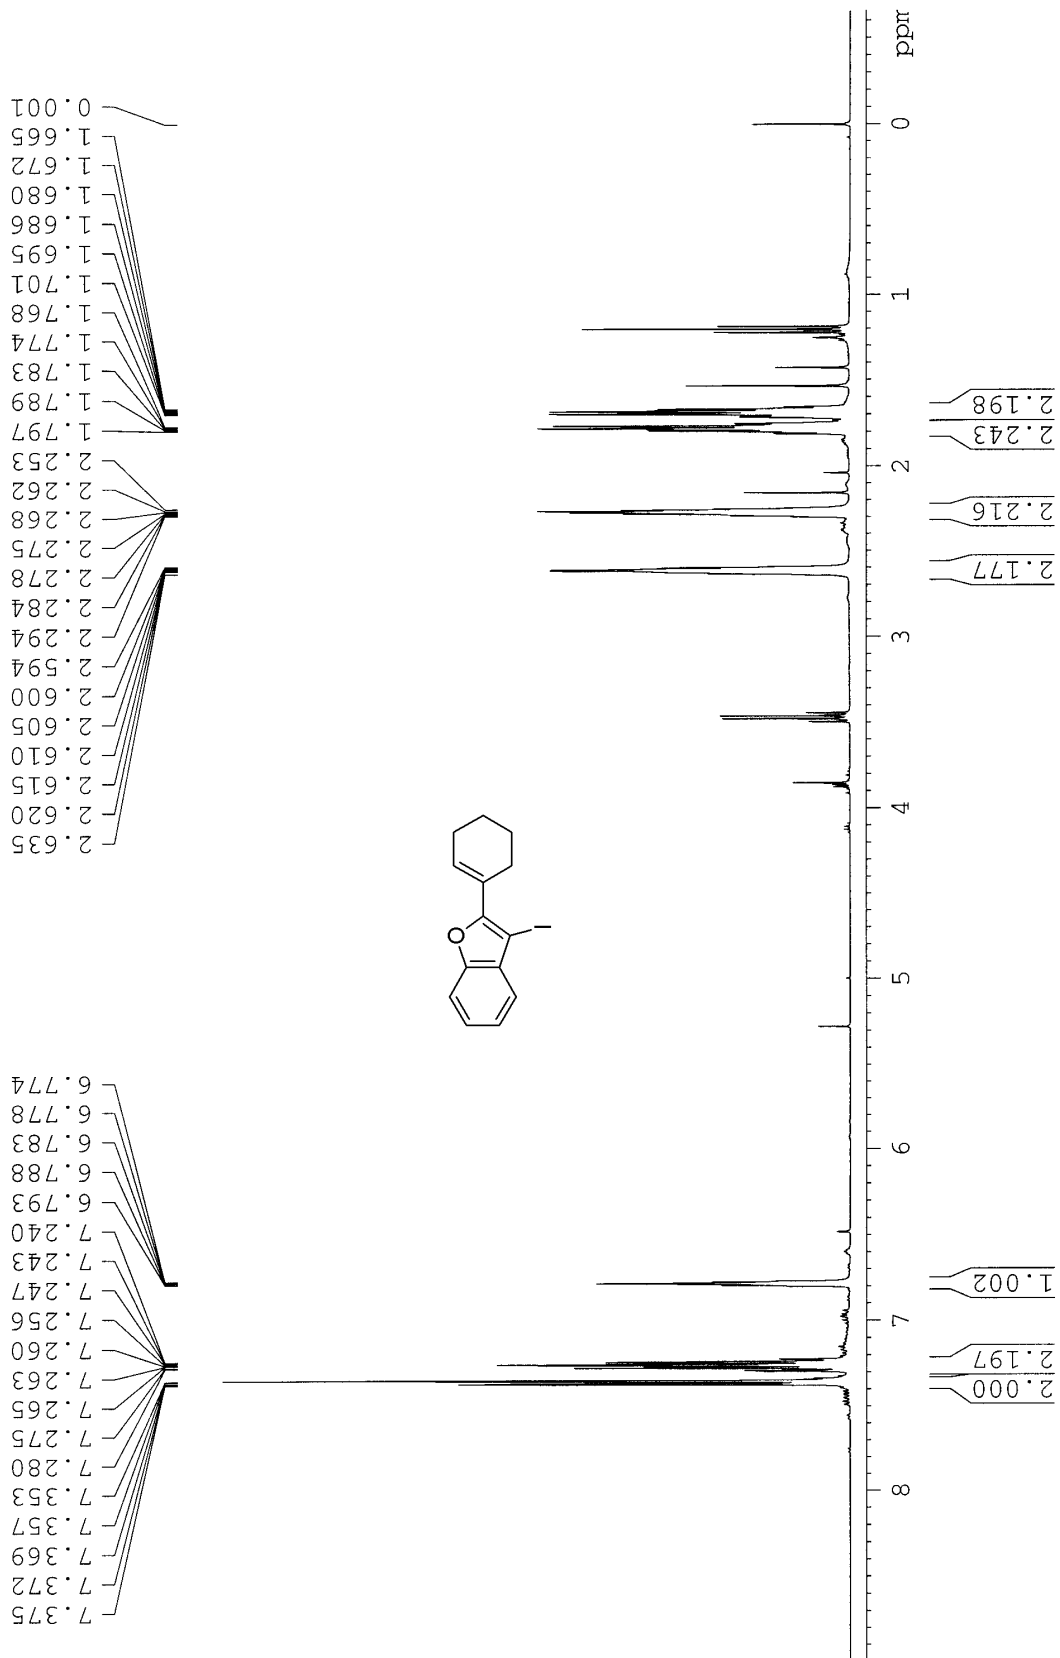

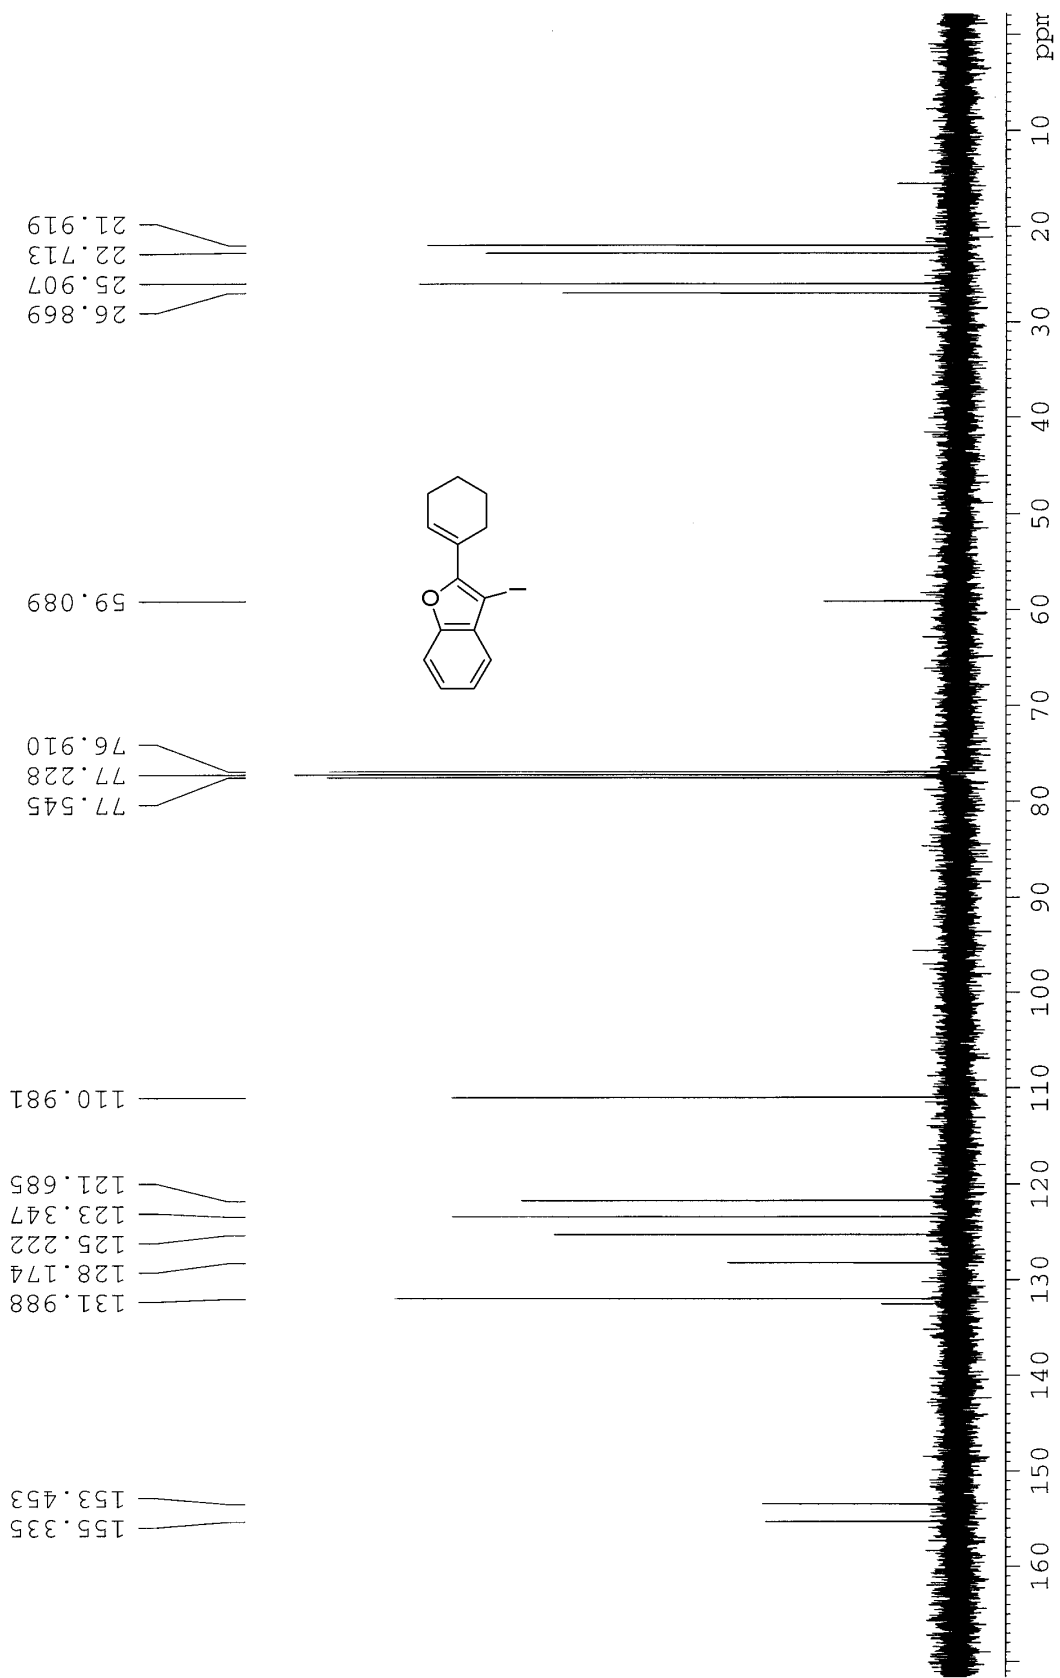

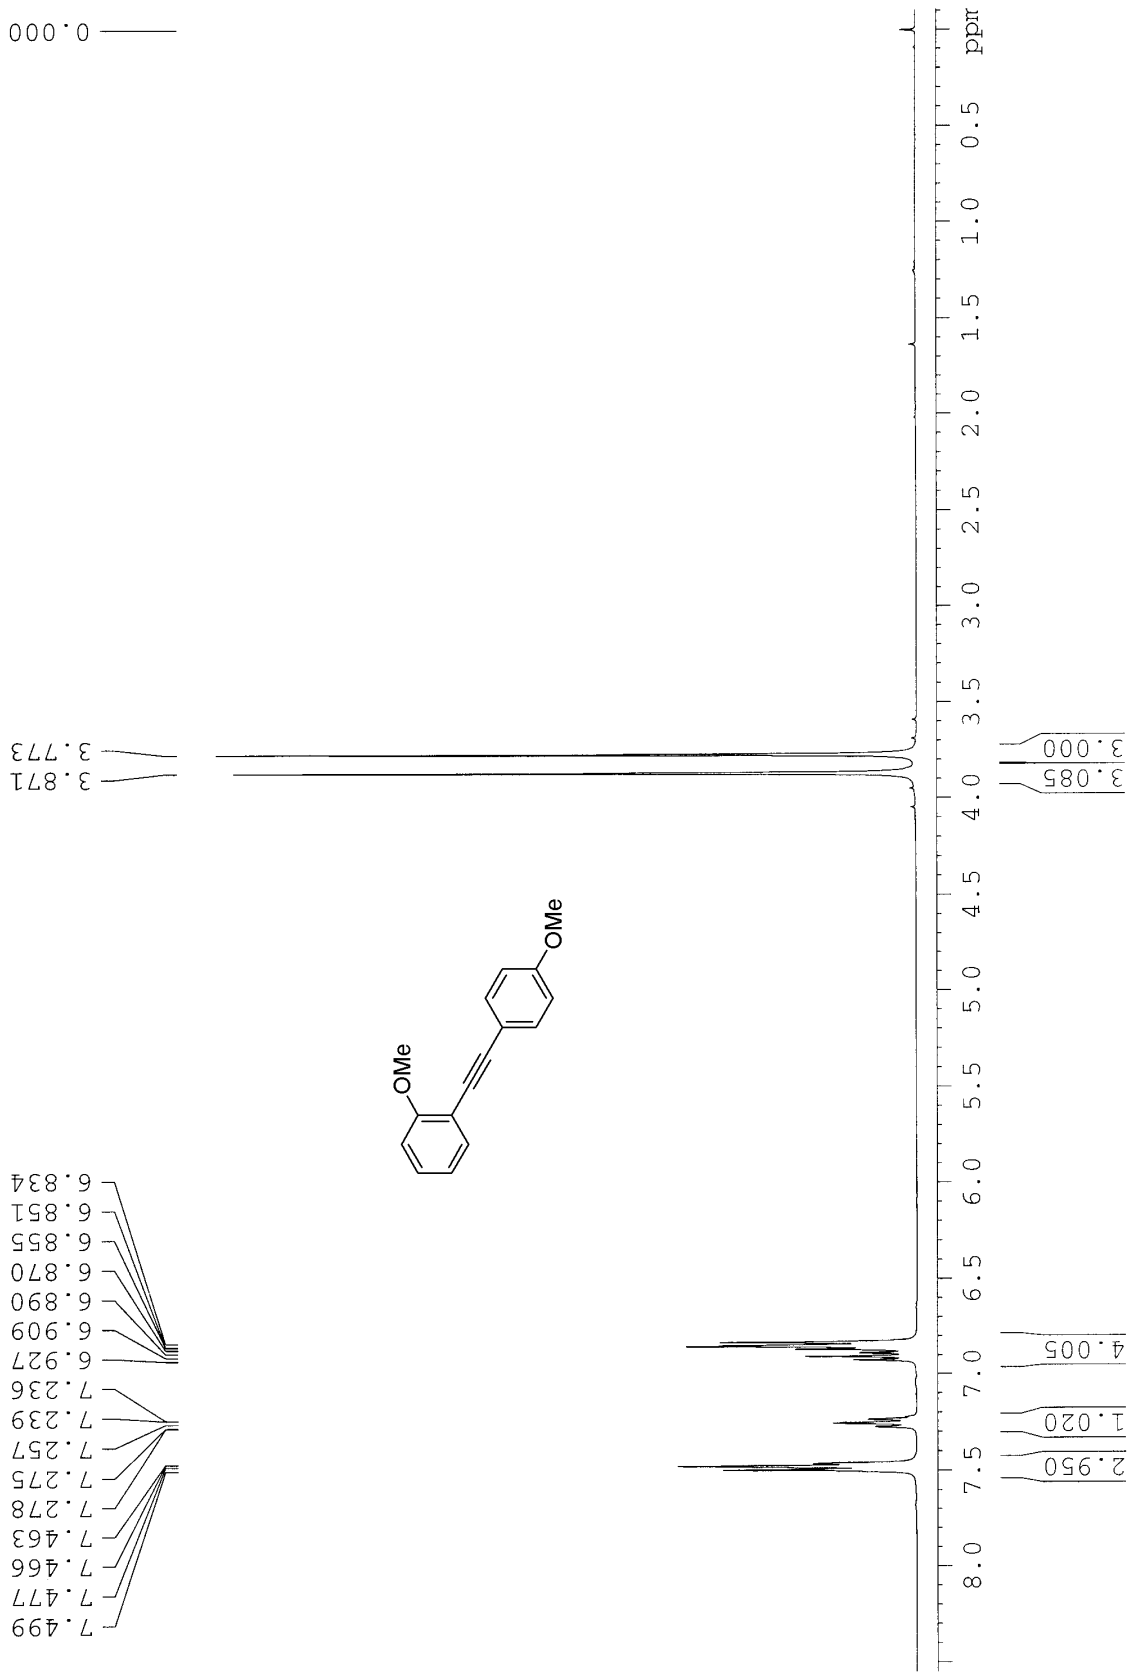

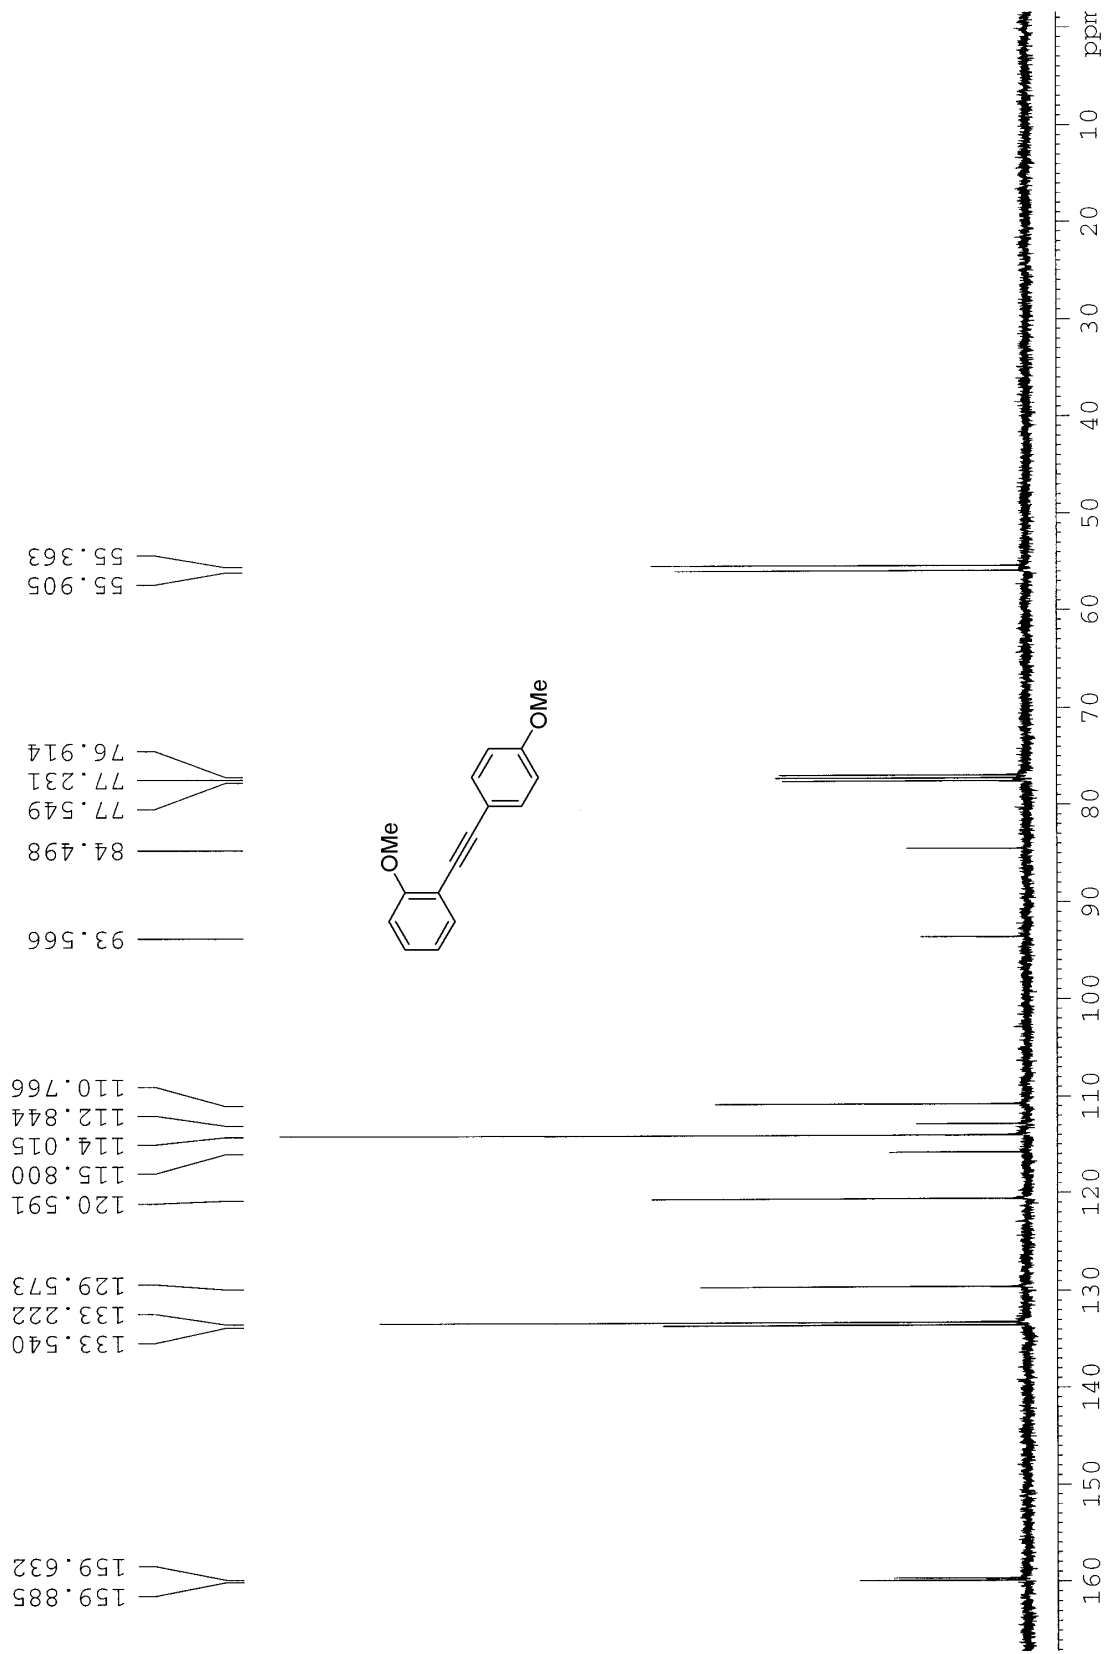

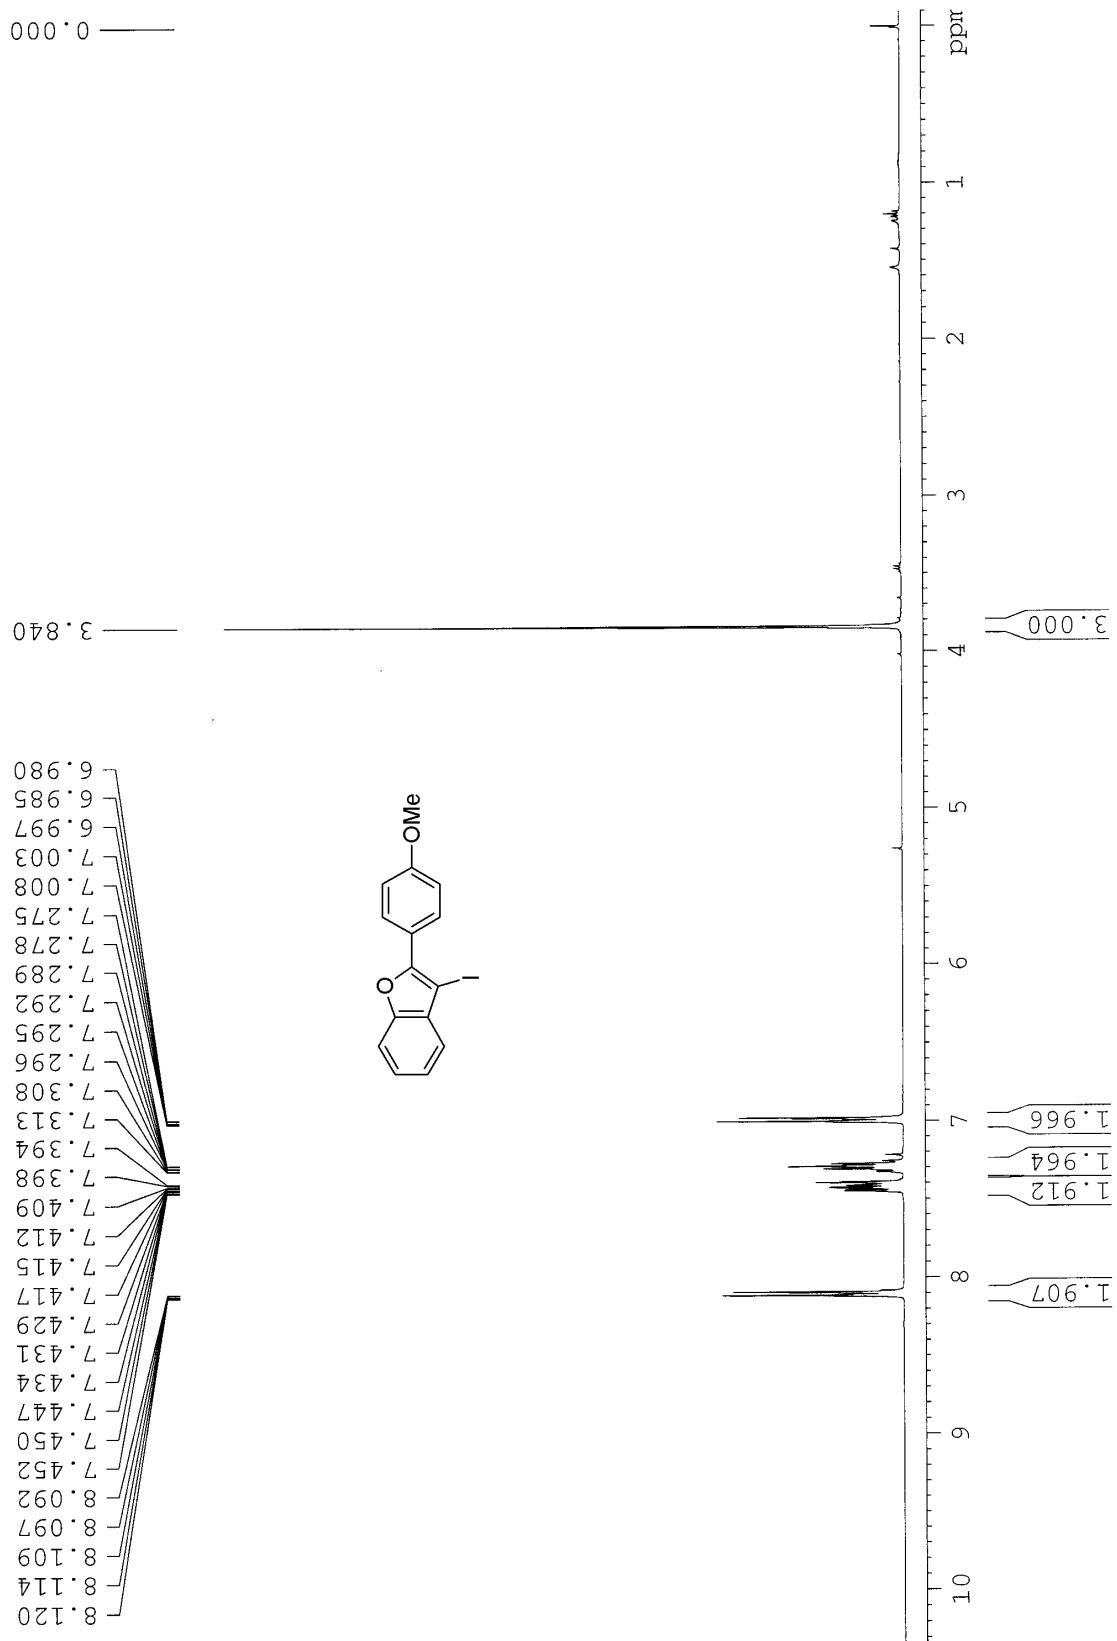

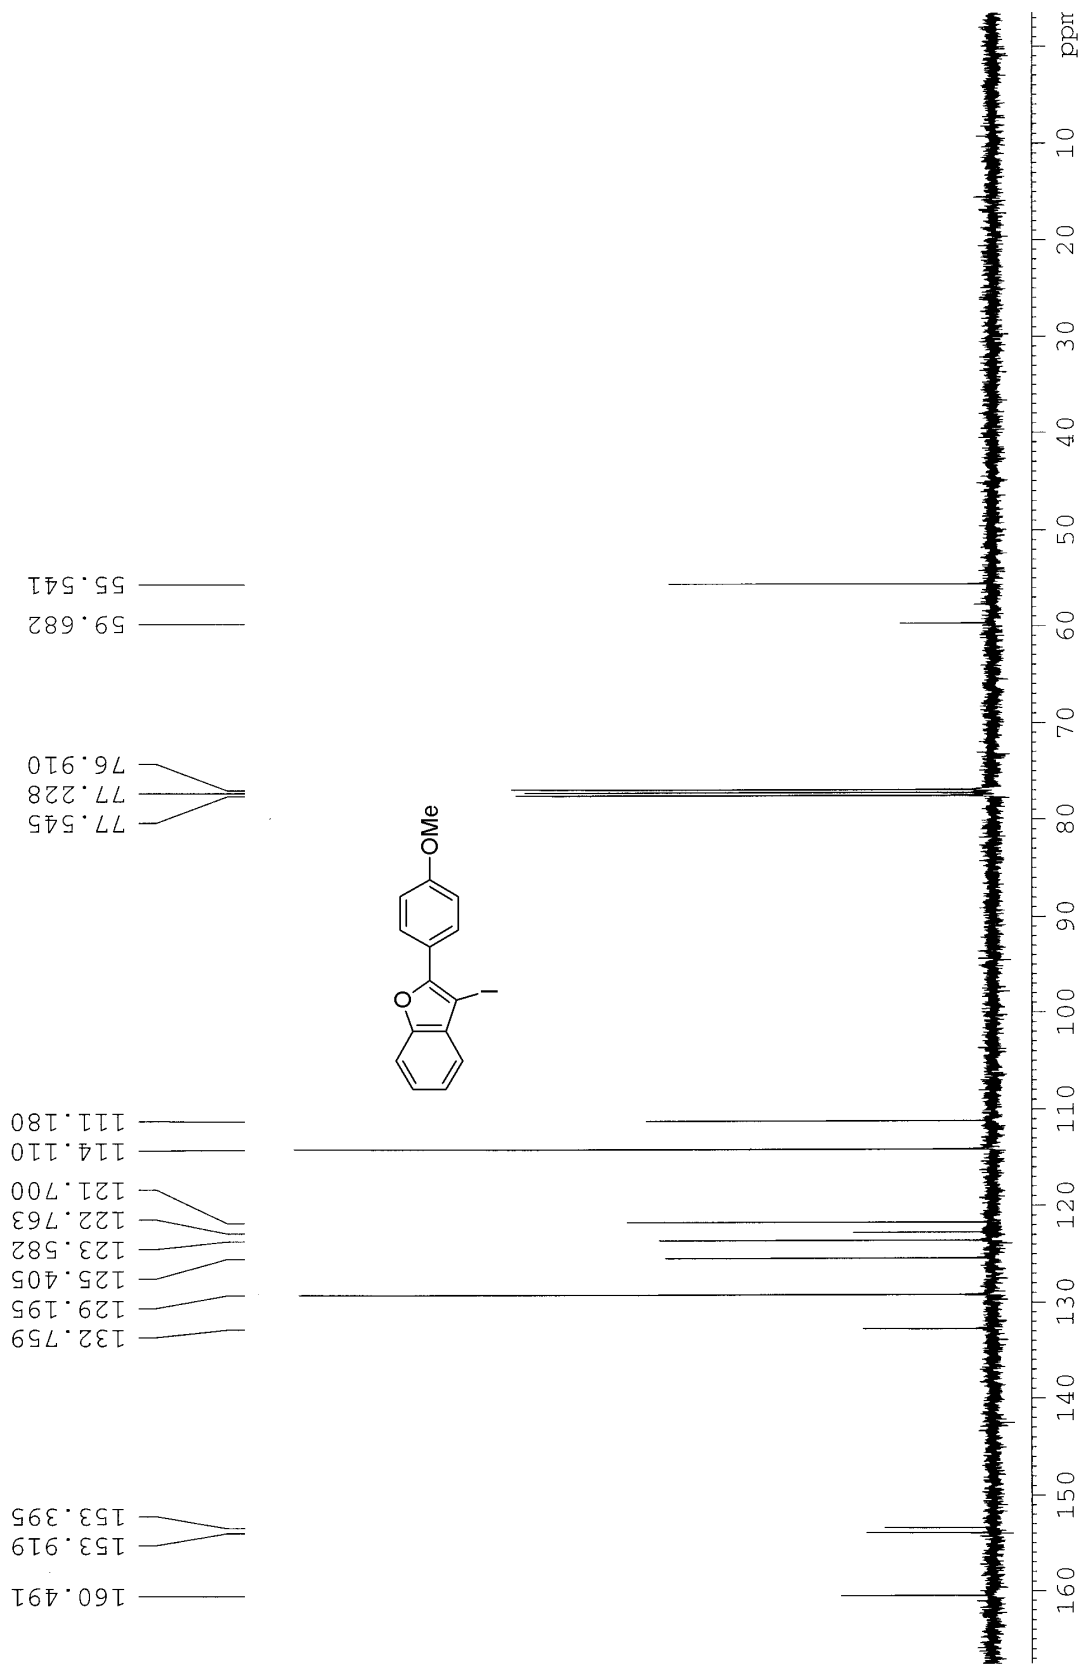



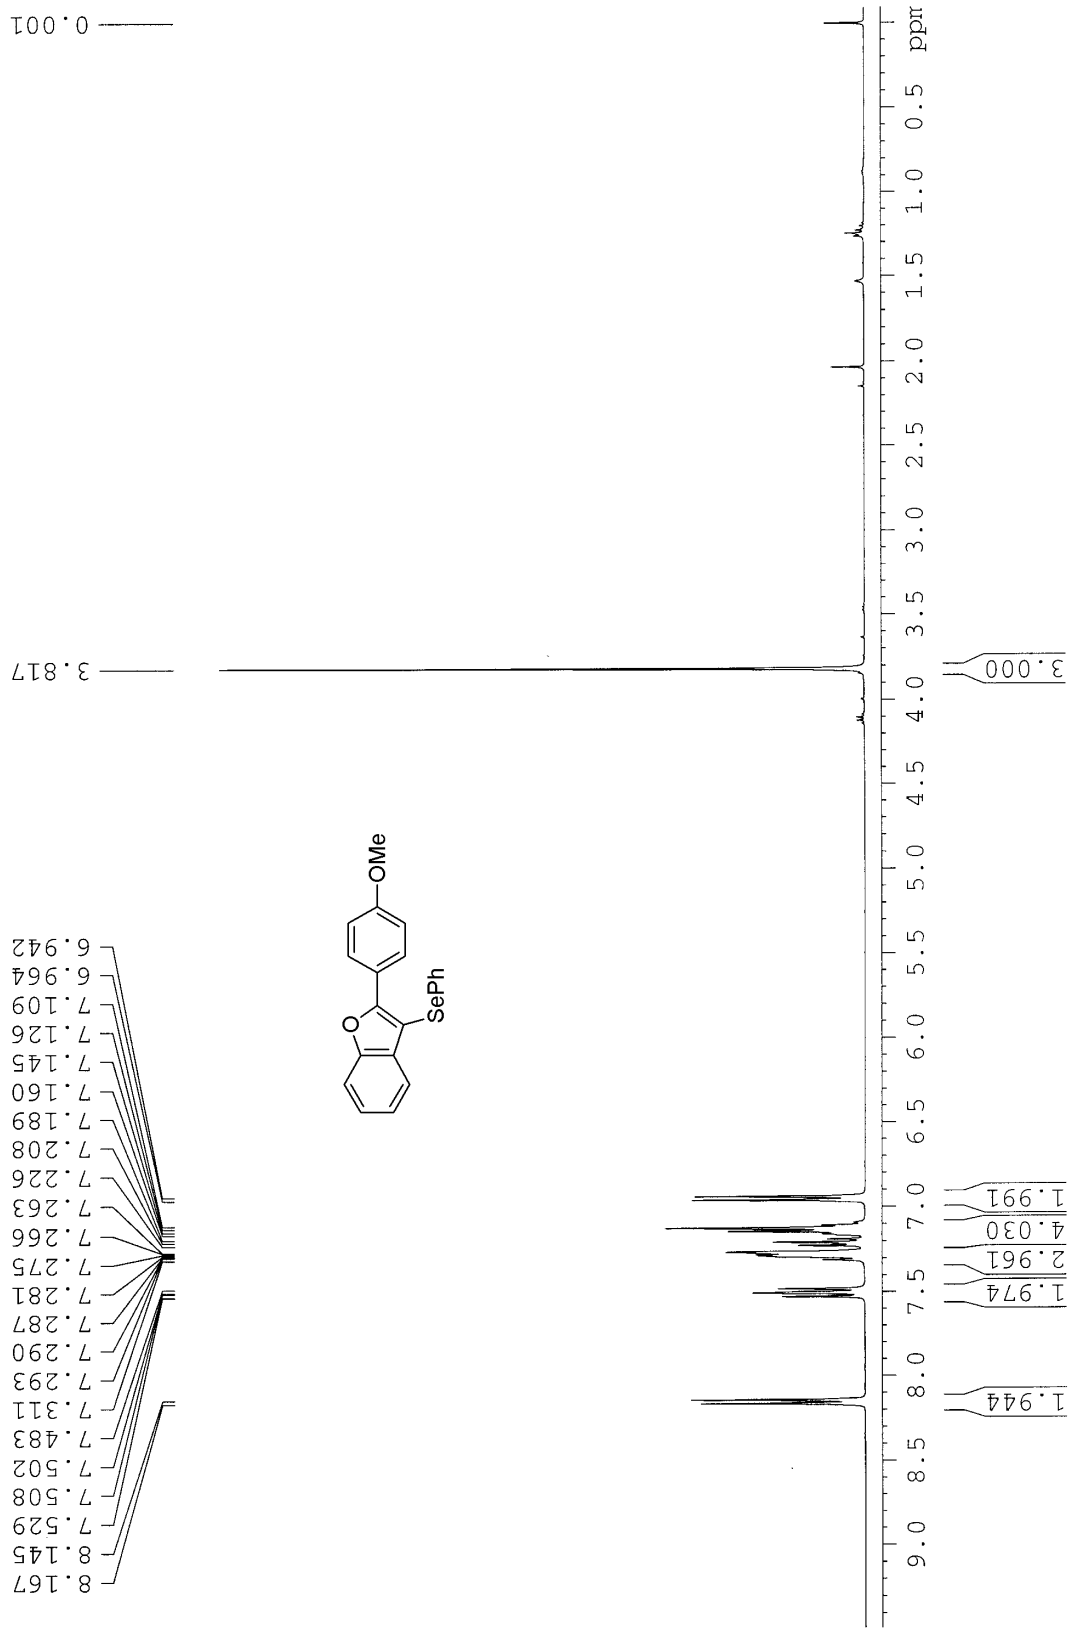

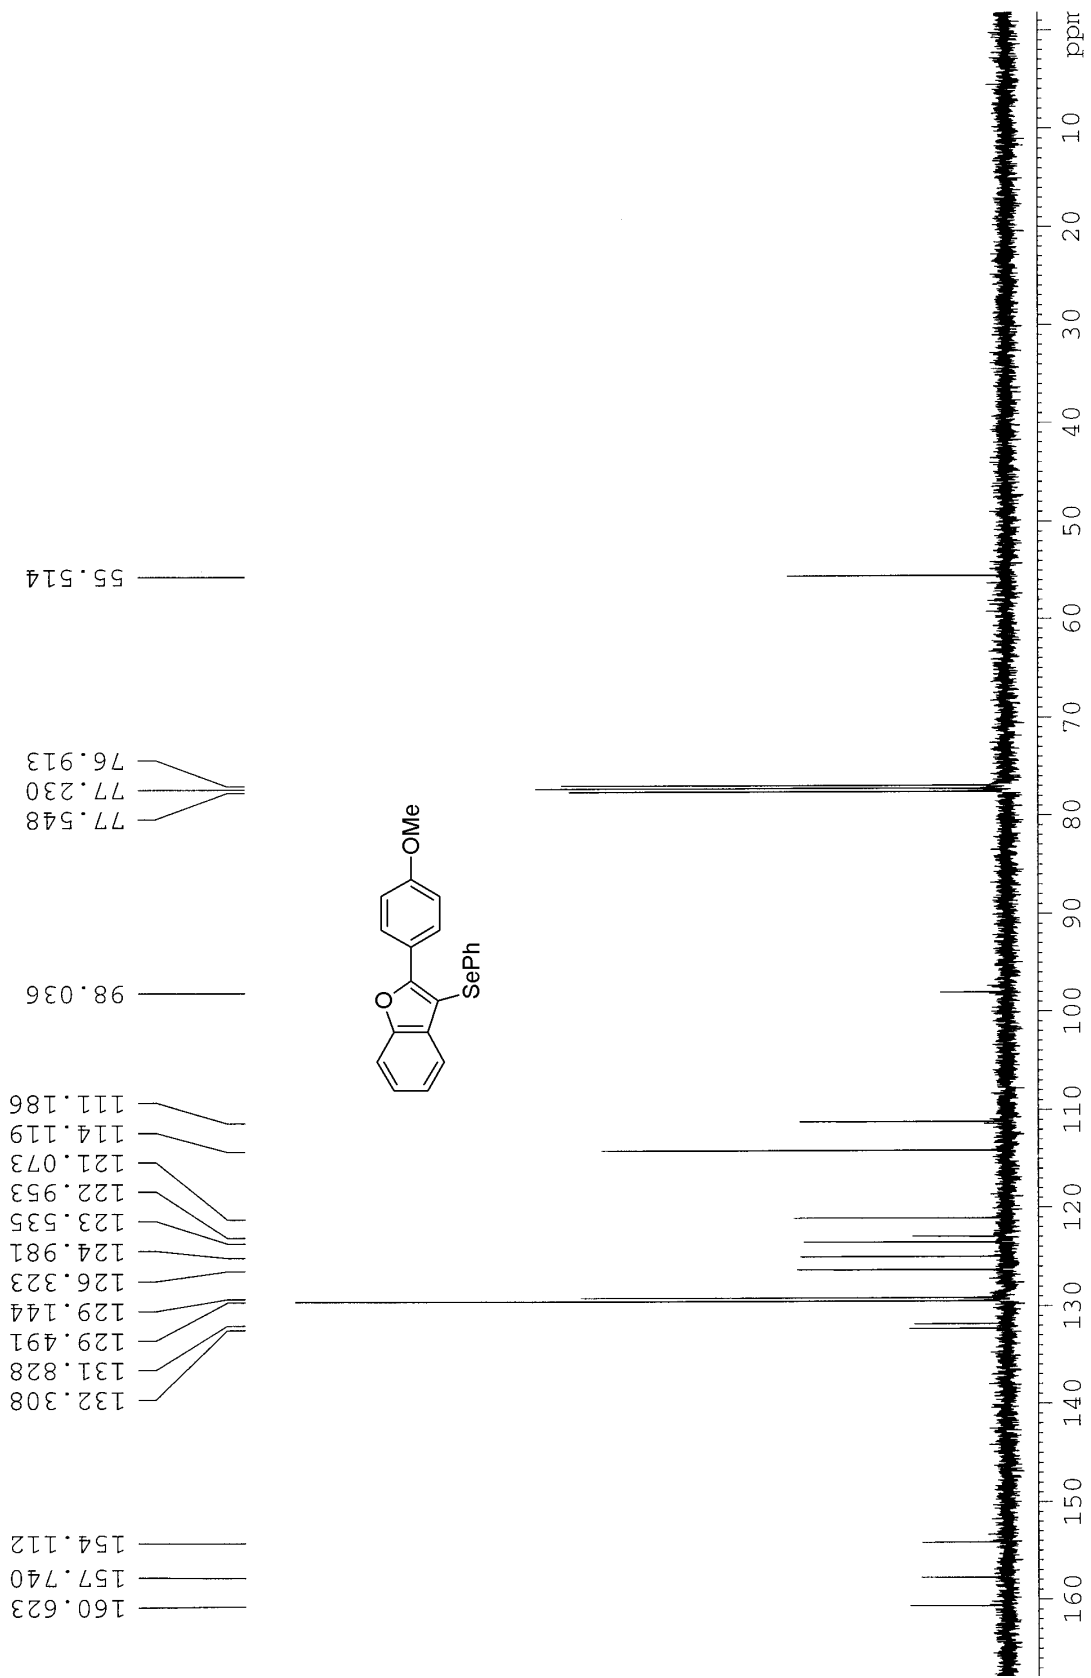

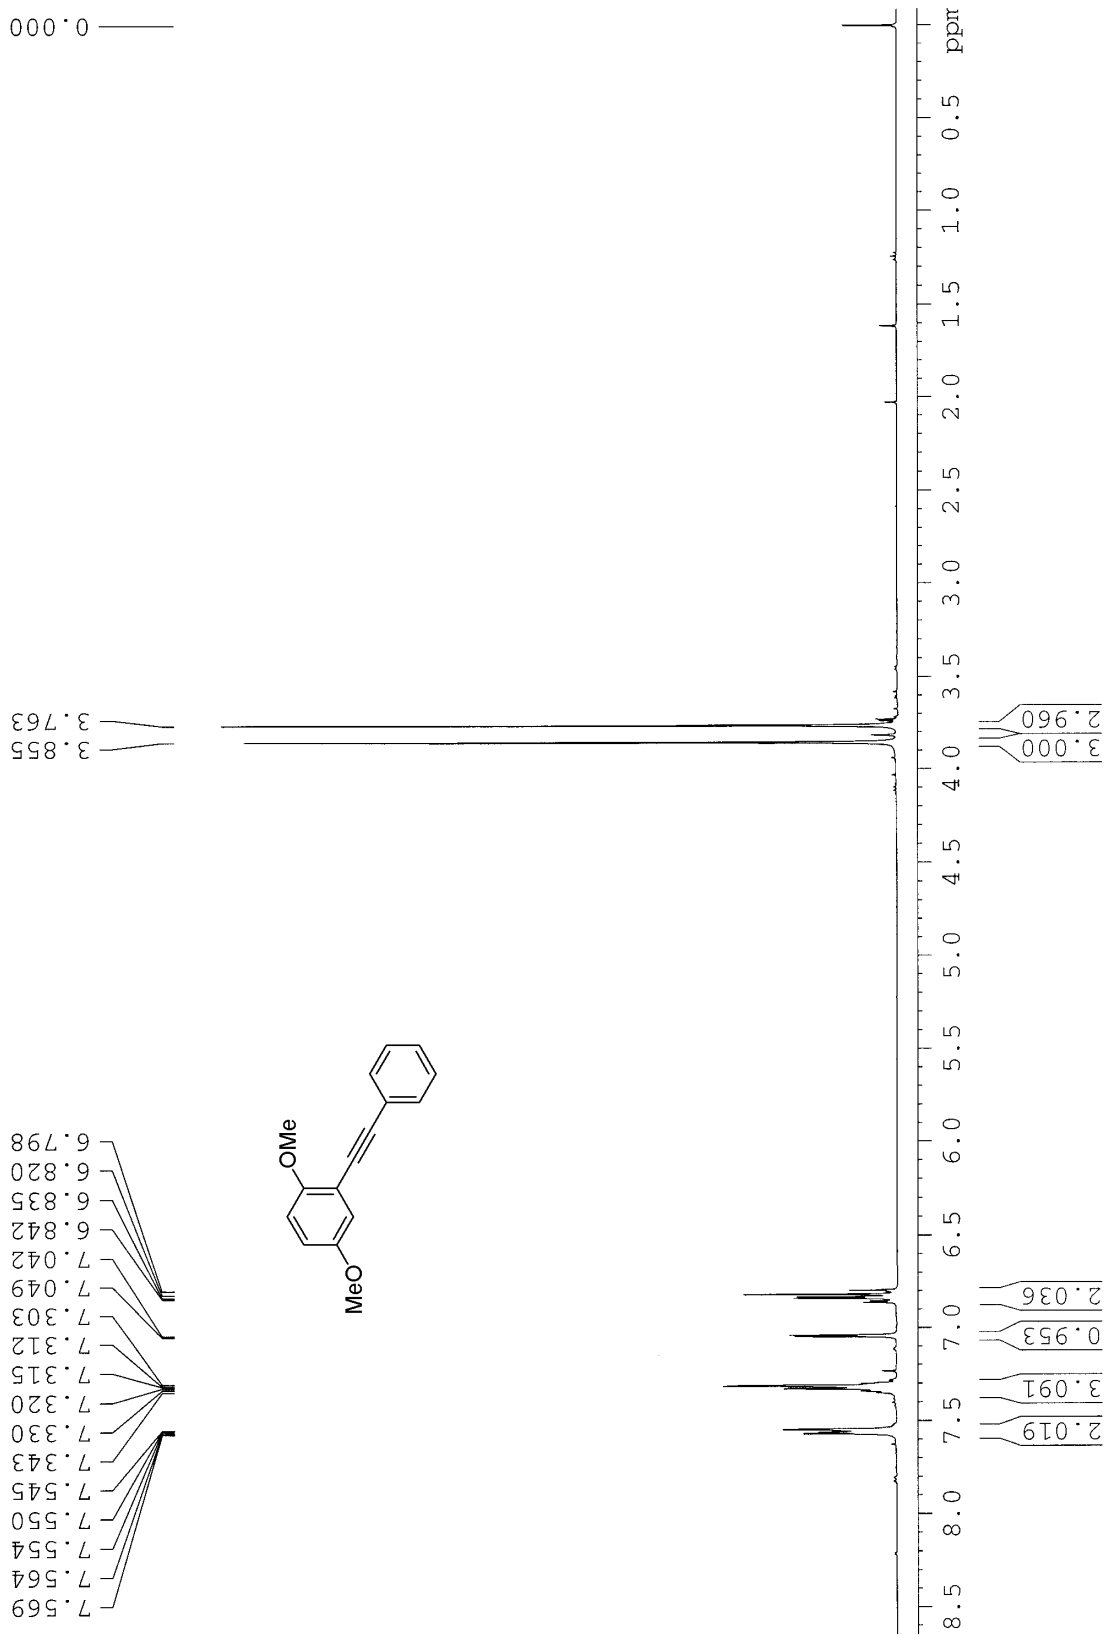

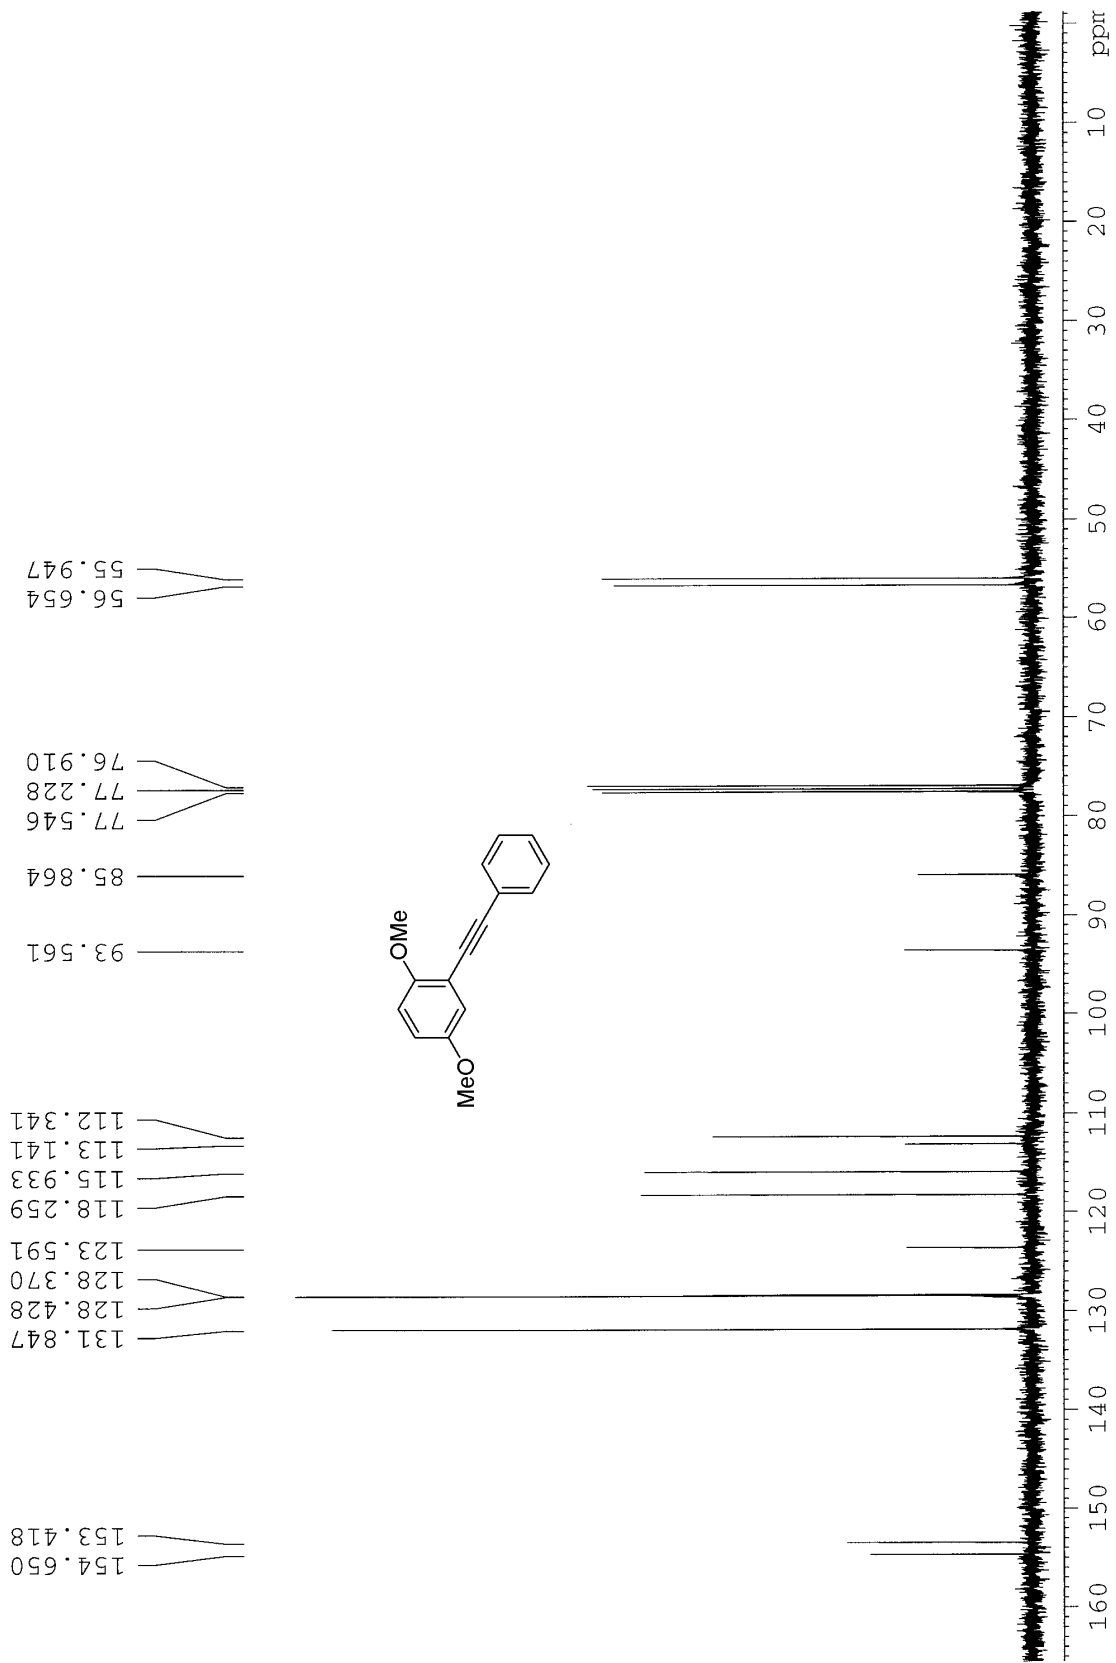

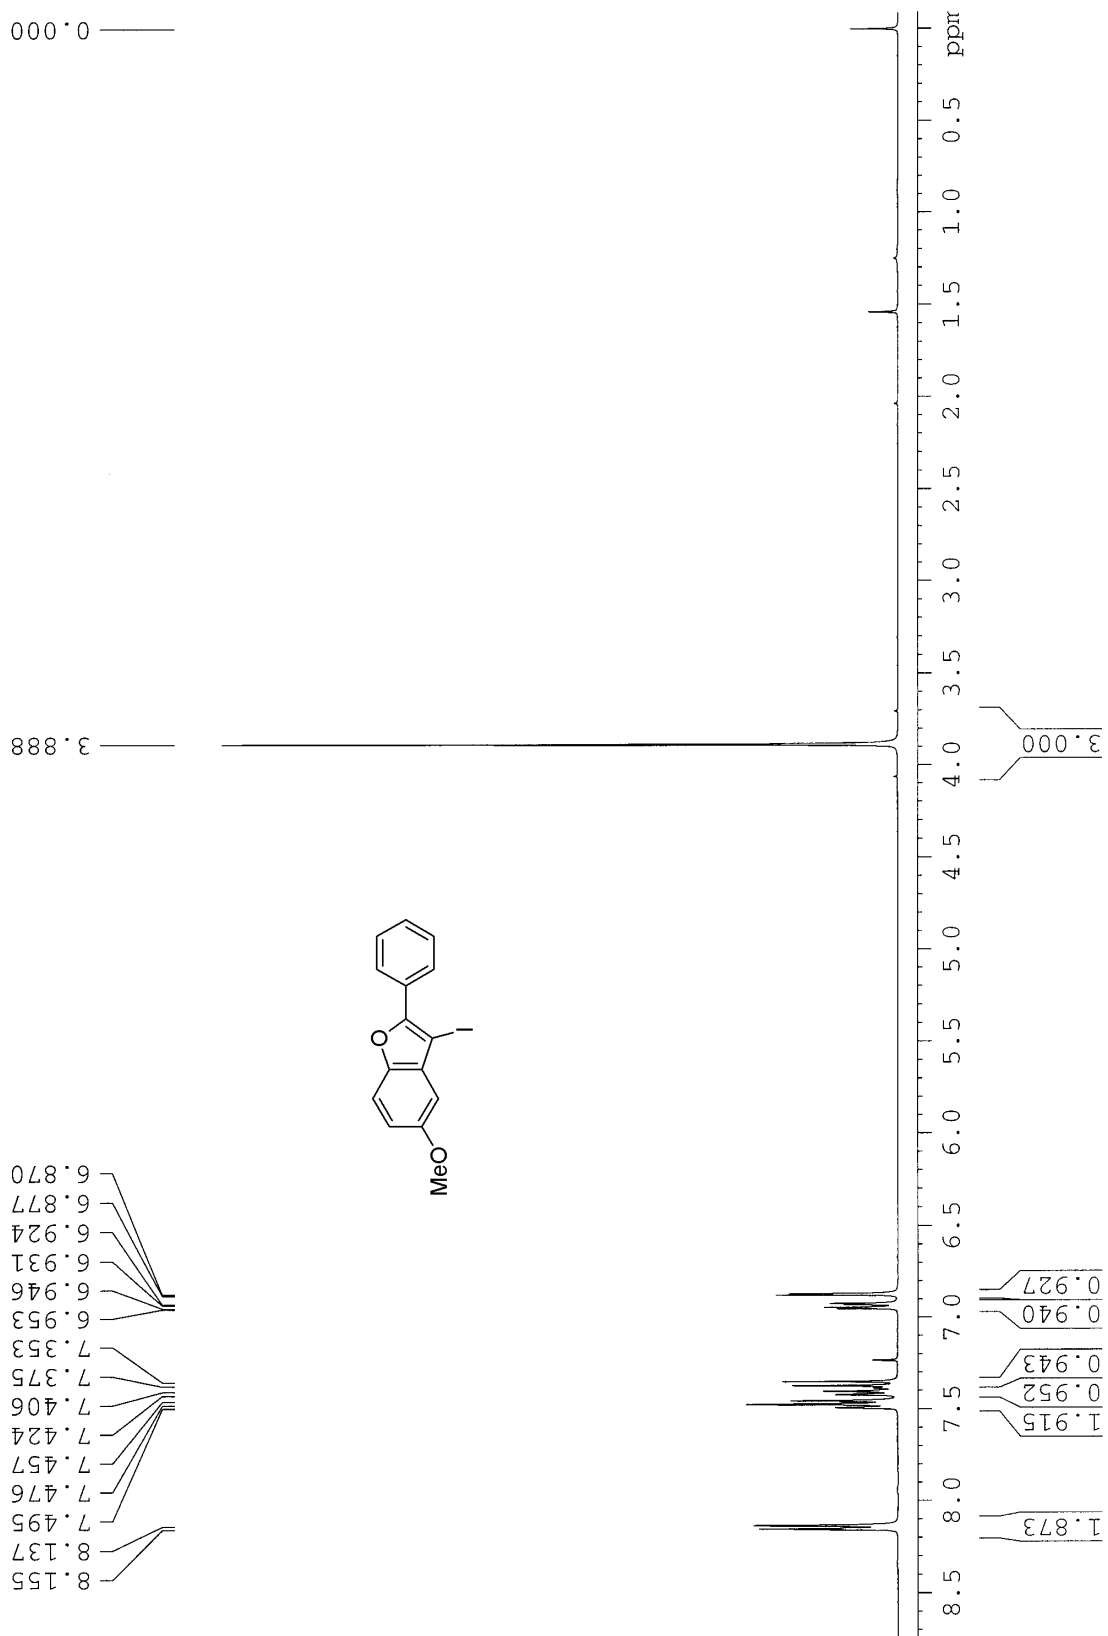

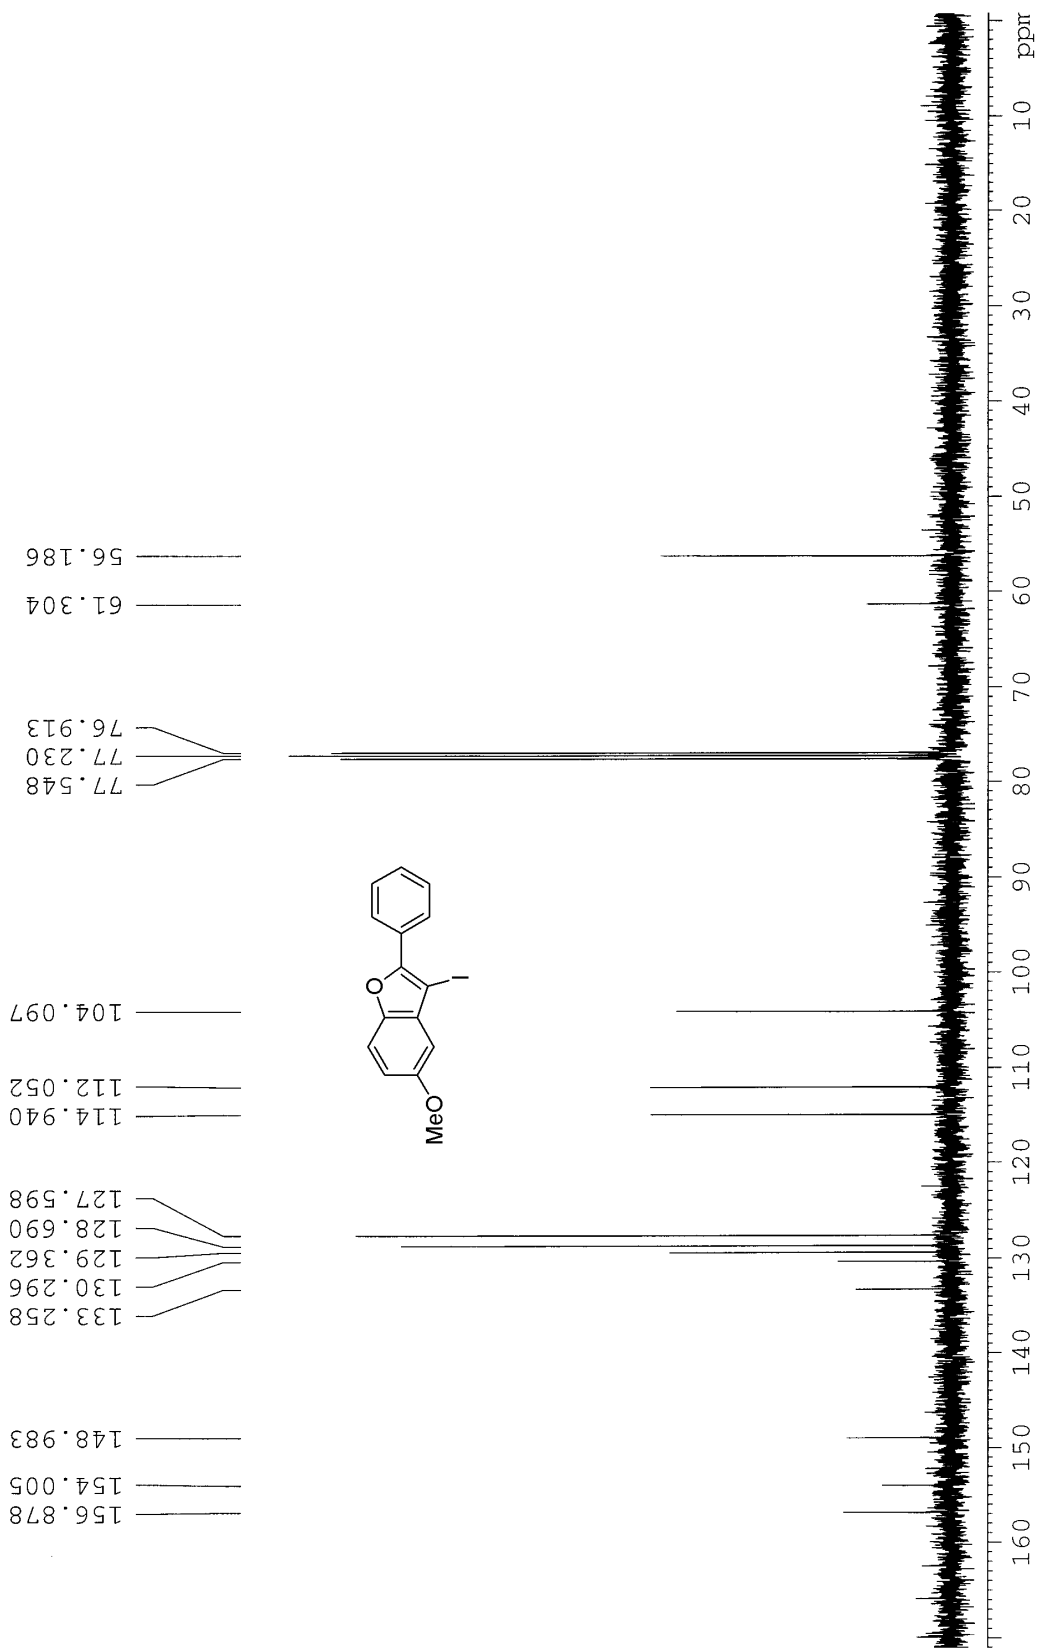

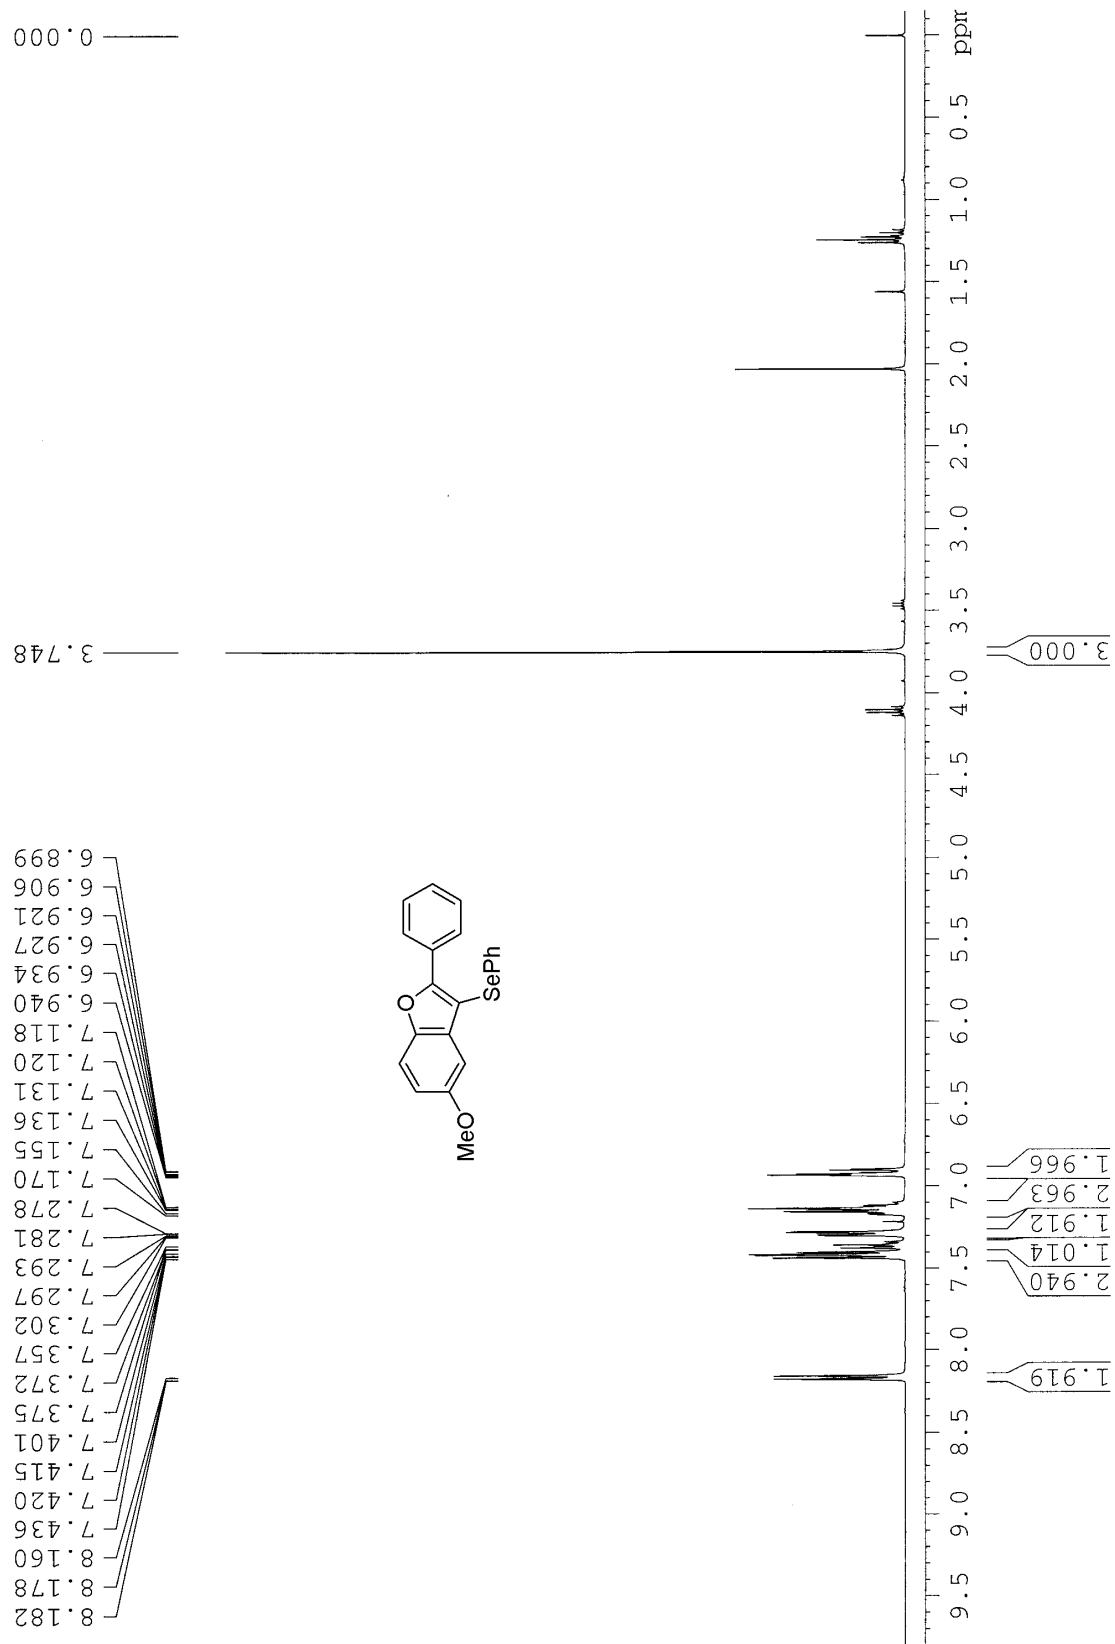

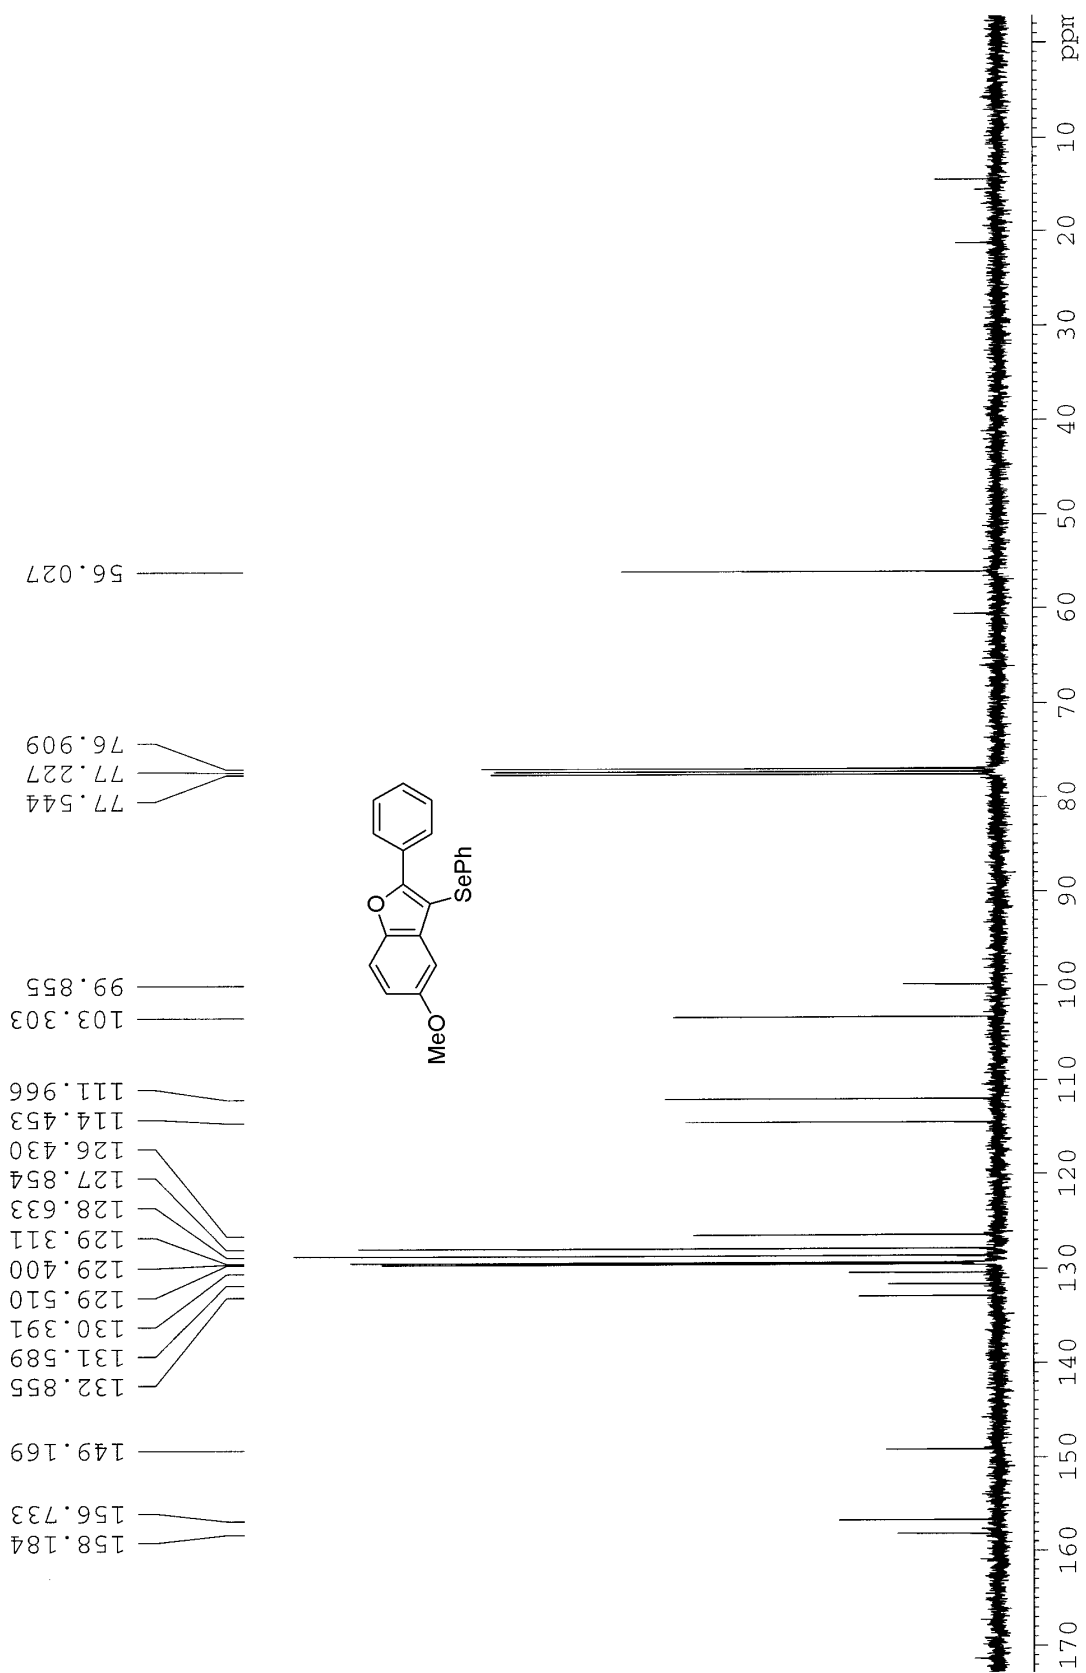



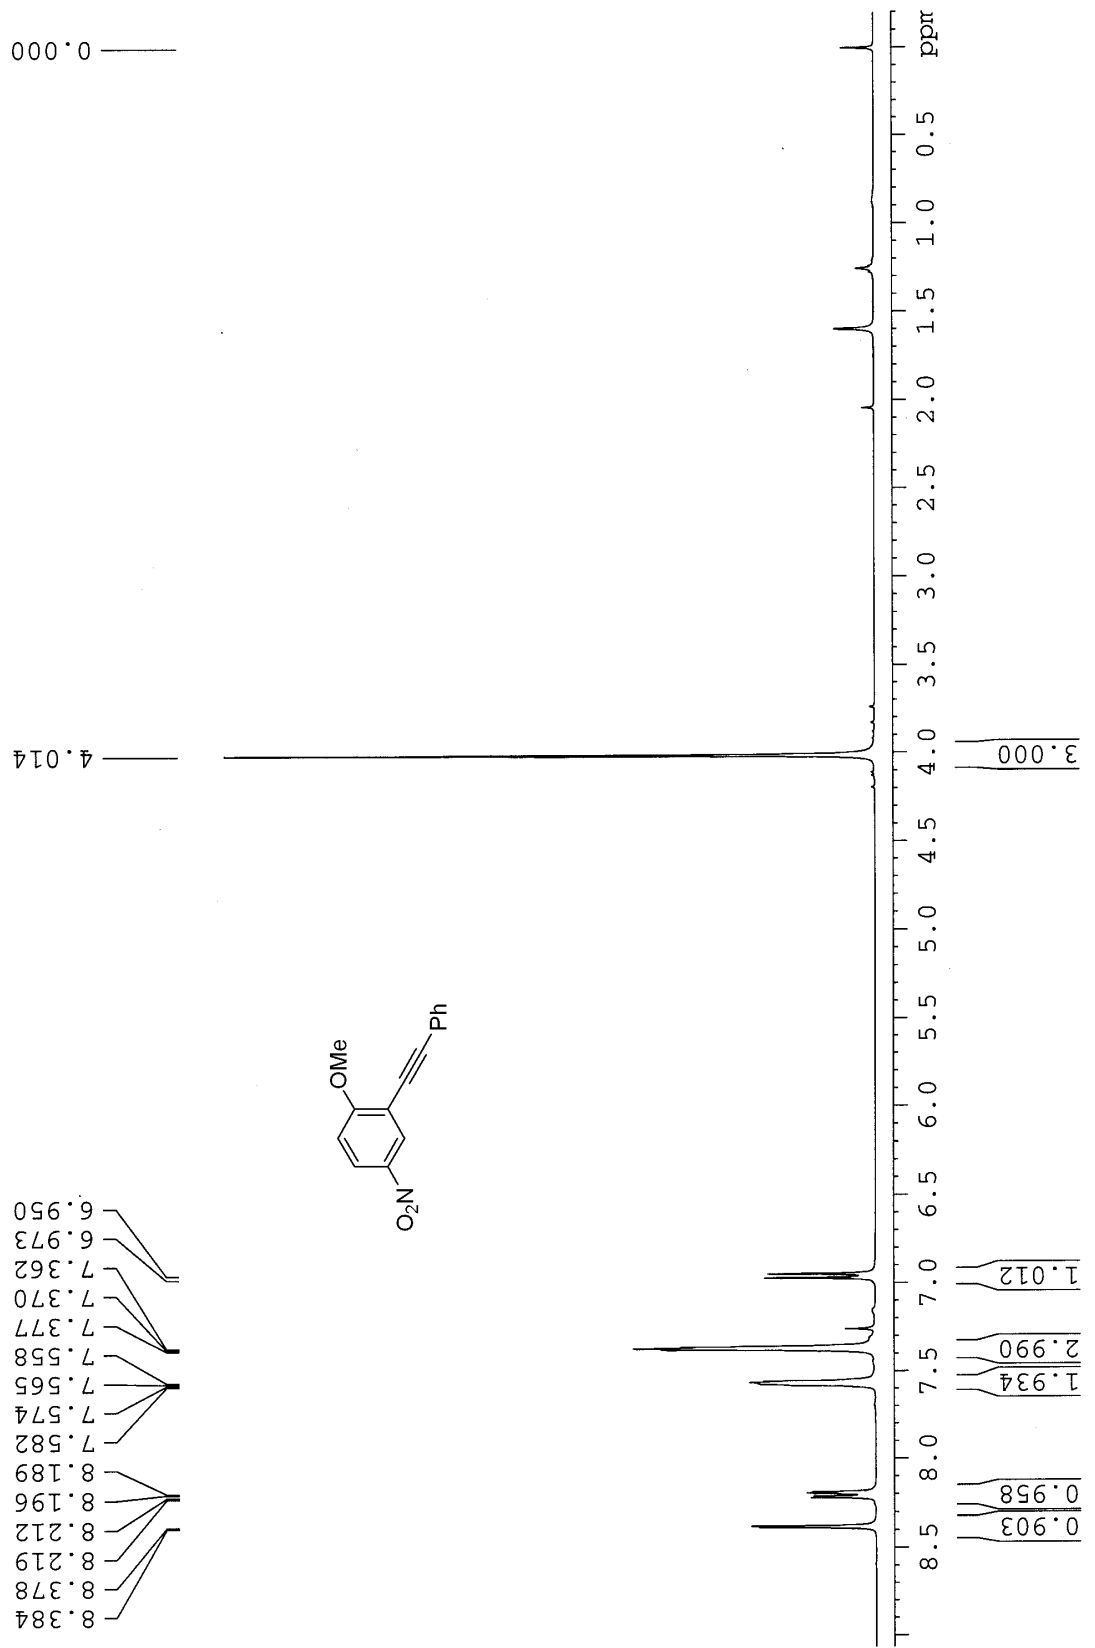

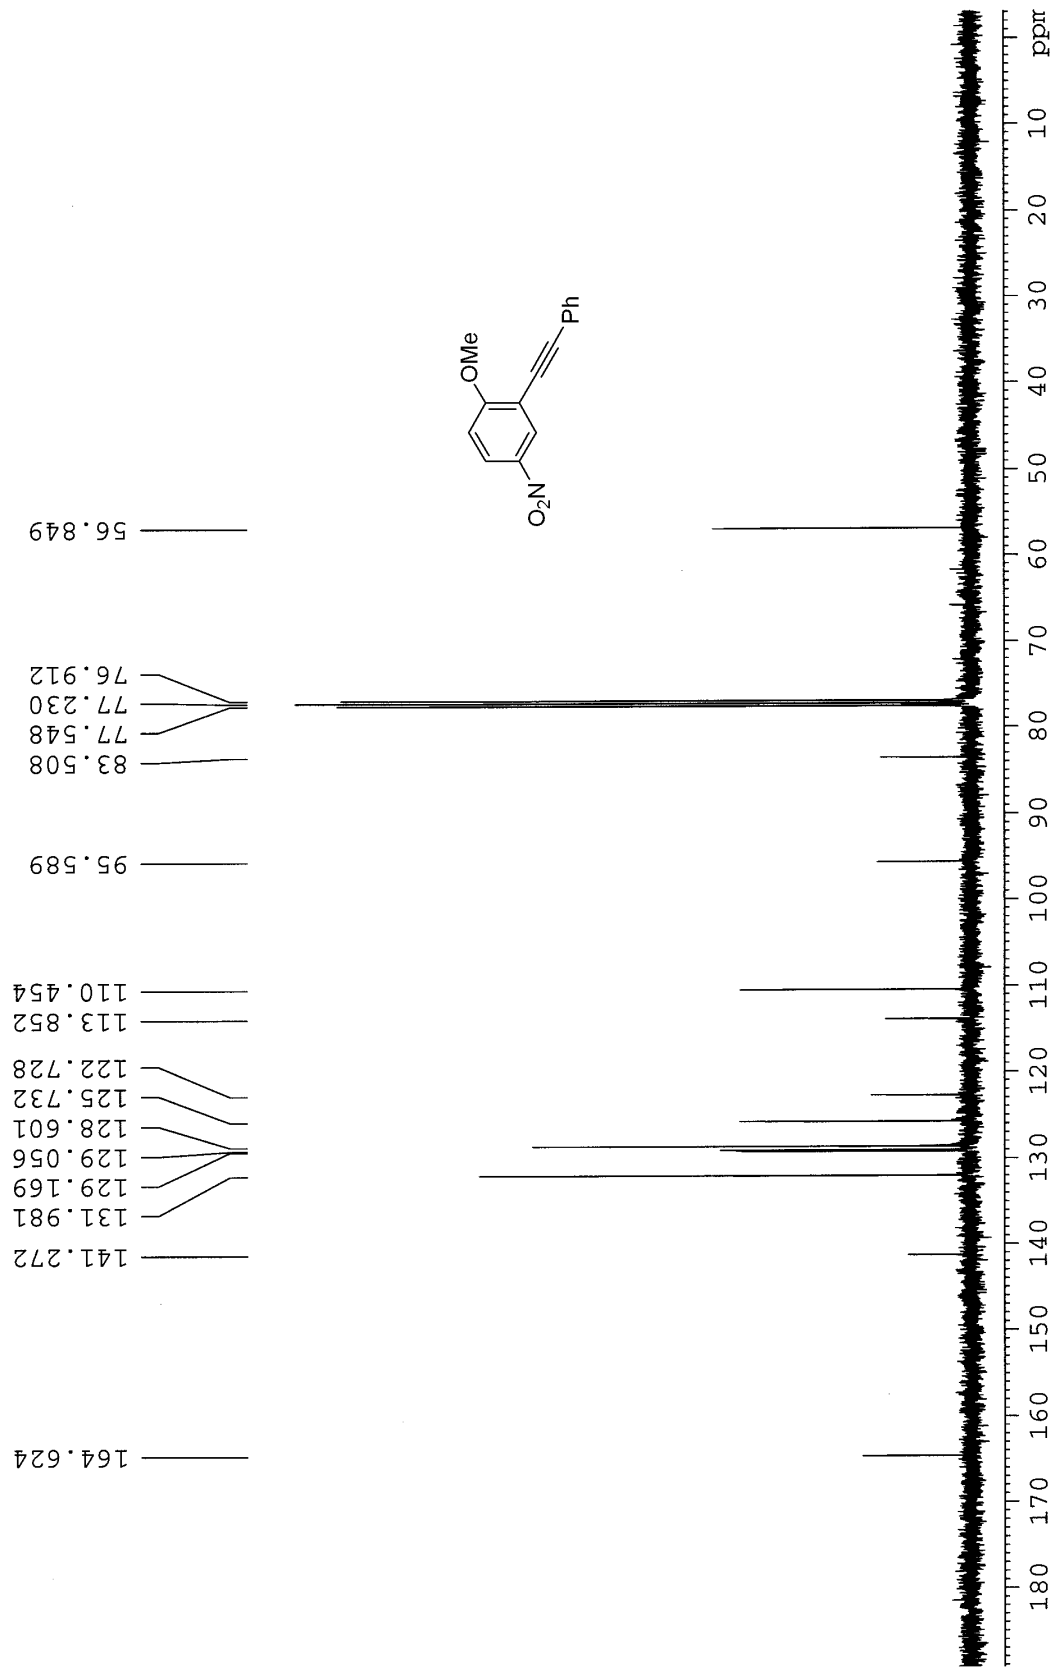

0.000

7.498  
7.504  
7.511  
7.523  
7.528  
7.530  
7.552  
7.582  
8.151  
8.156  
8.161  
8.177  
8.183  
8.246  
8.254  
8.276  
8.284  
8.361  
8.369

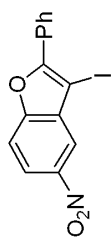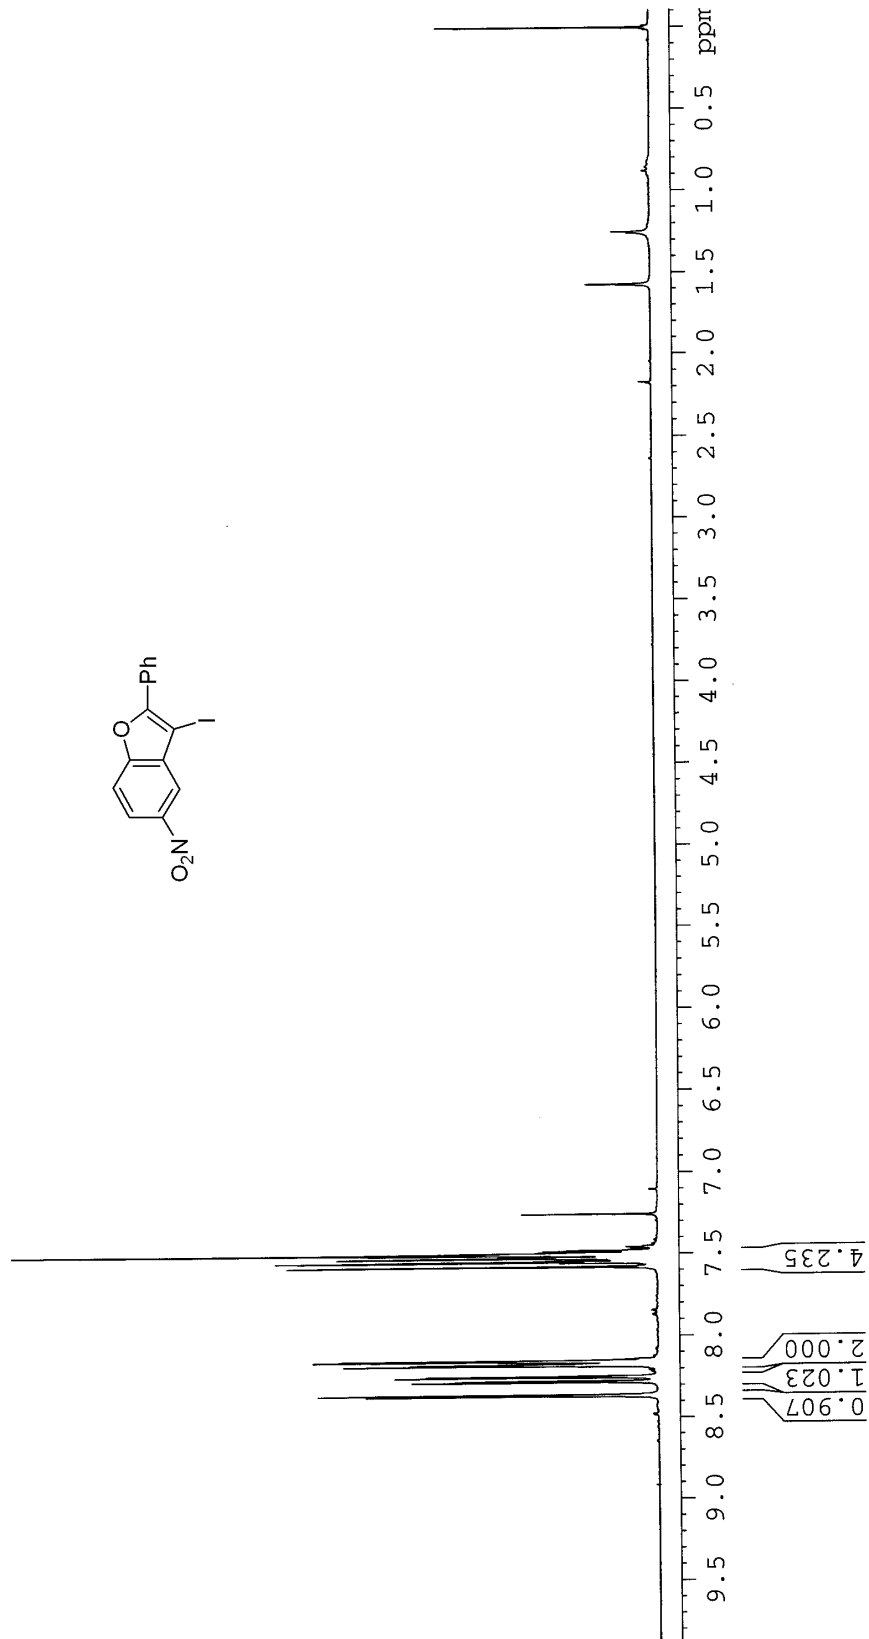

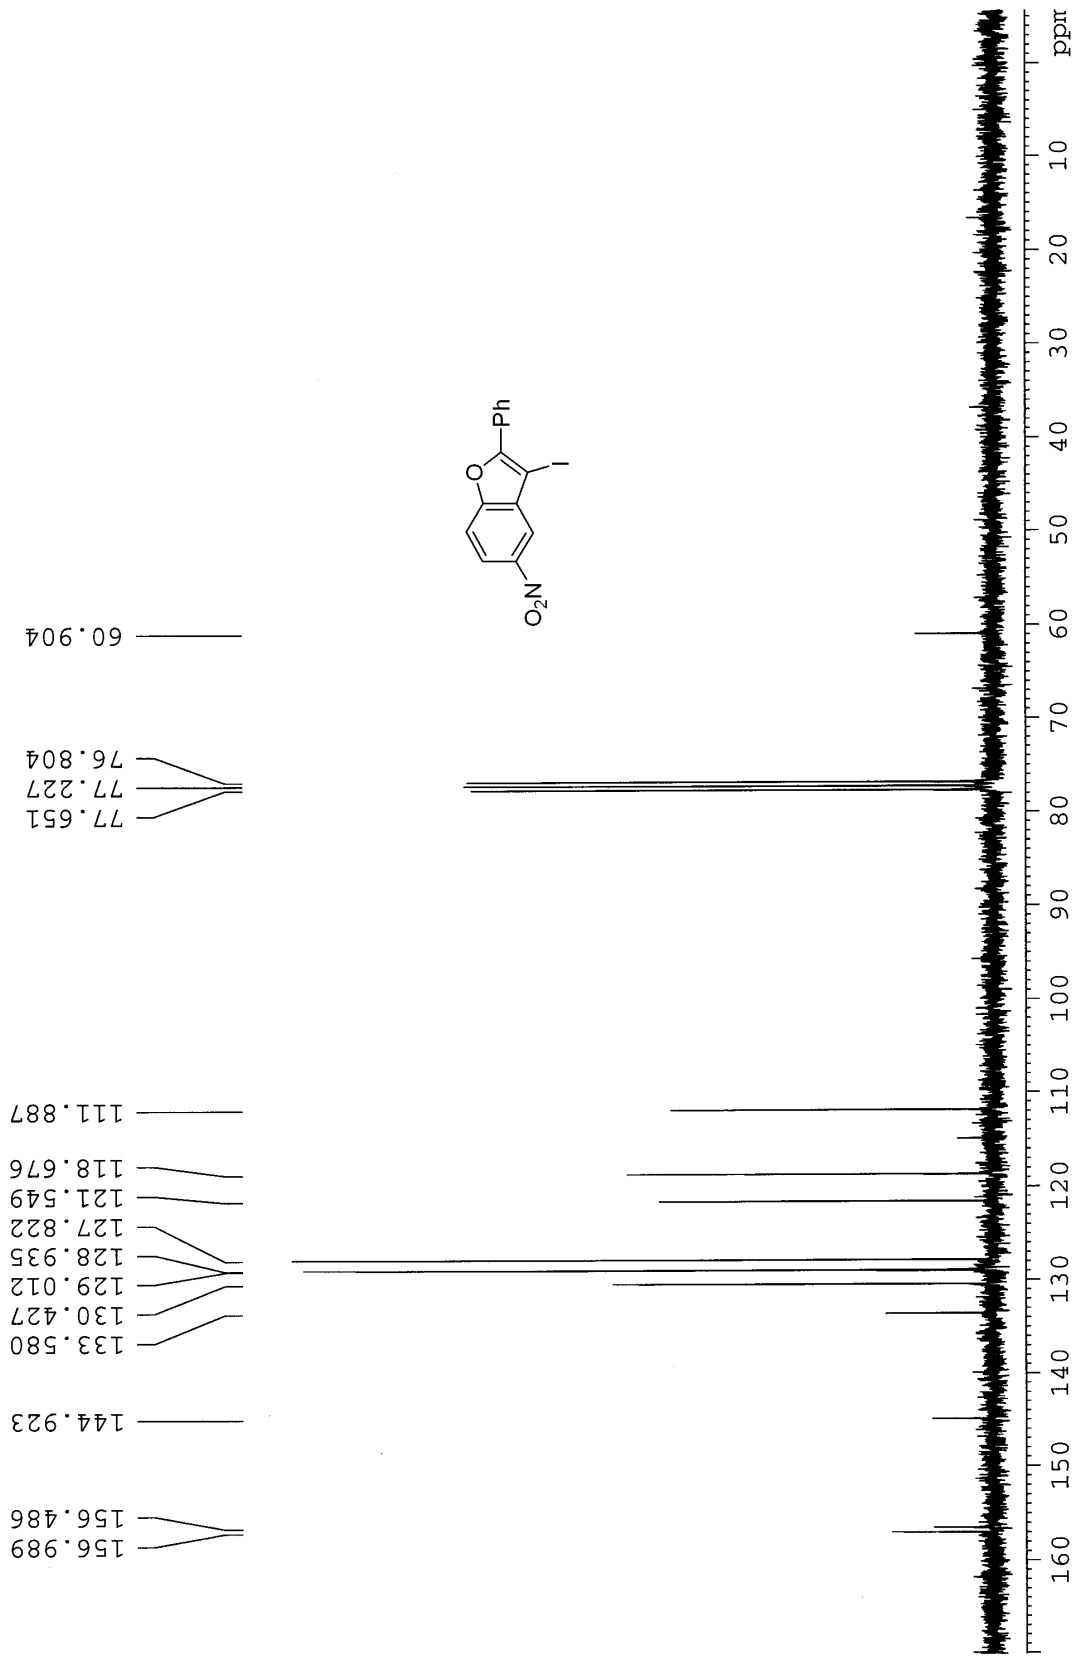

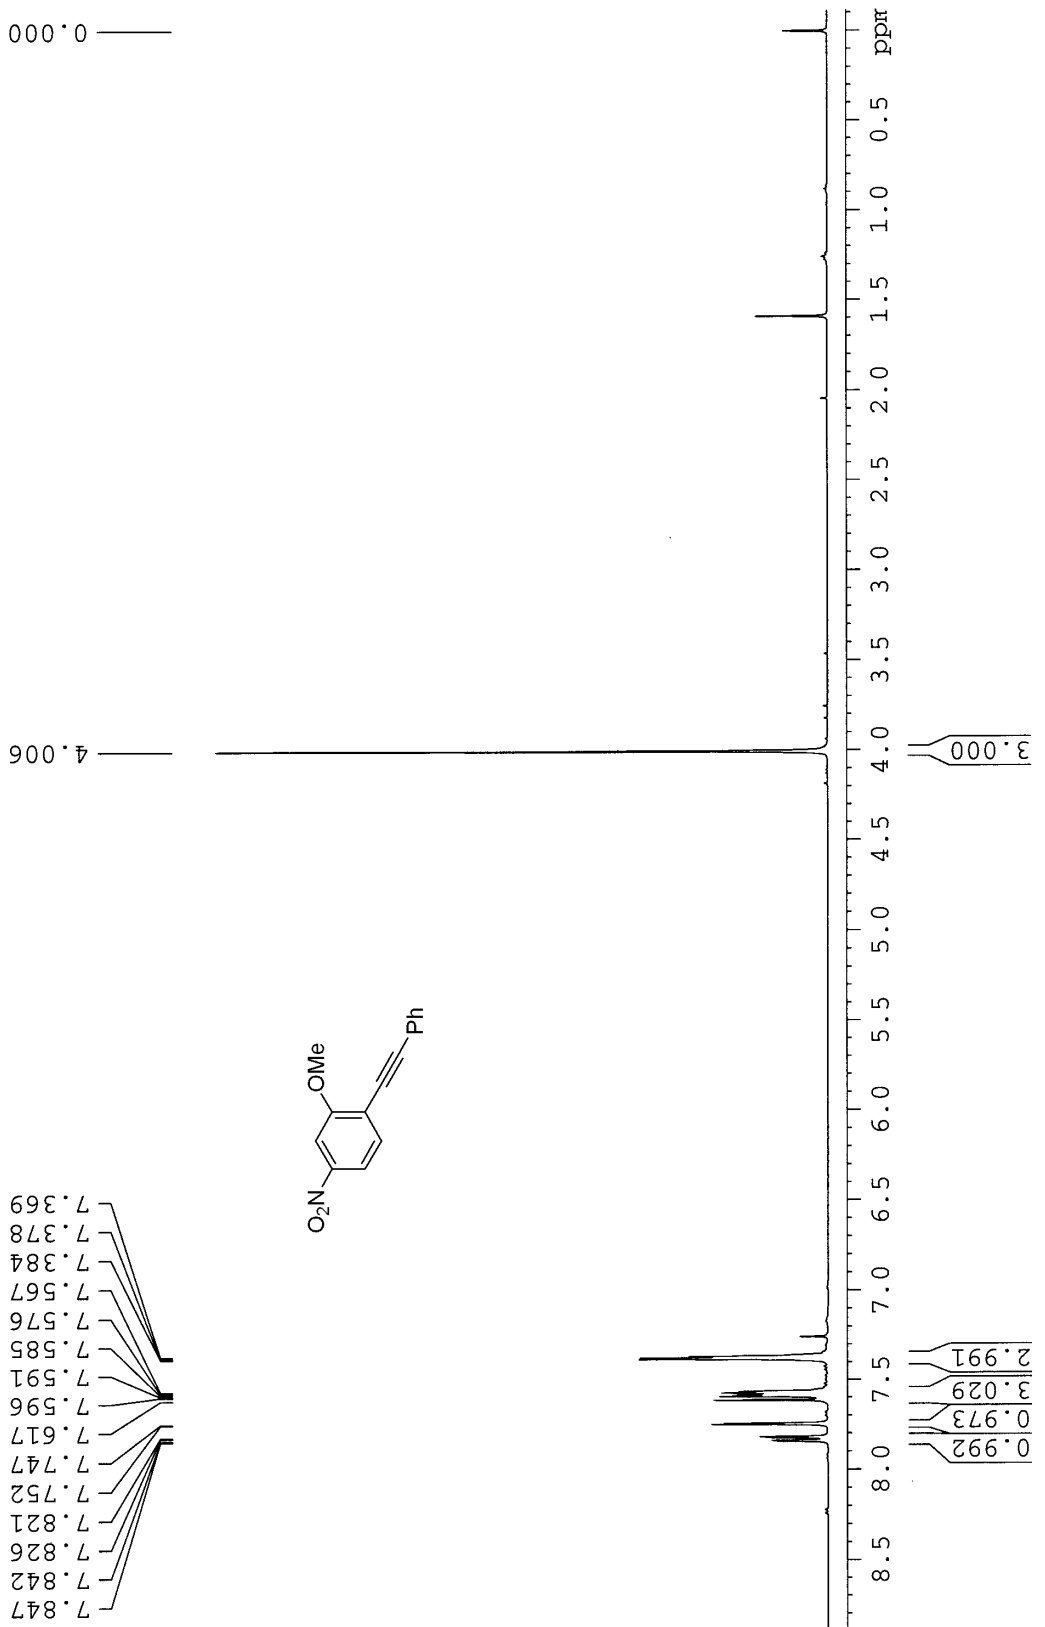

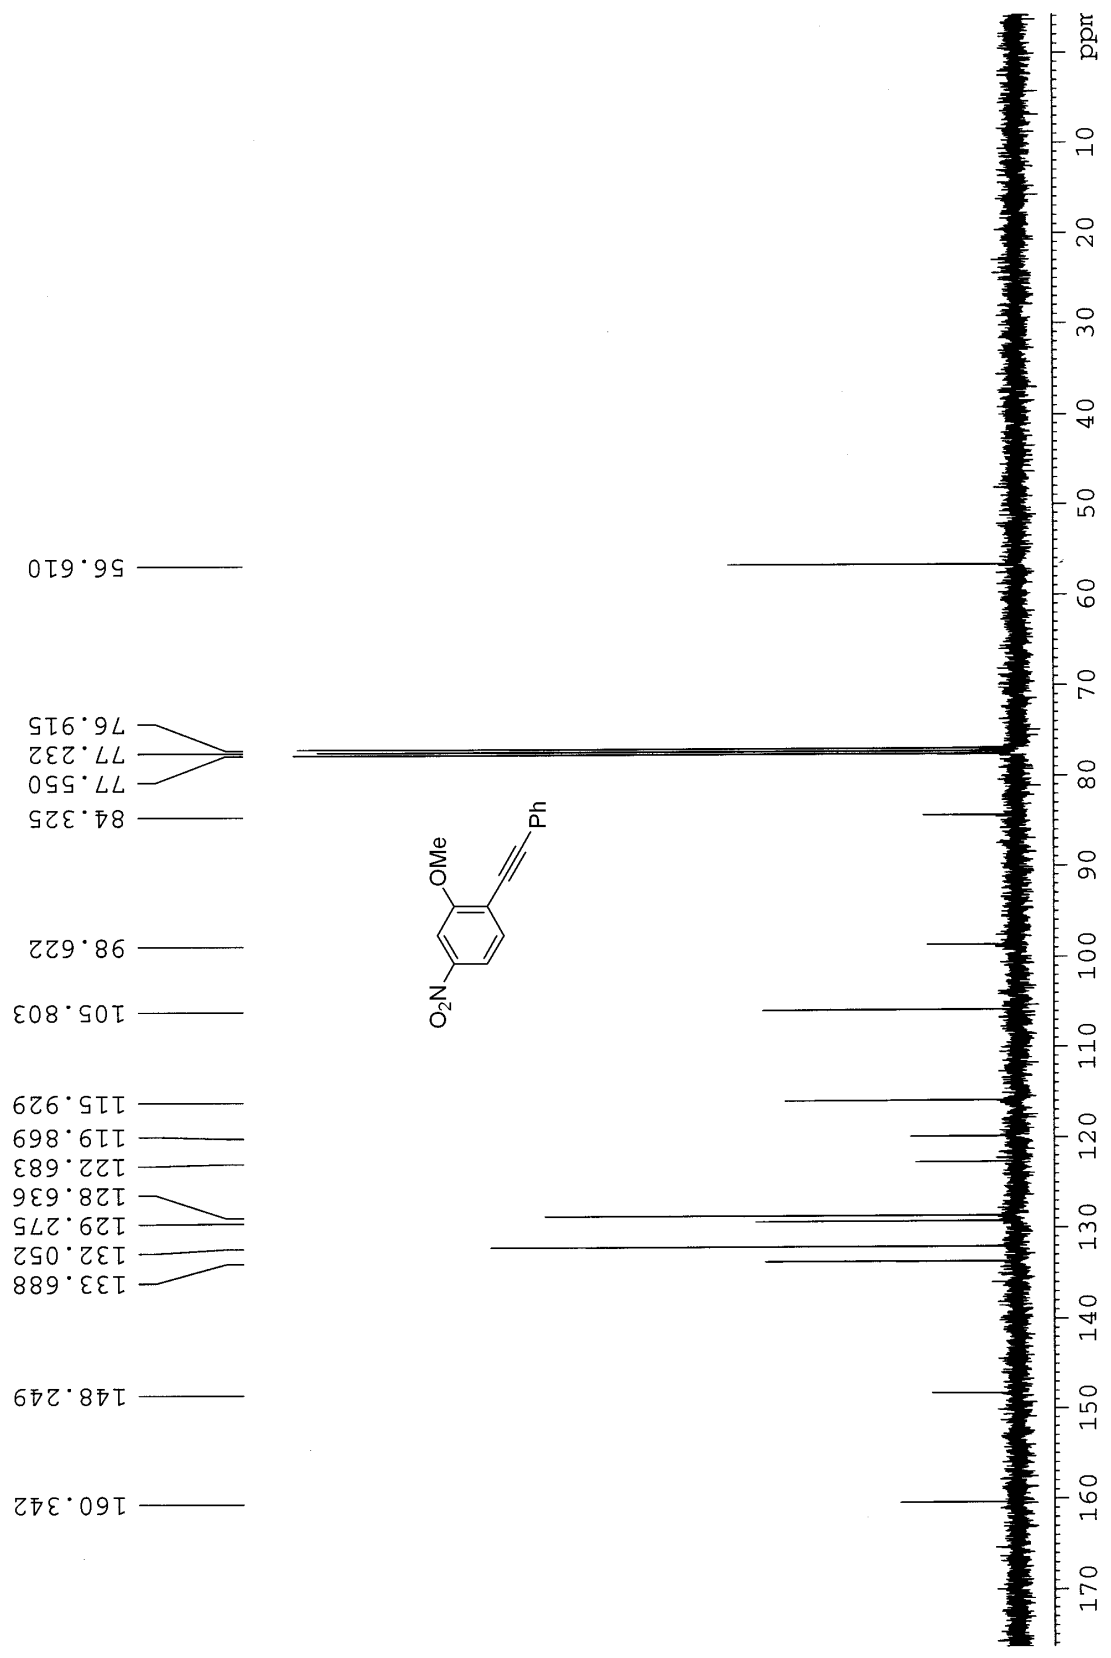

0.000

7.502  
7.505  
7.520  
7.529  
7.539  
7.543  
7.553  
7.560  
8.181  
8.185  
8.196  
8.201  
8.205  
8.218  
8.223  
8.239  
8.244  
8.383  
8.388

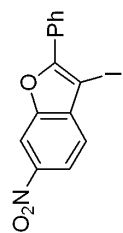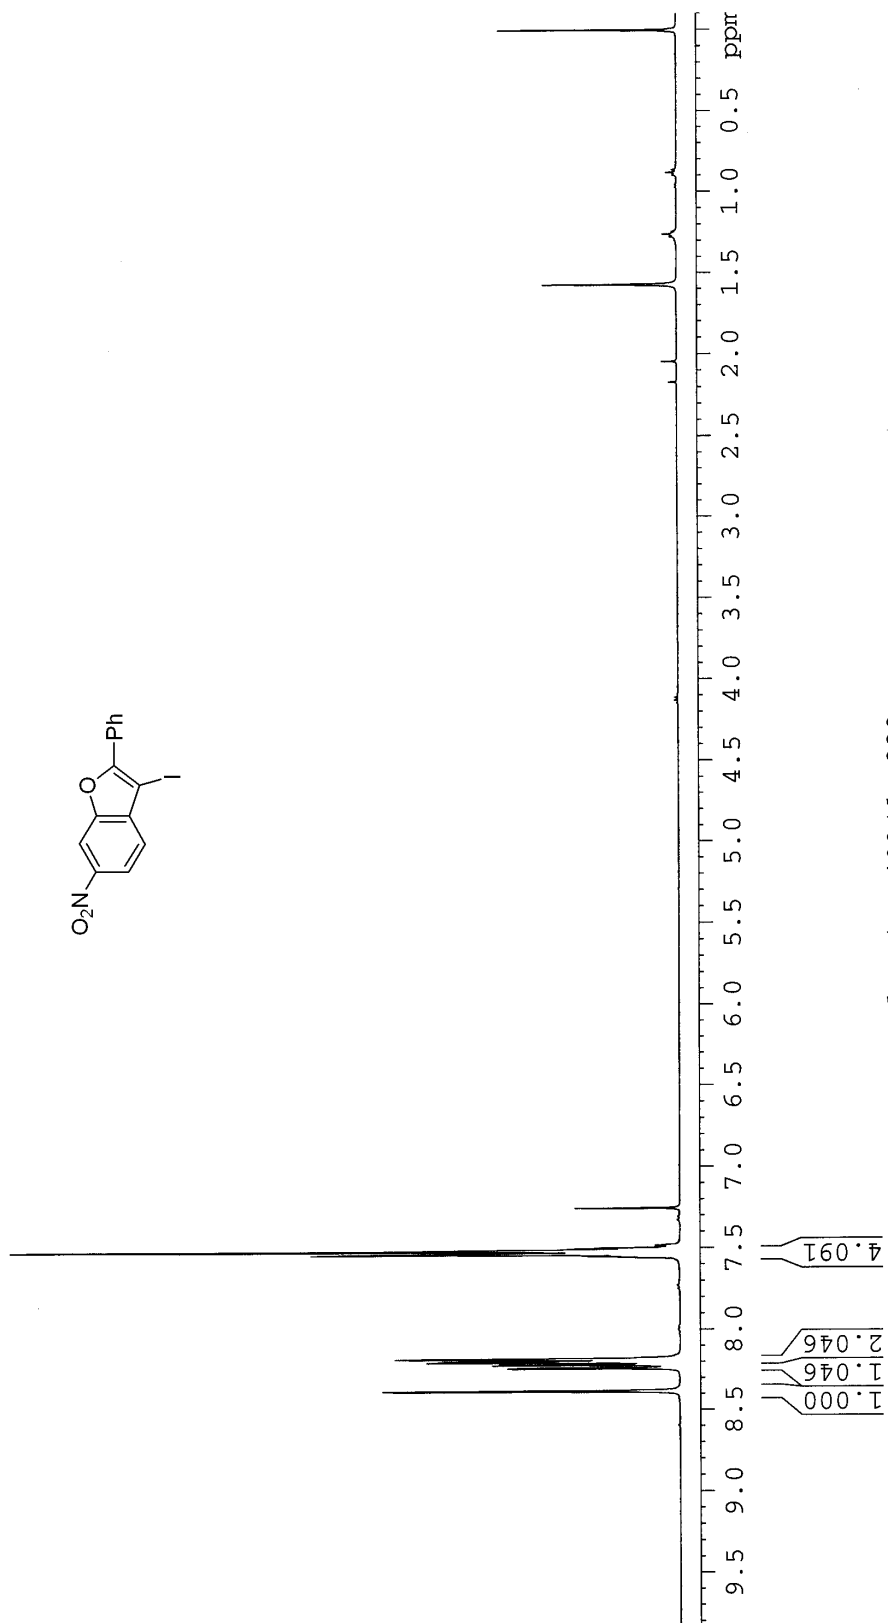

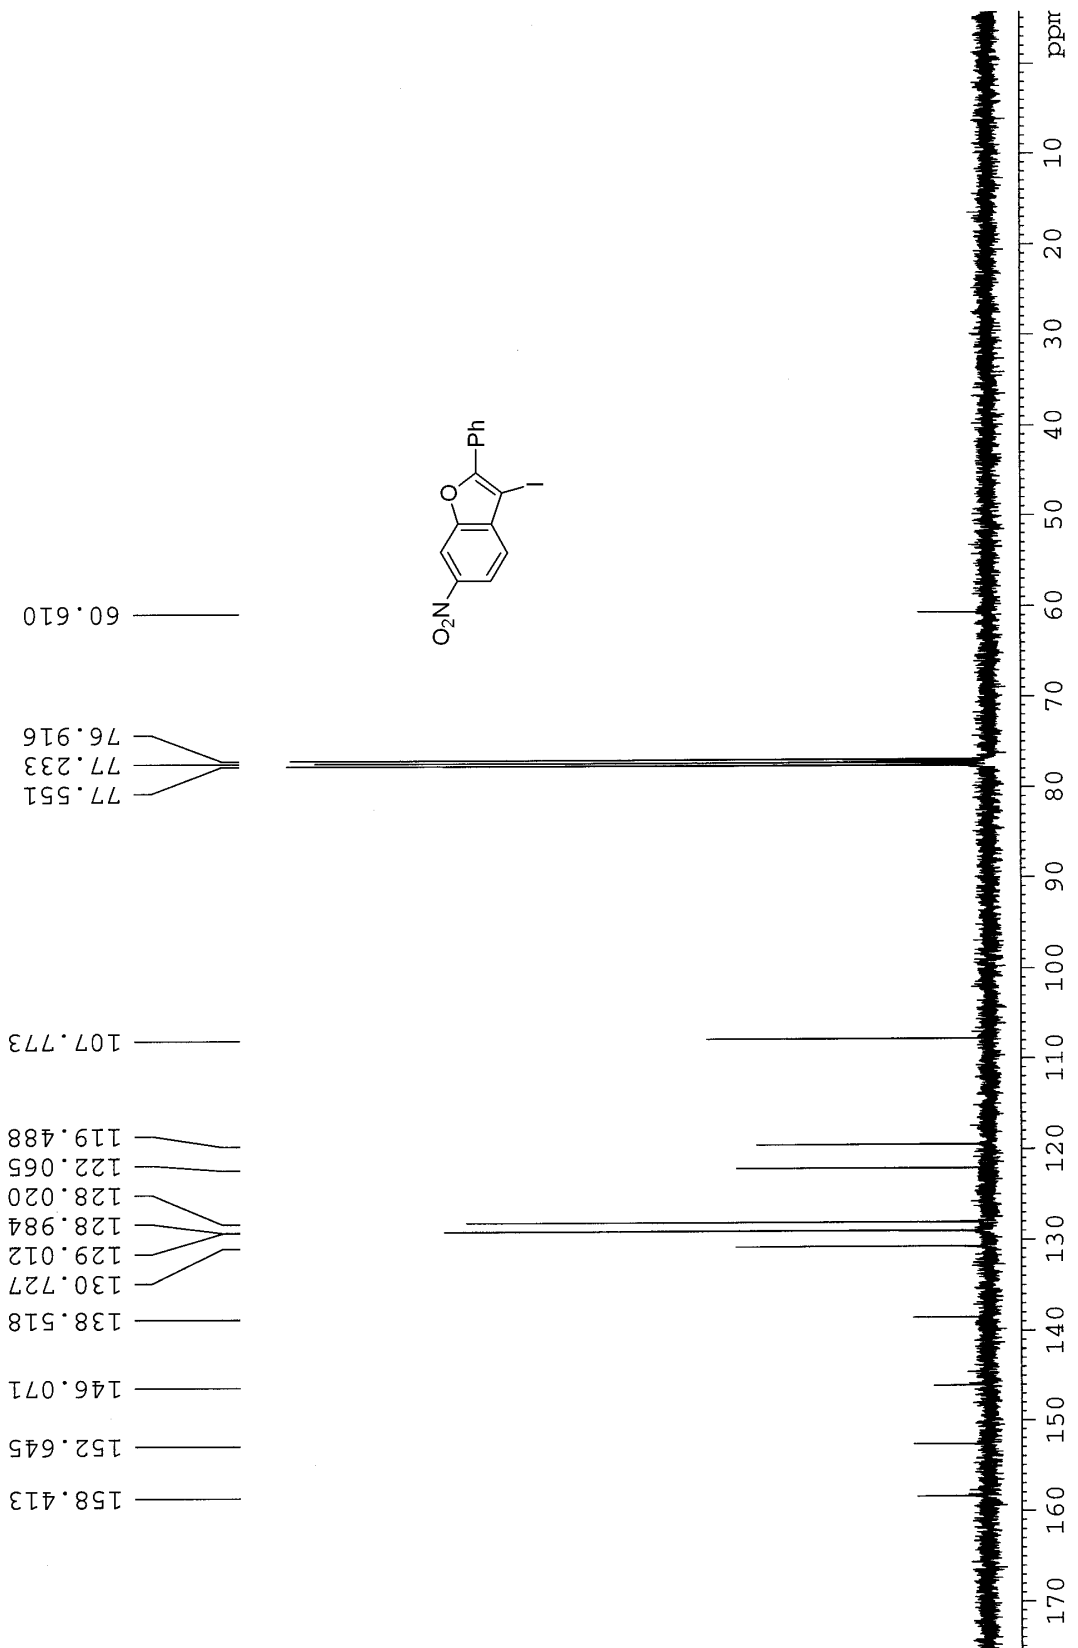



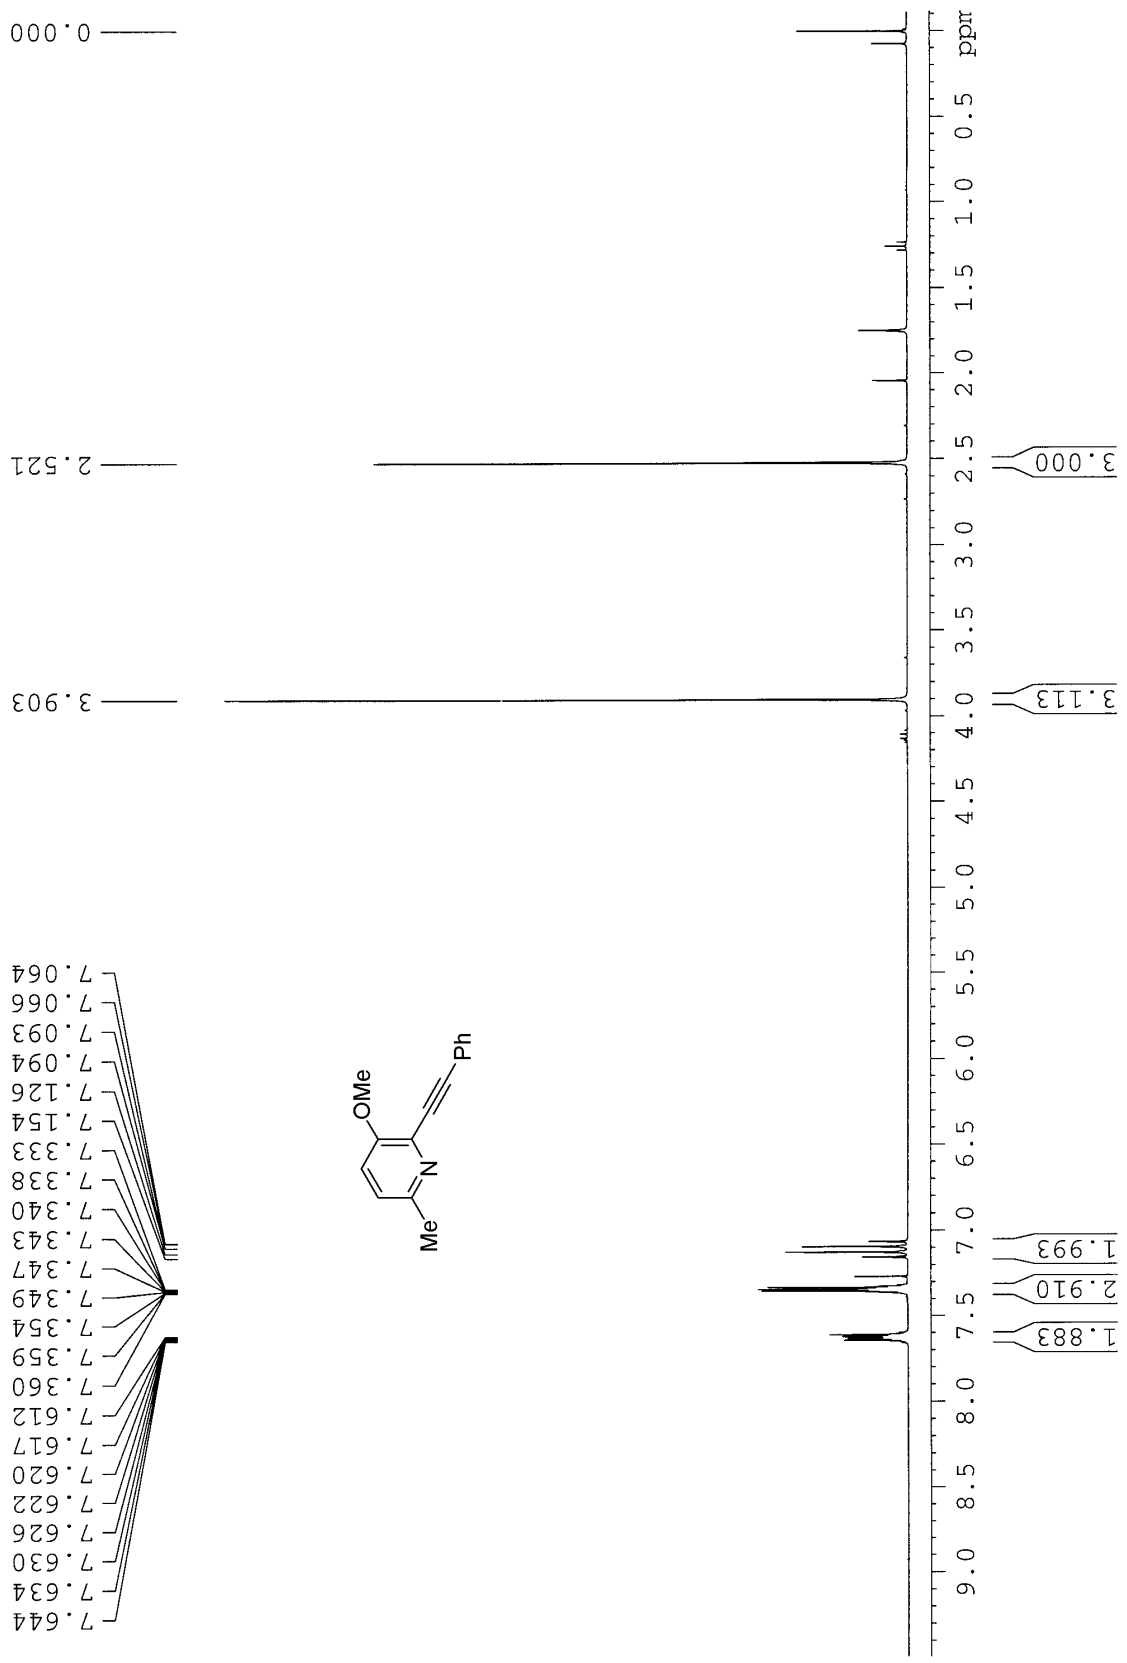

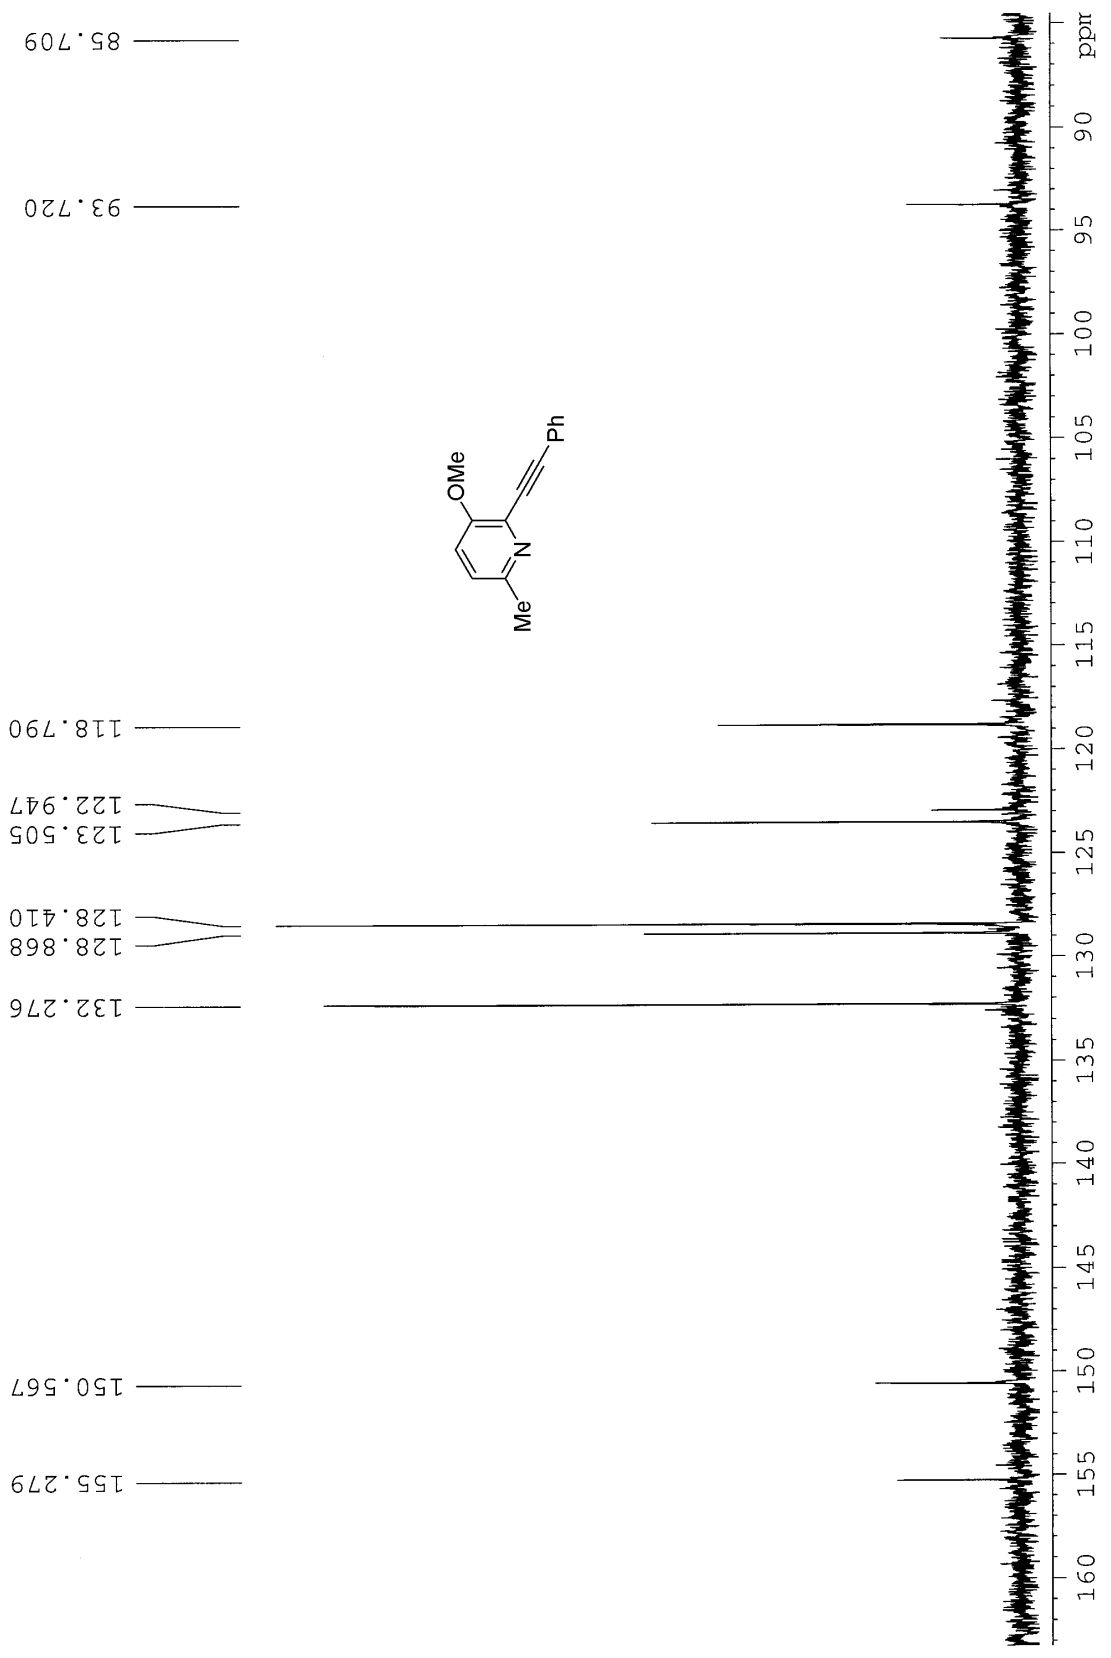

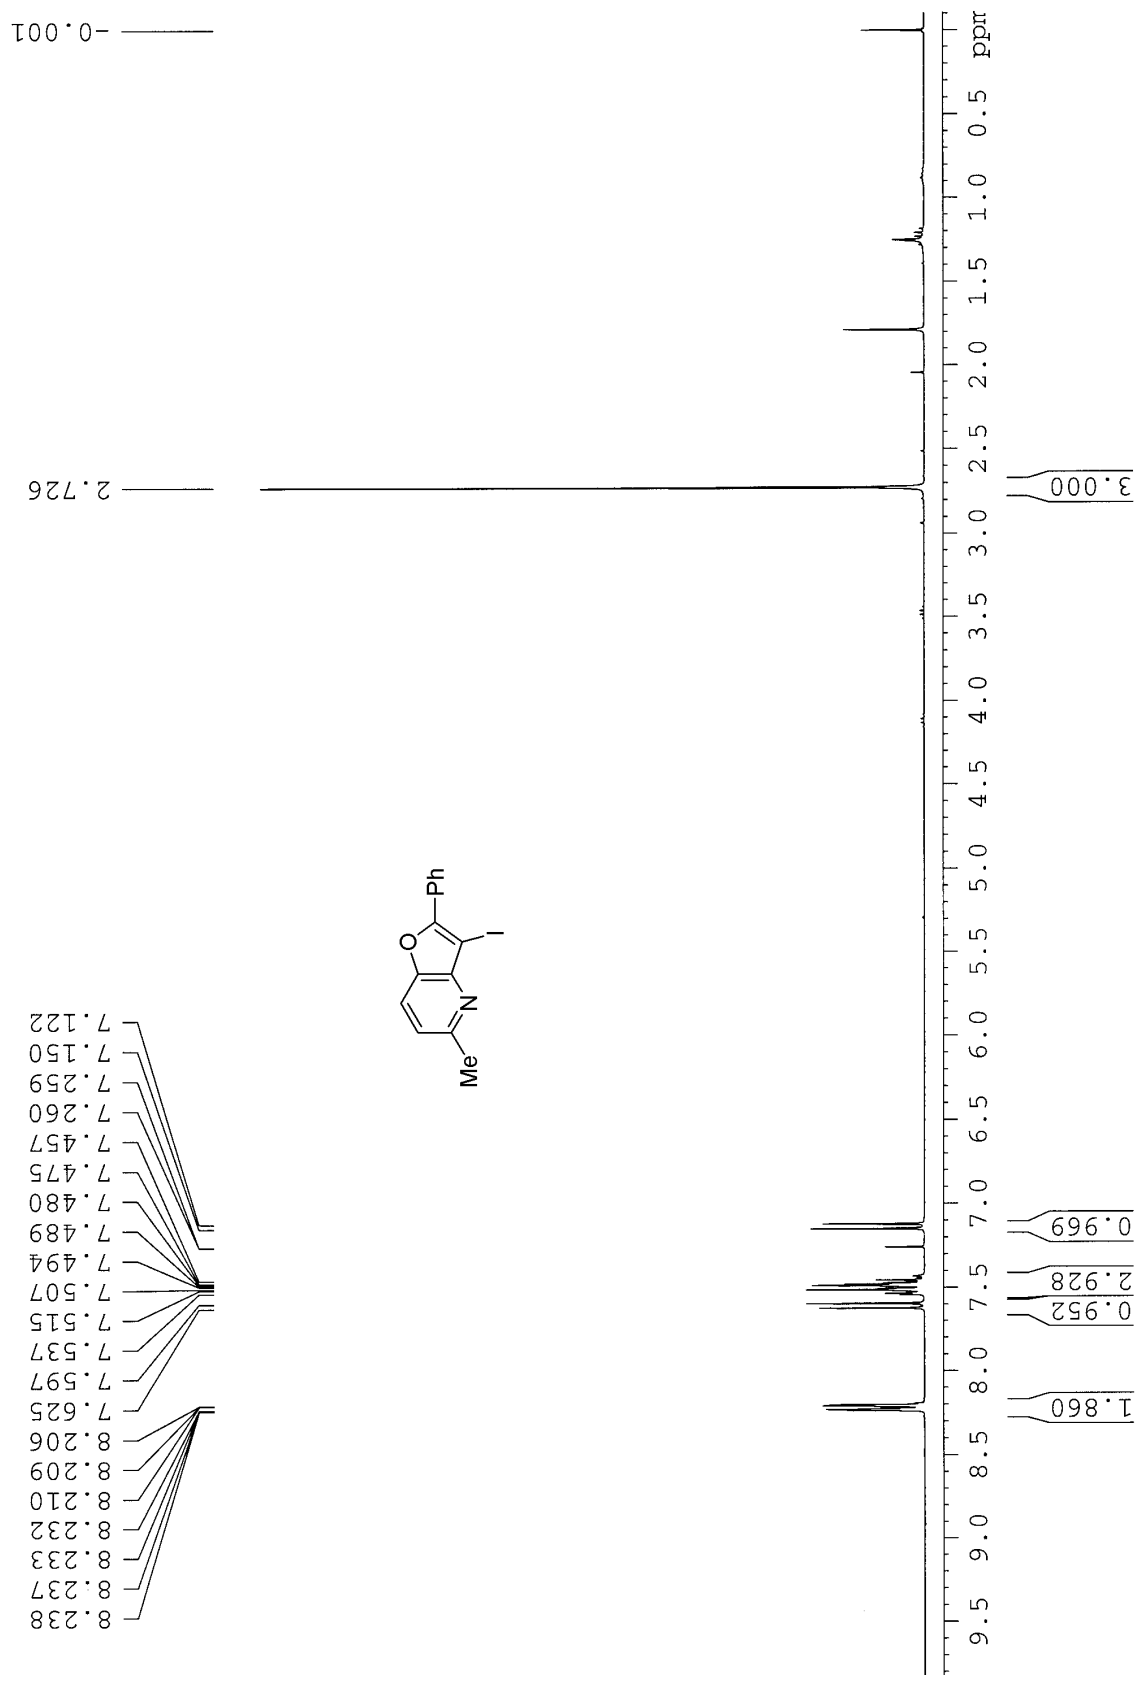

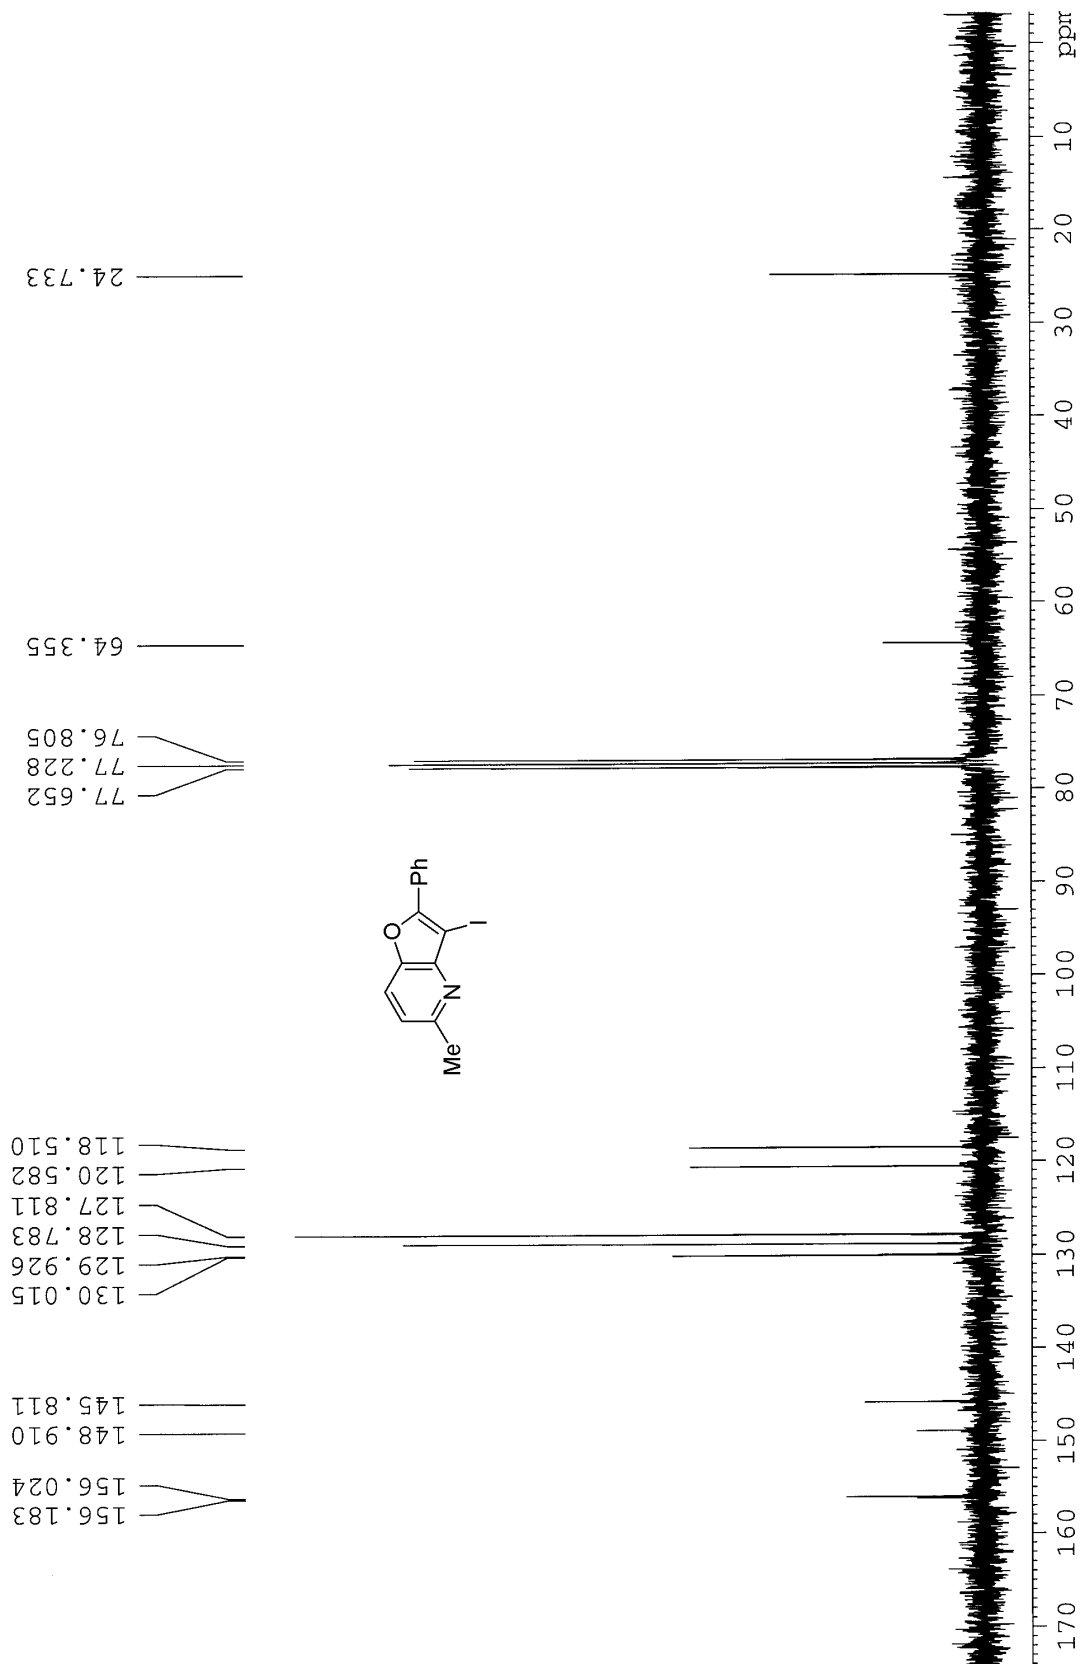

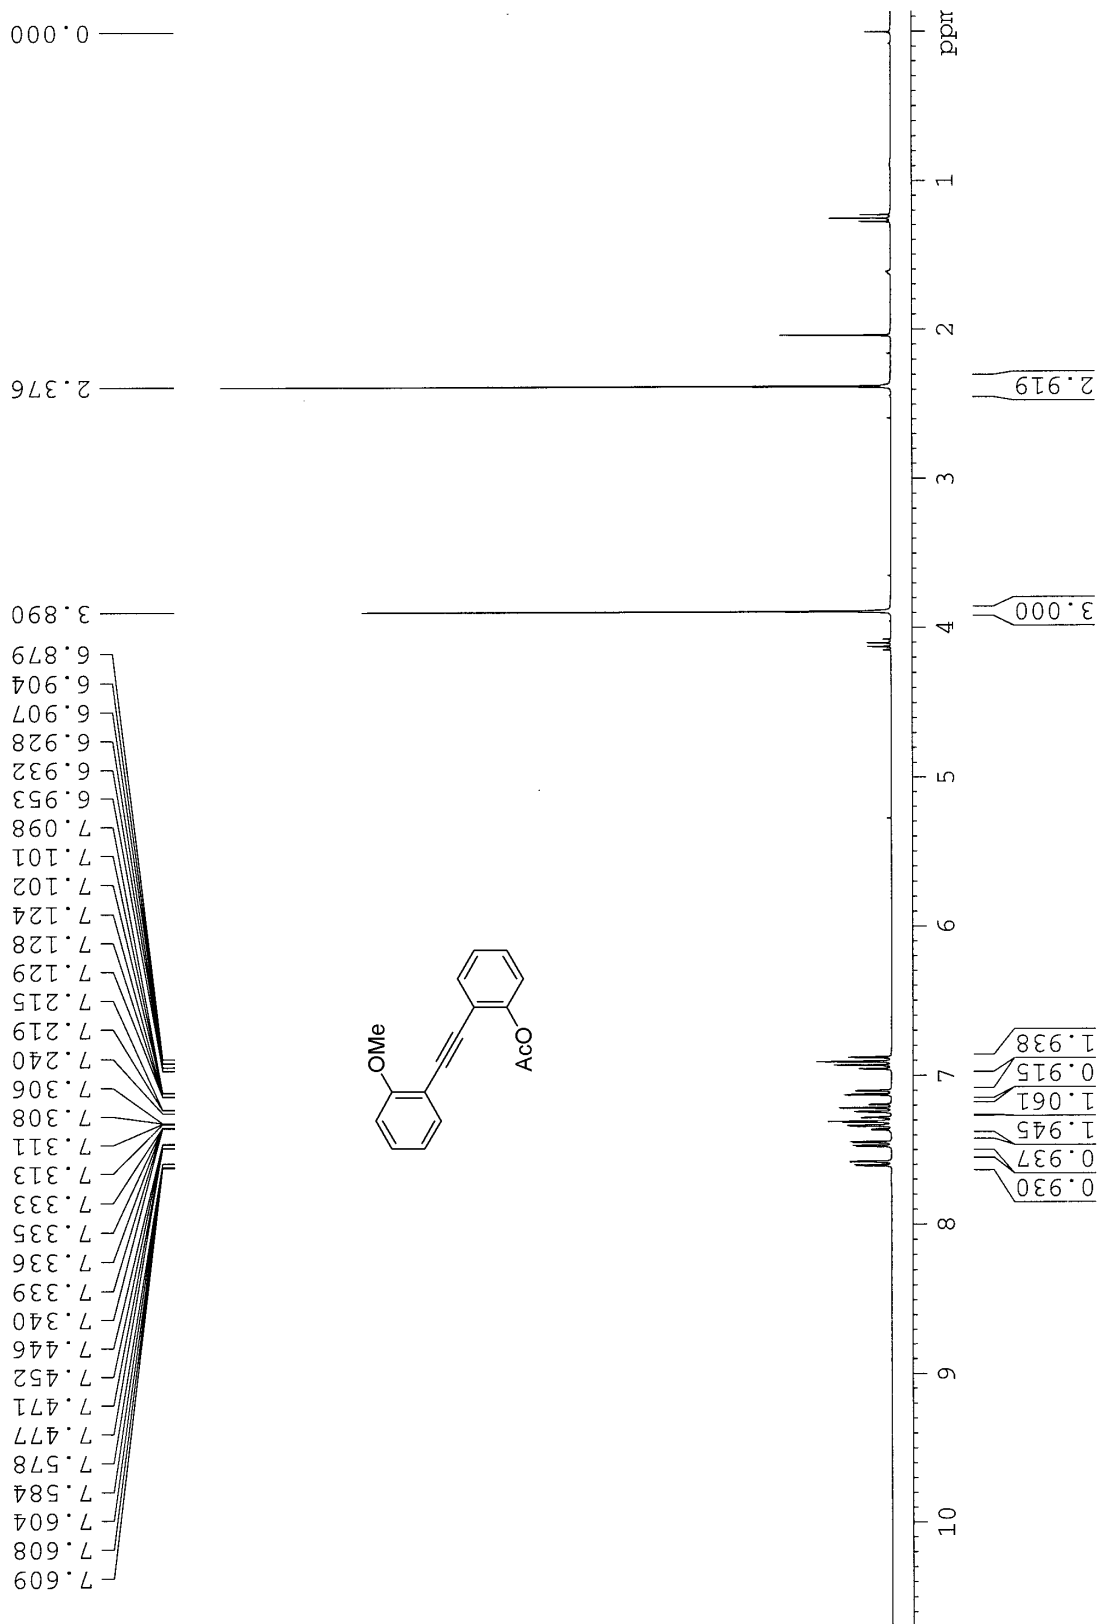

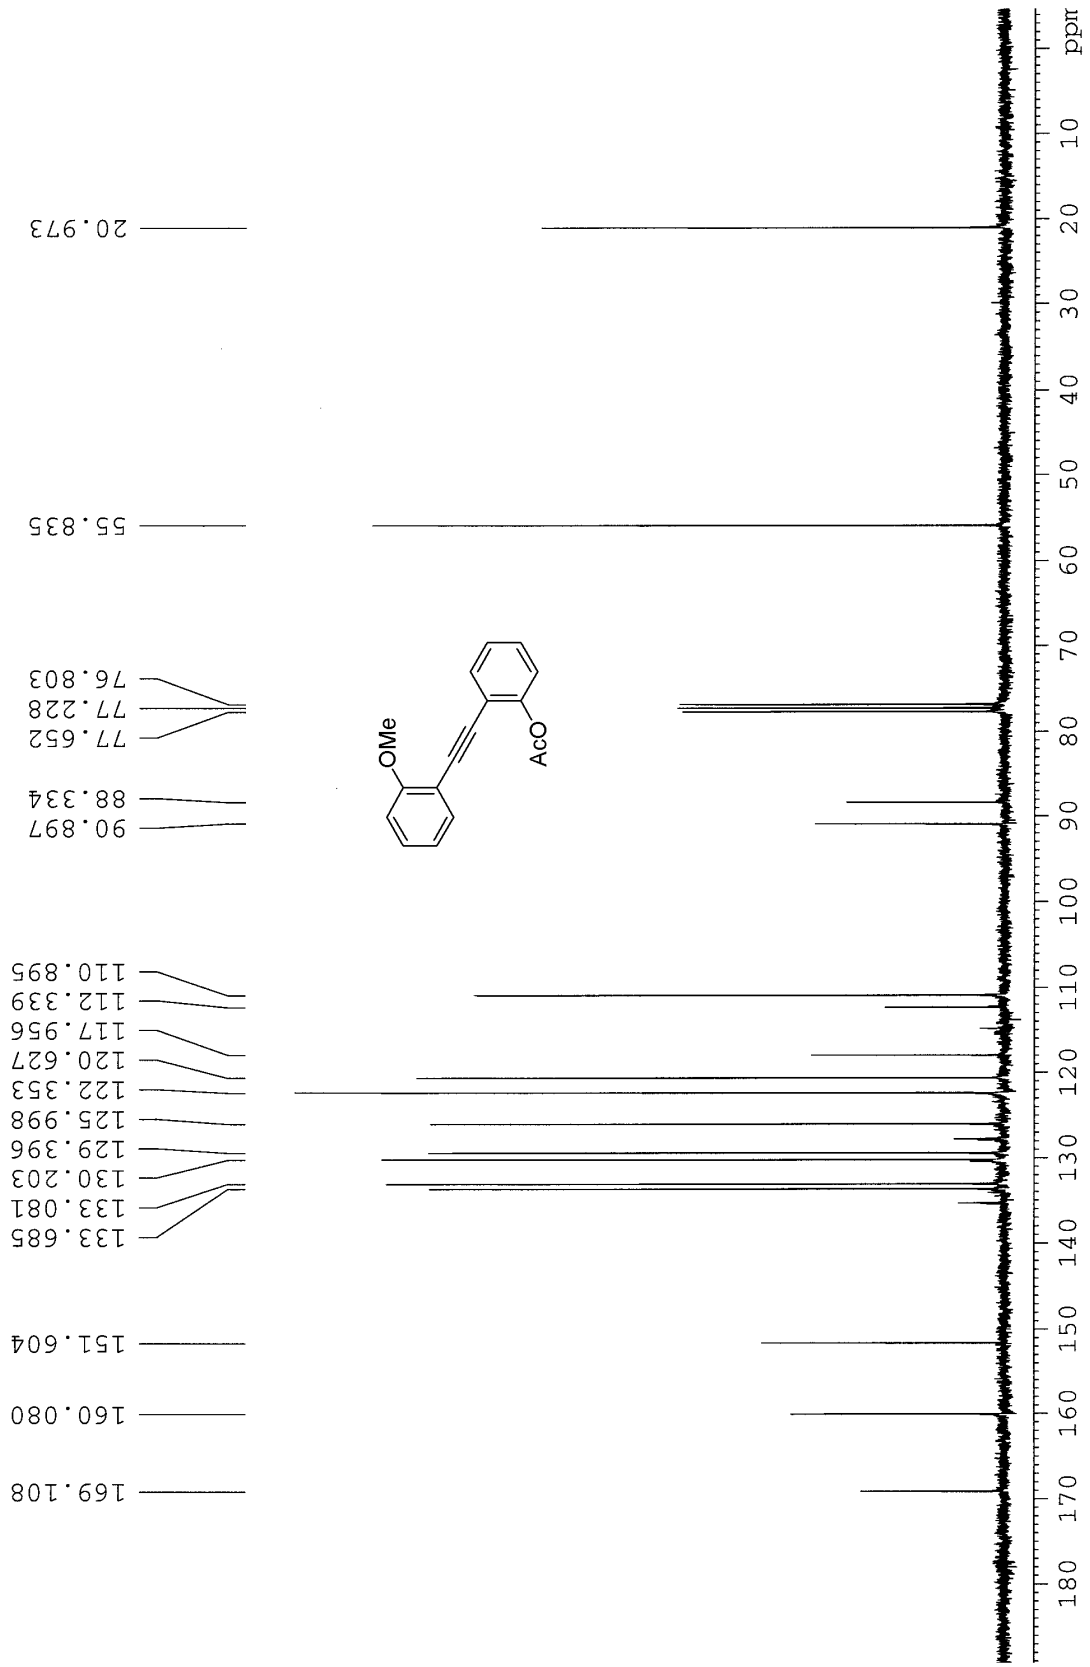

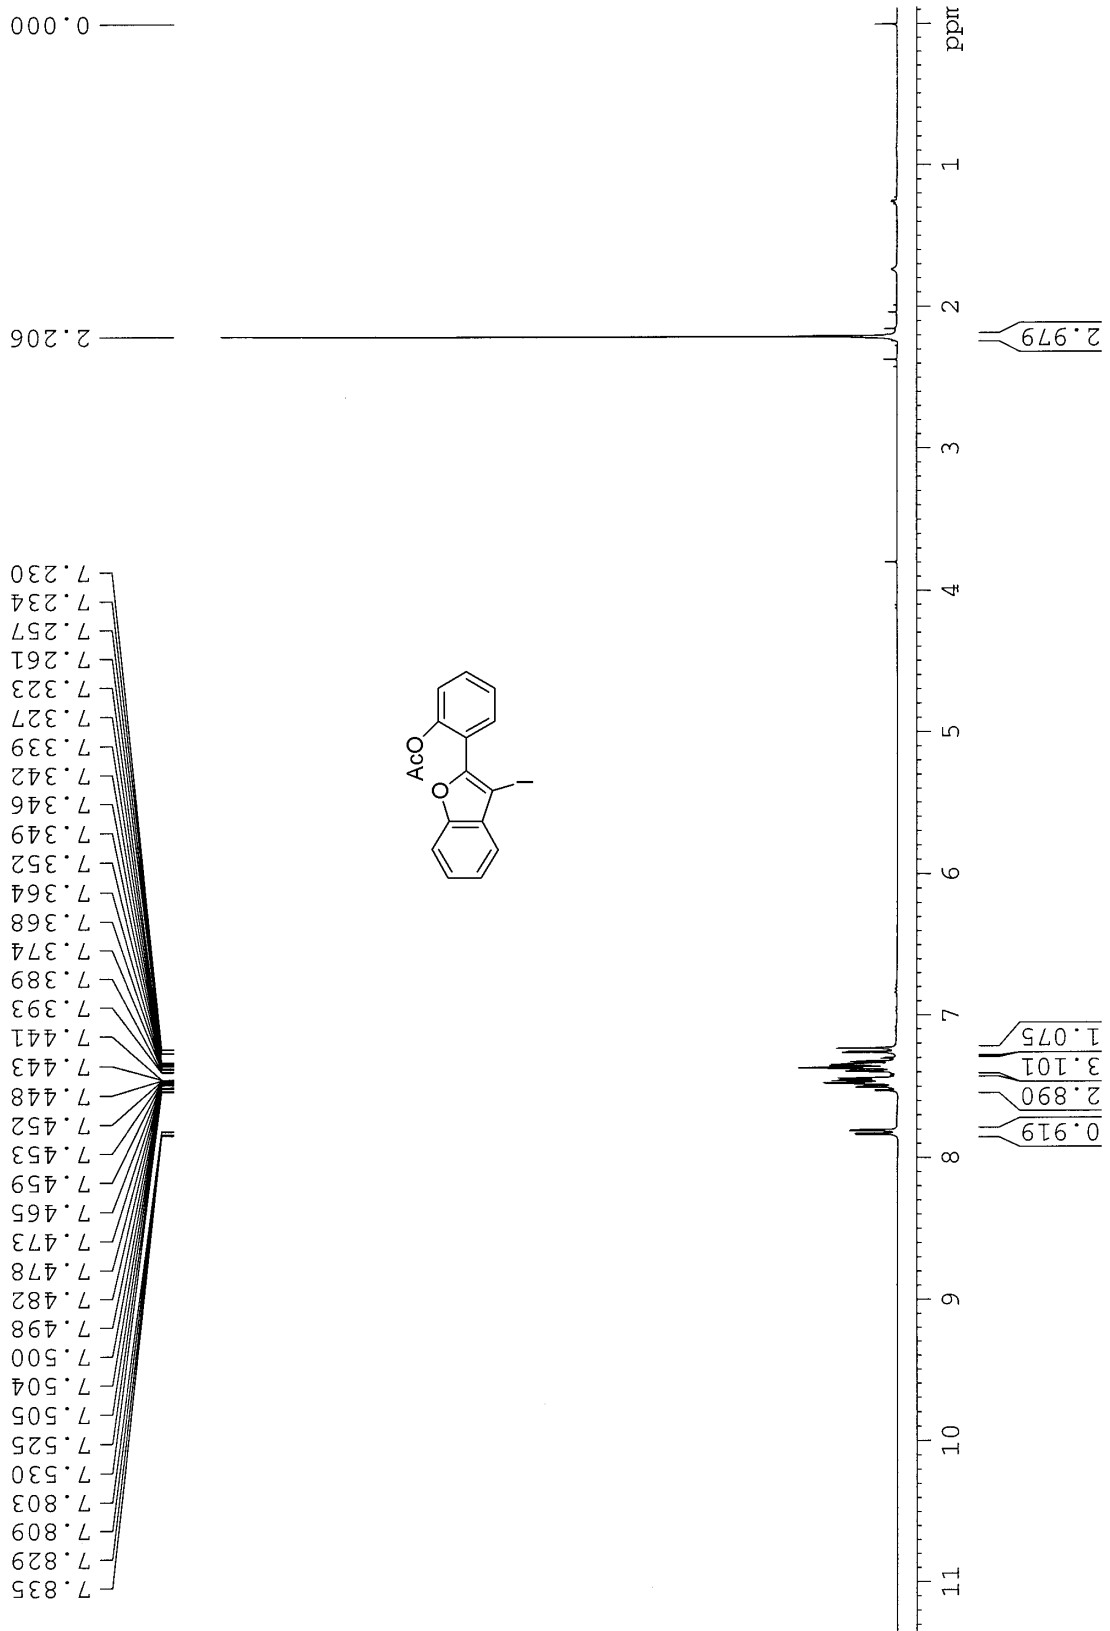

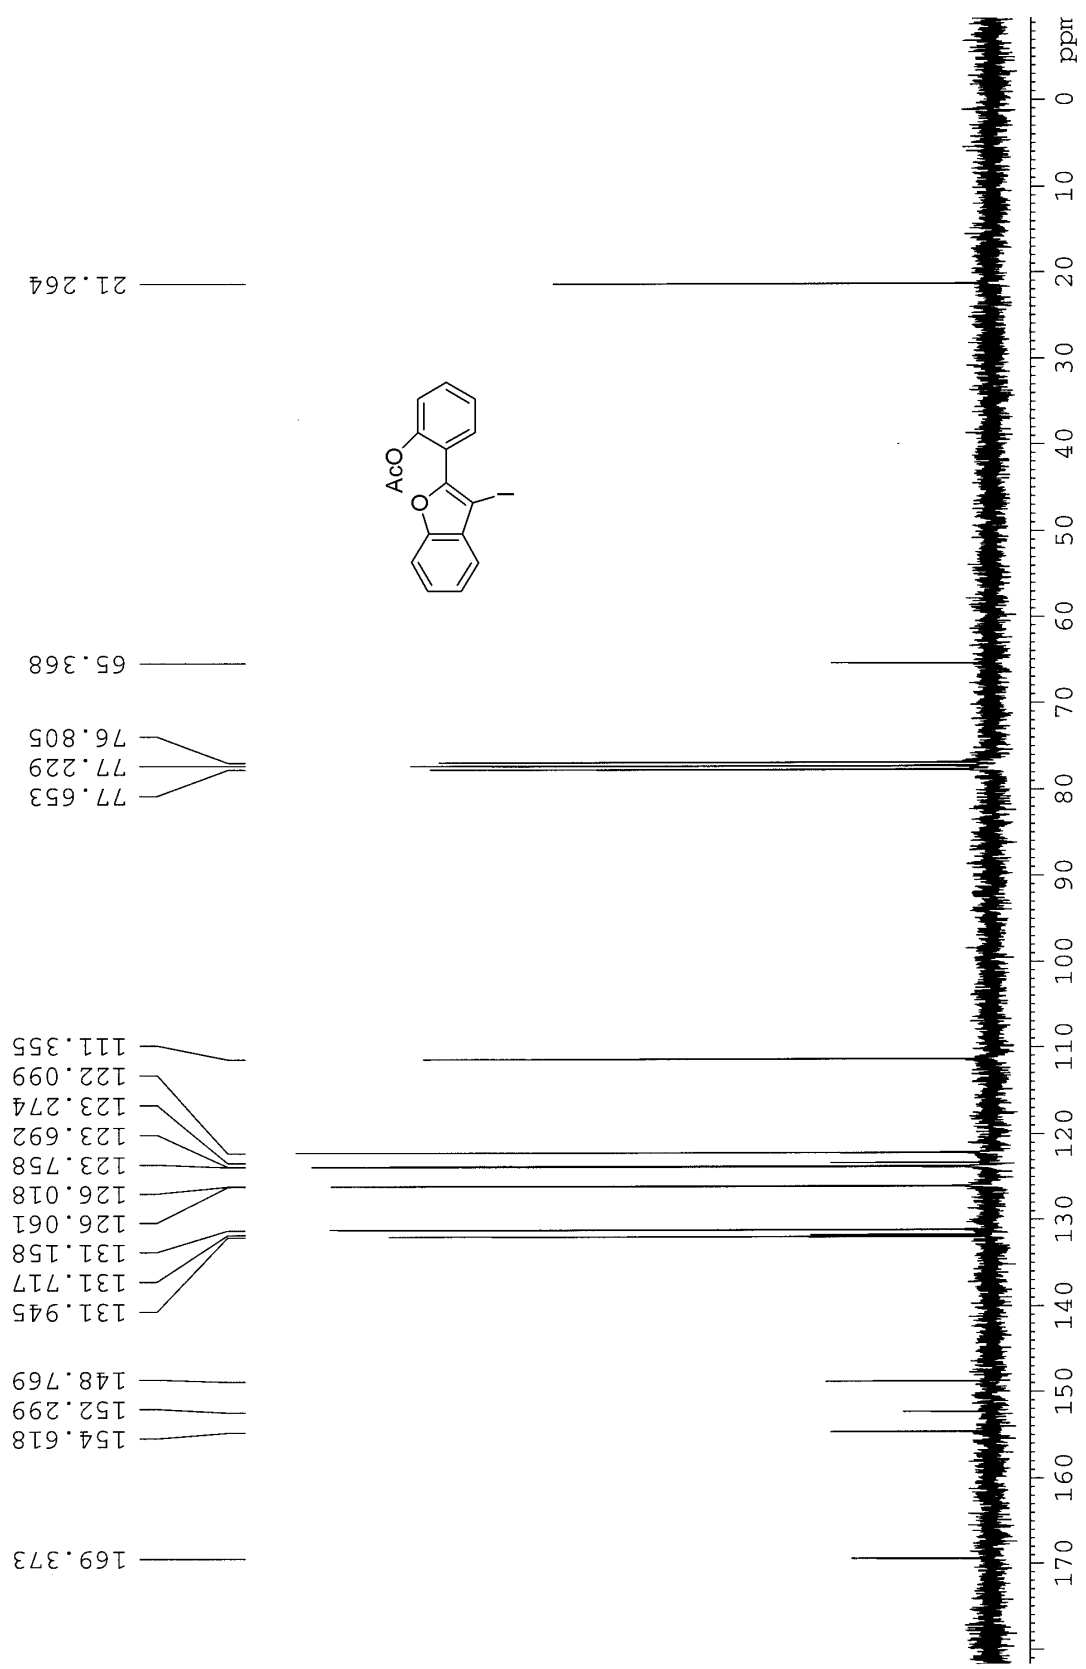



0.000

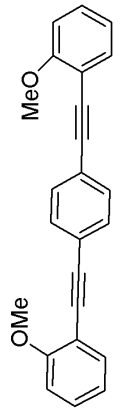

3.905

6.000

6.884  
6.904  
6.918  
6.937  
6.955  
7.283  
7.286  
7.304  
7.323  
7.484  
7.486  
7.503  
7.505  
7.525

4.037  
2.061  
5.924

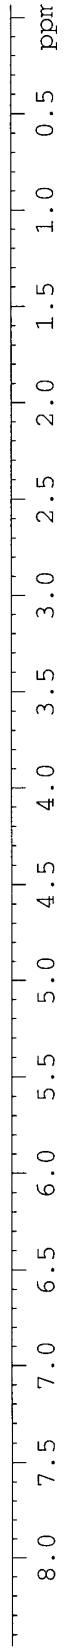

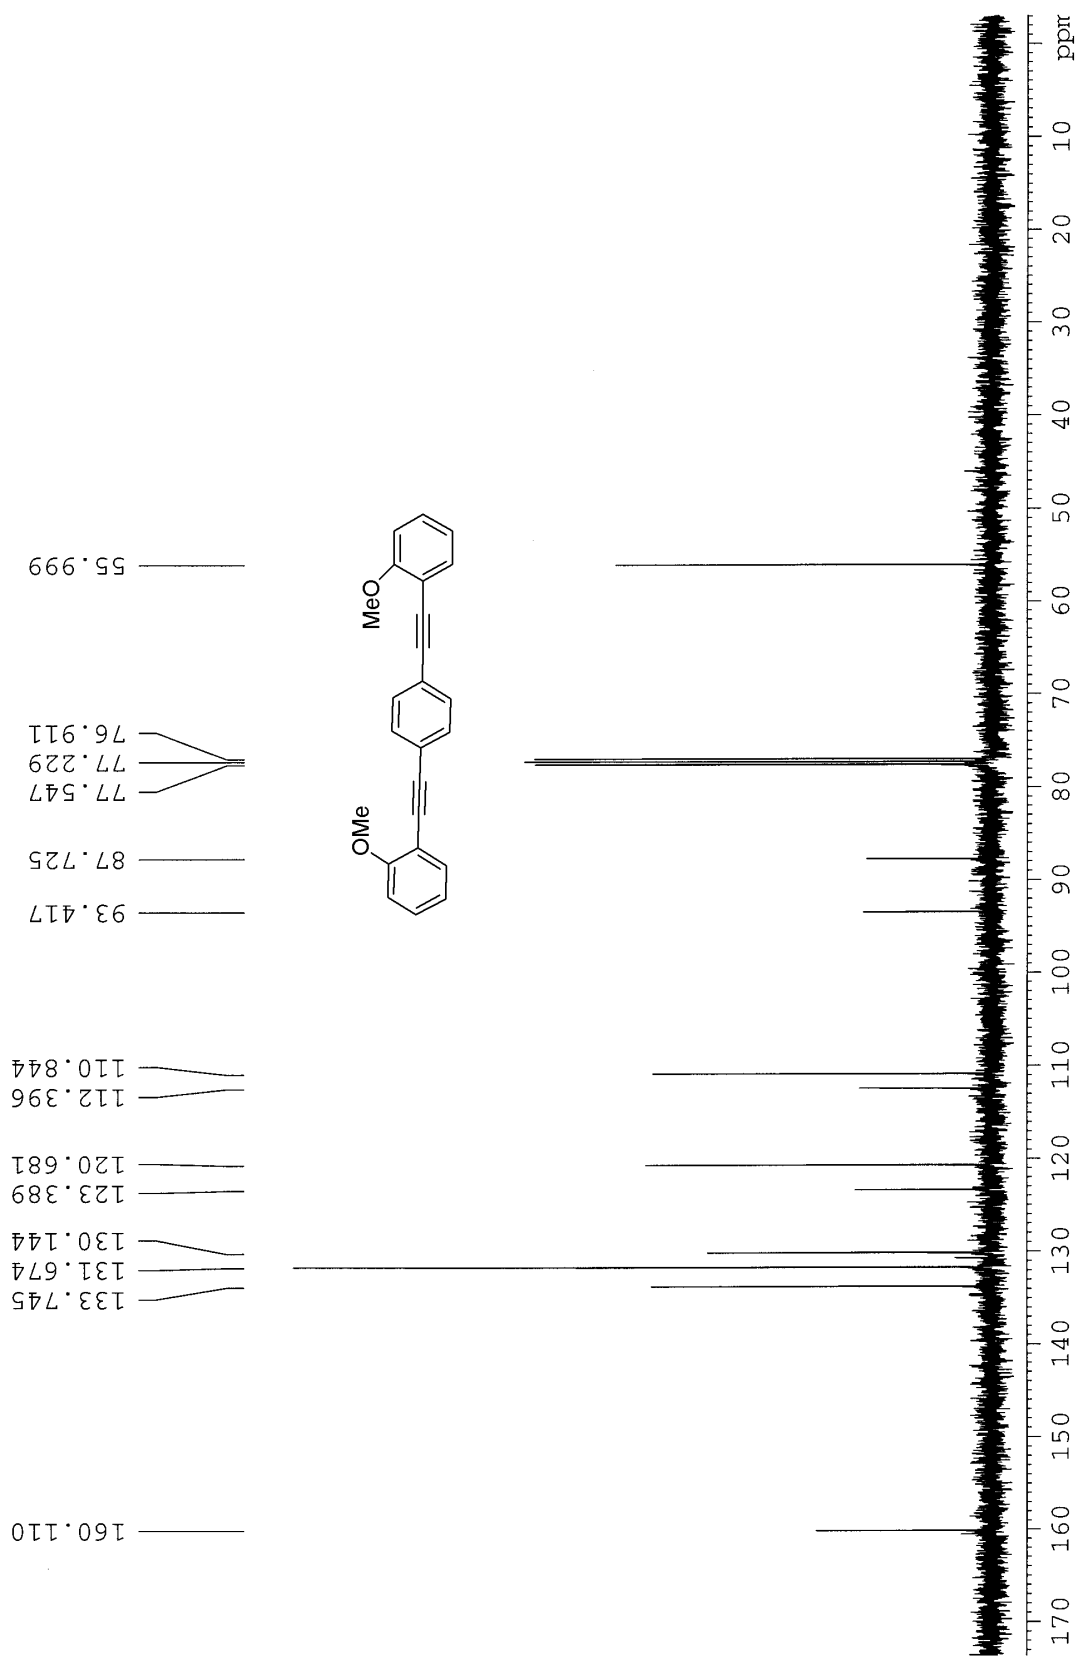

0.000

8.356  
7.529  
7.509  
7.495  
7.494  
7.477  
7.474  
7.417  
7.413  
7.399  
7.395  
7.379  
7.375  
7.362  
7.359  
7.343  
7.341

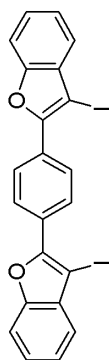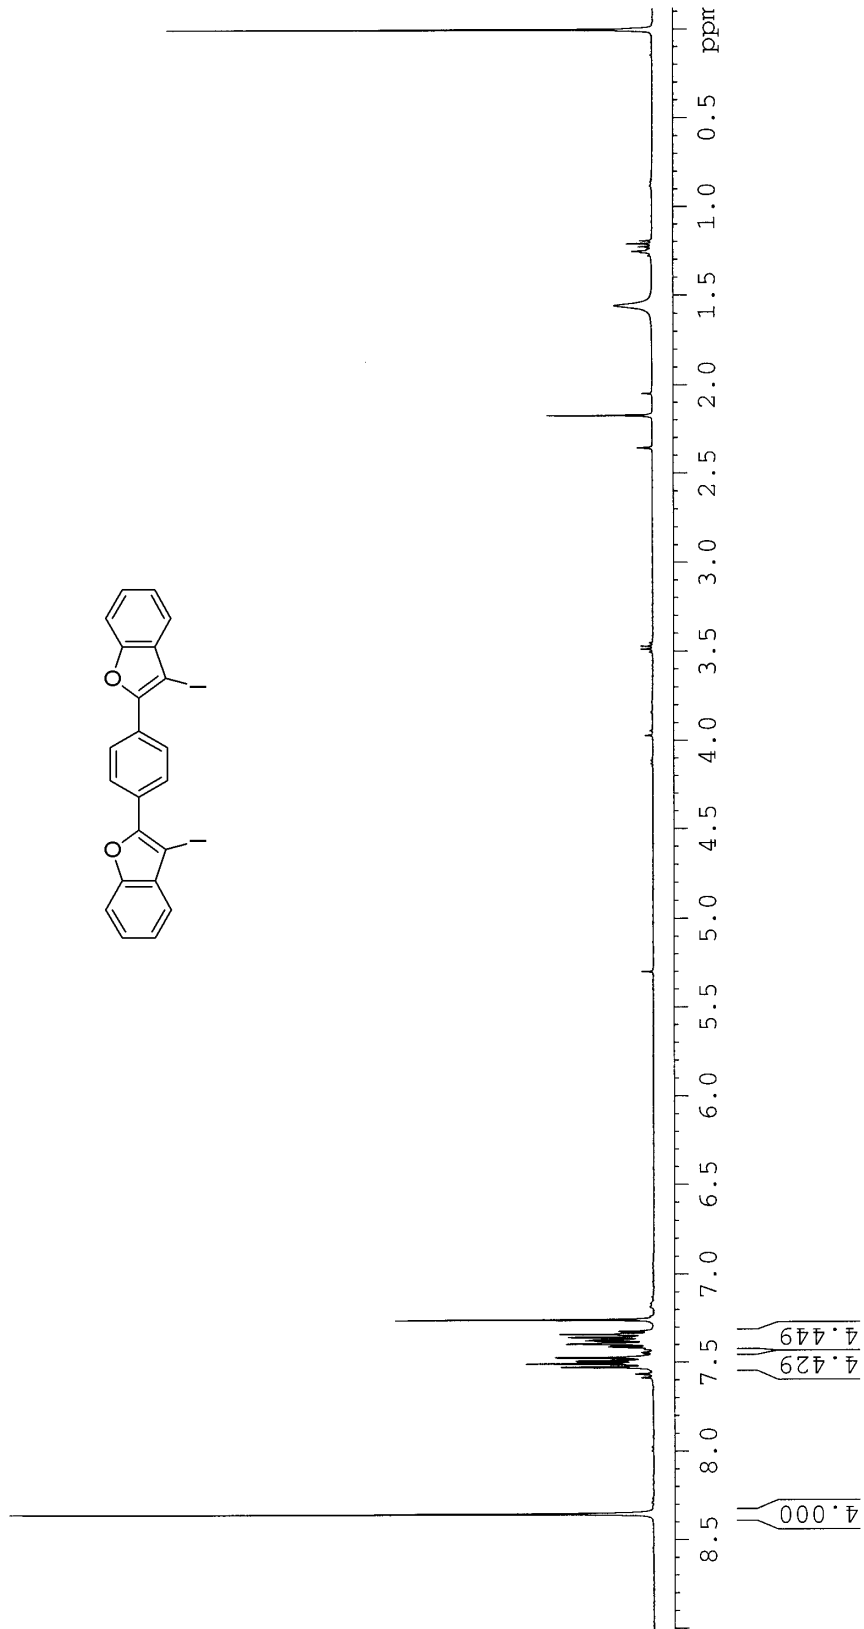

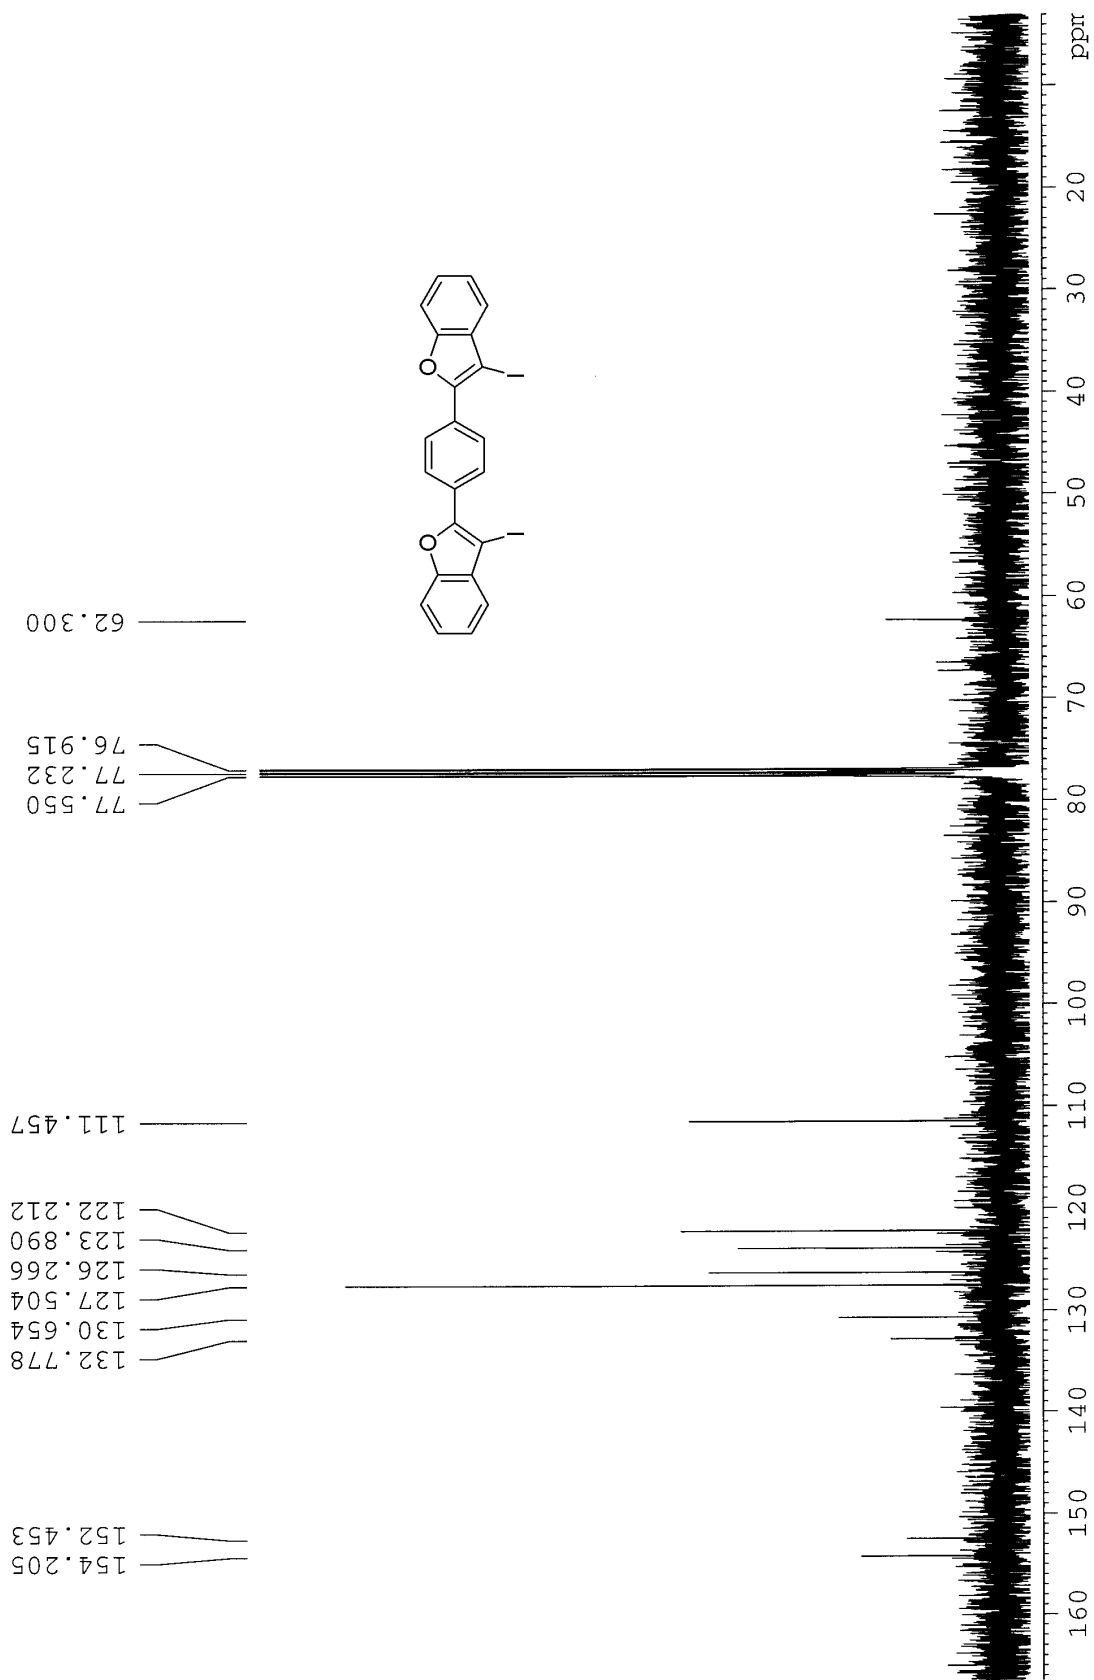

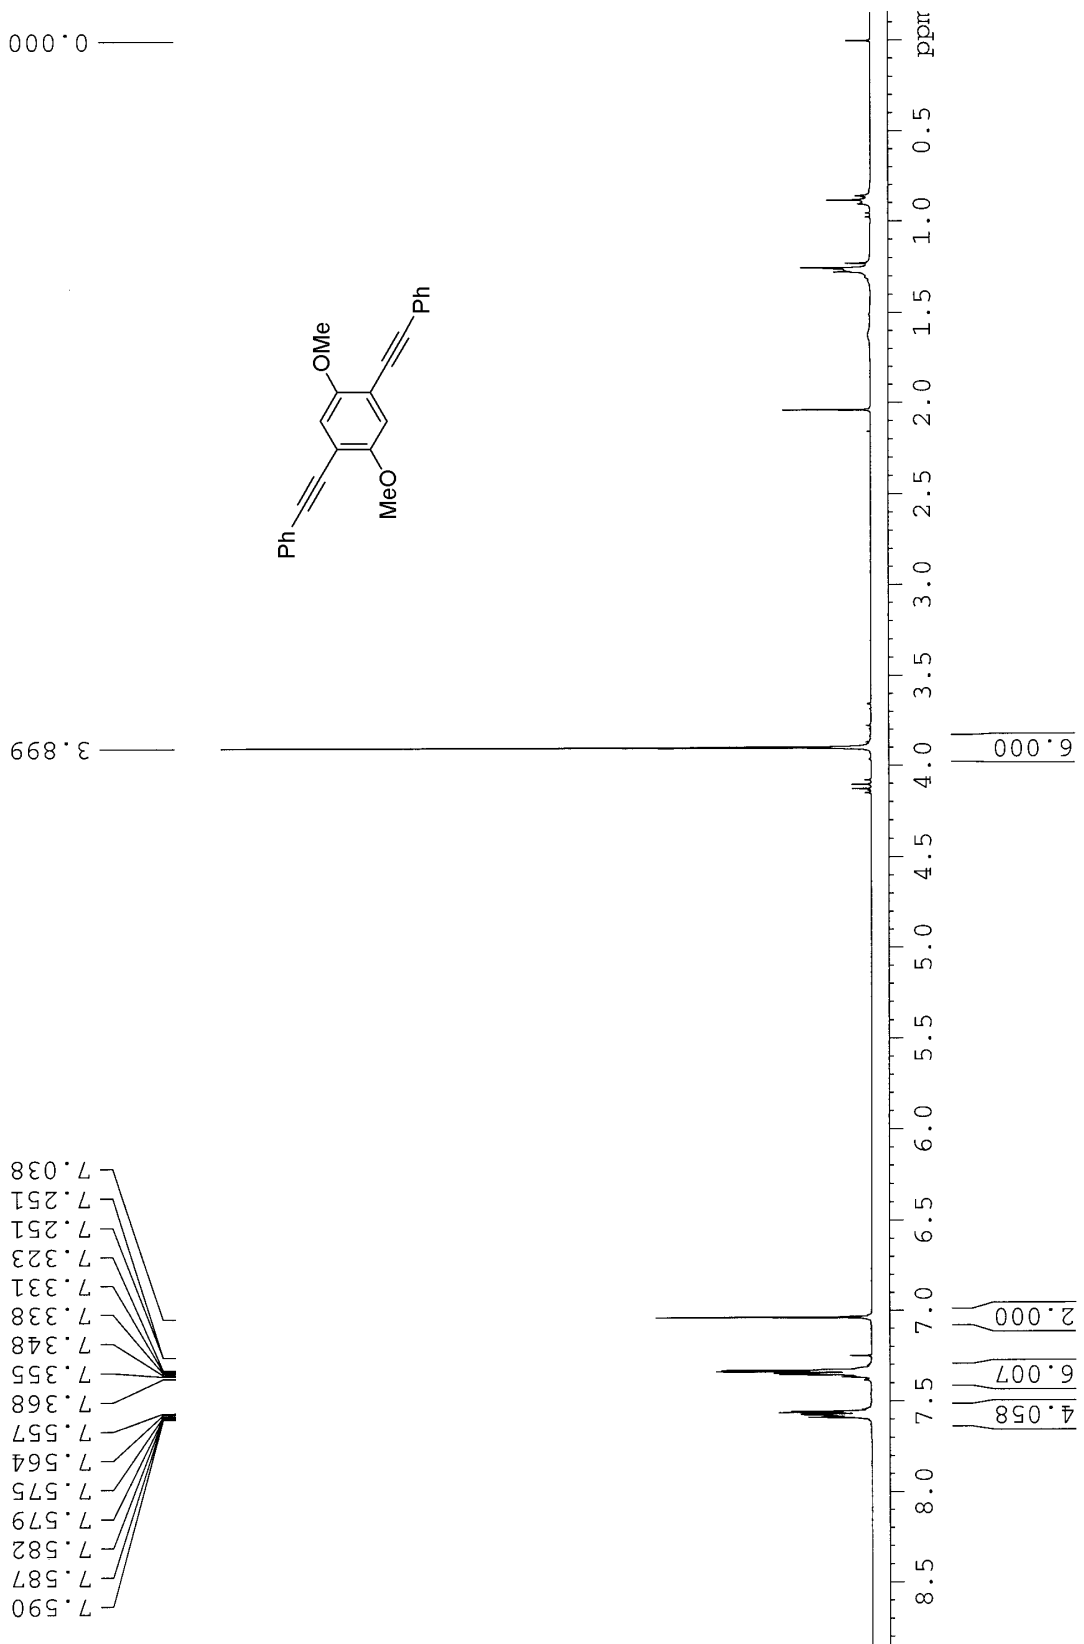

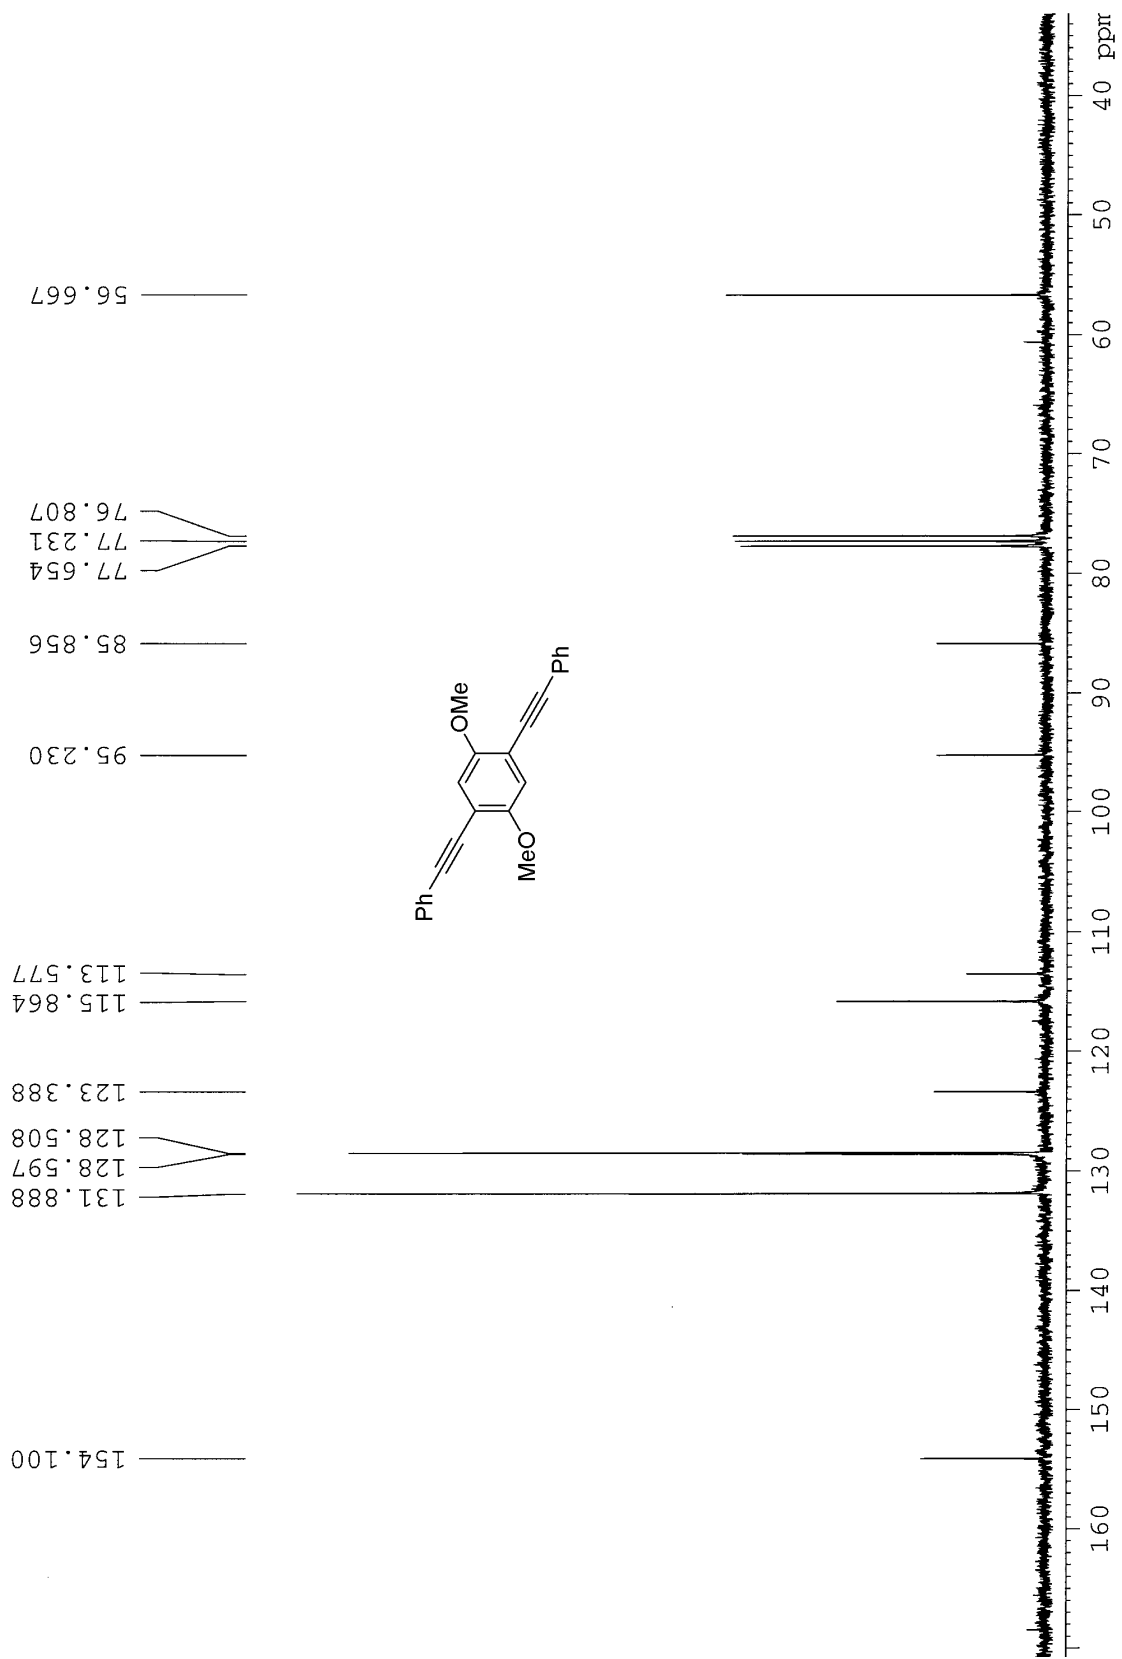

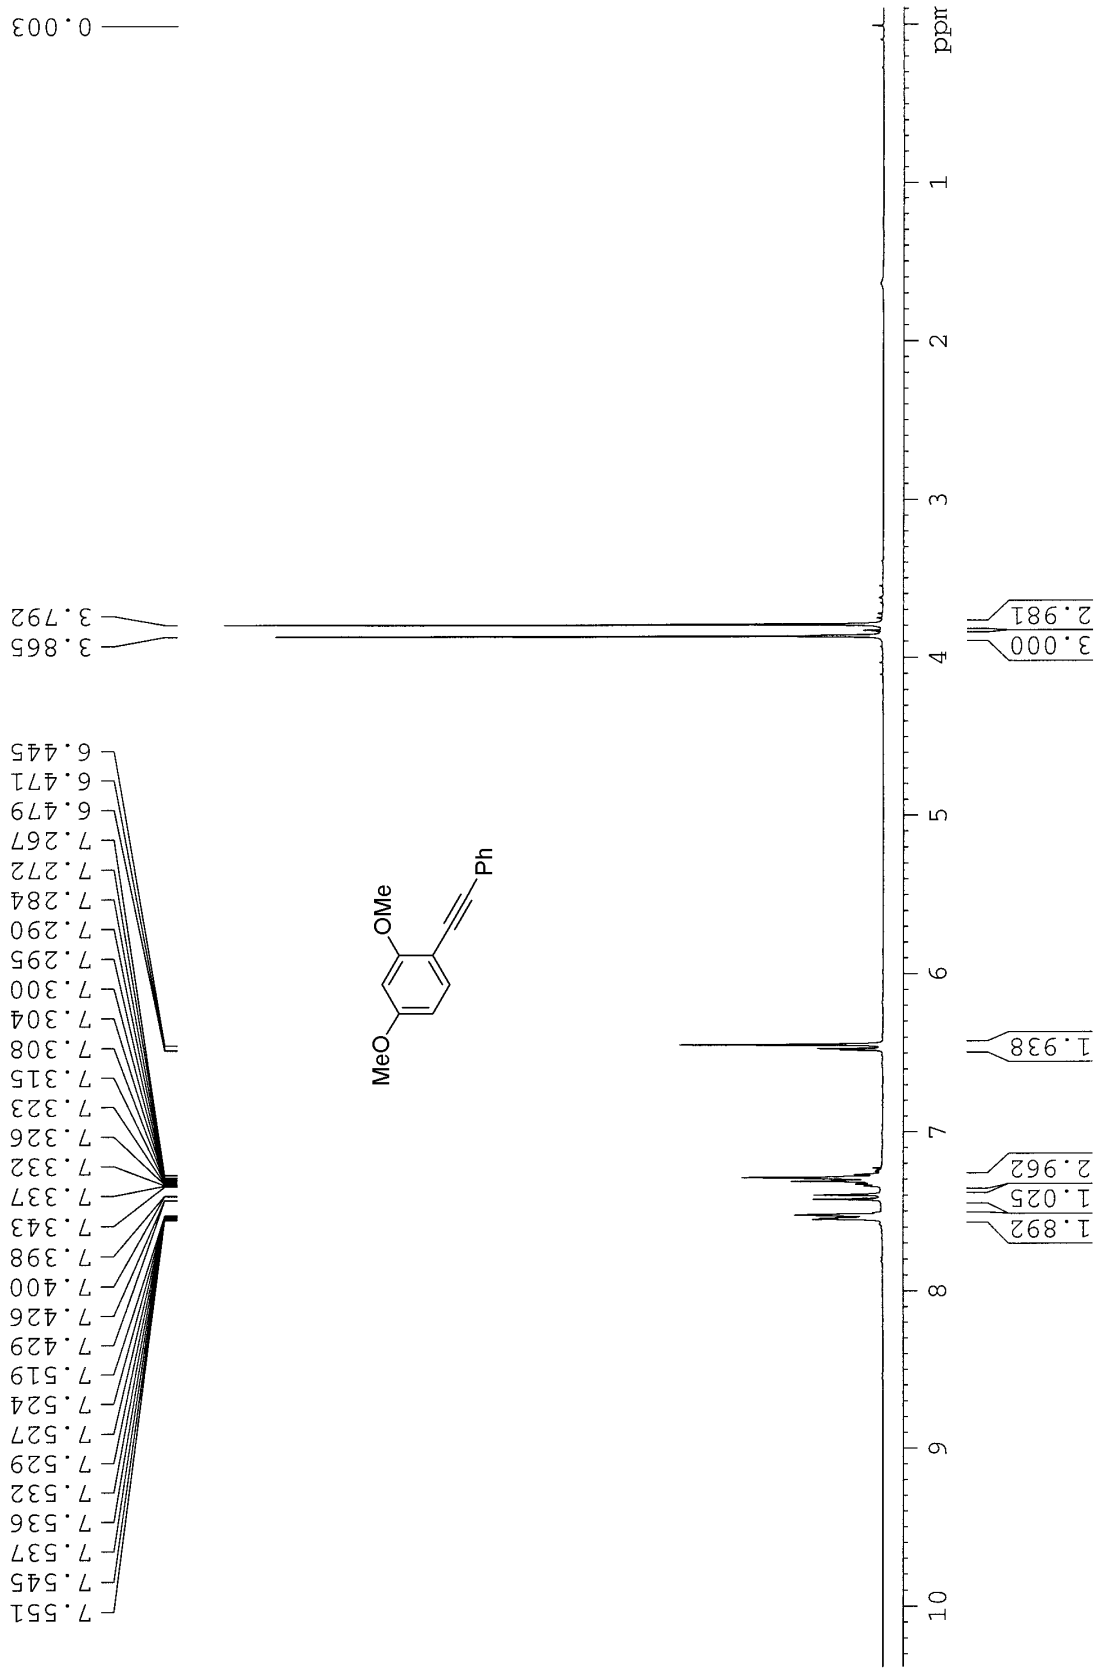

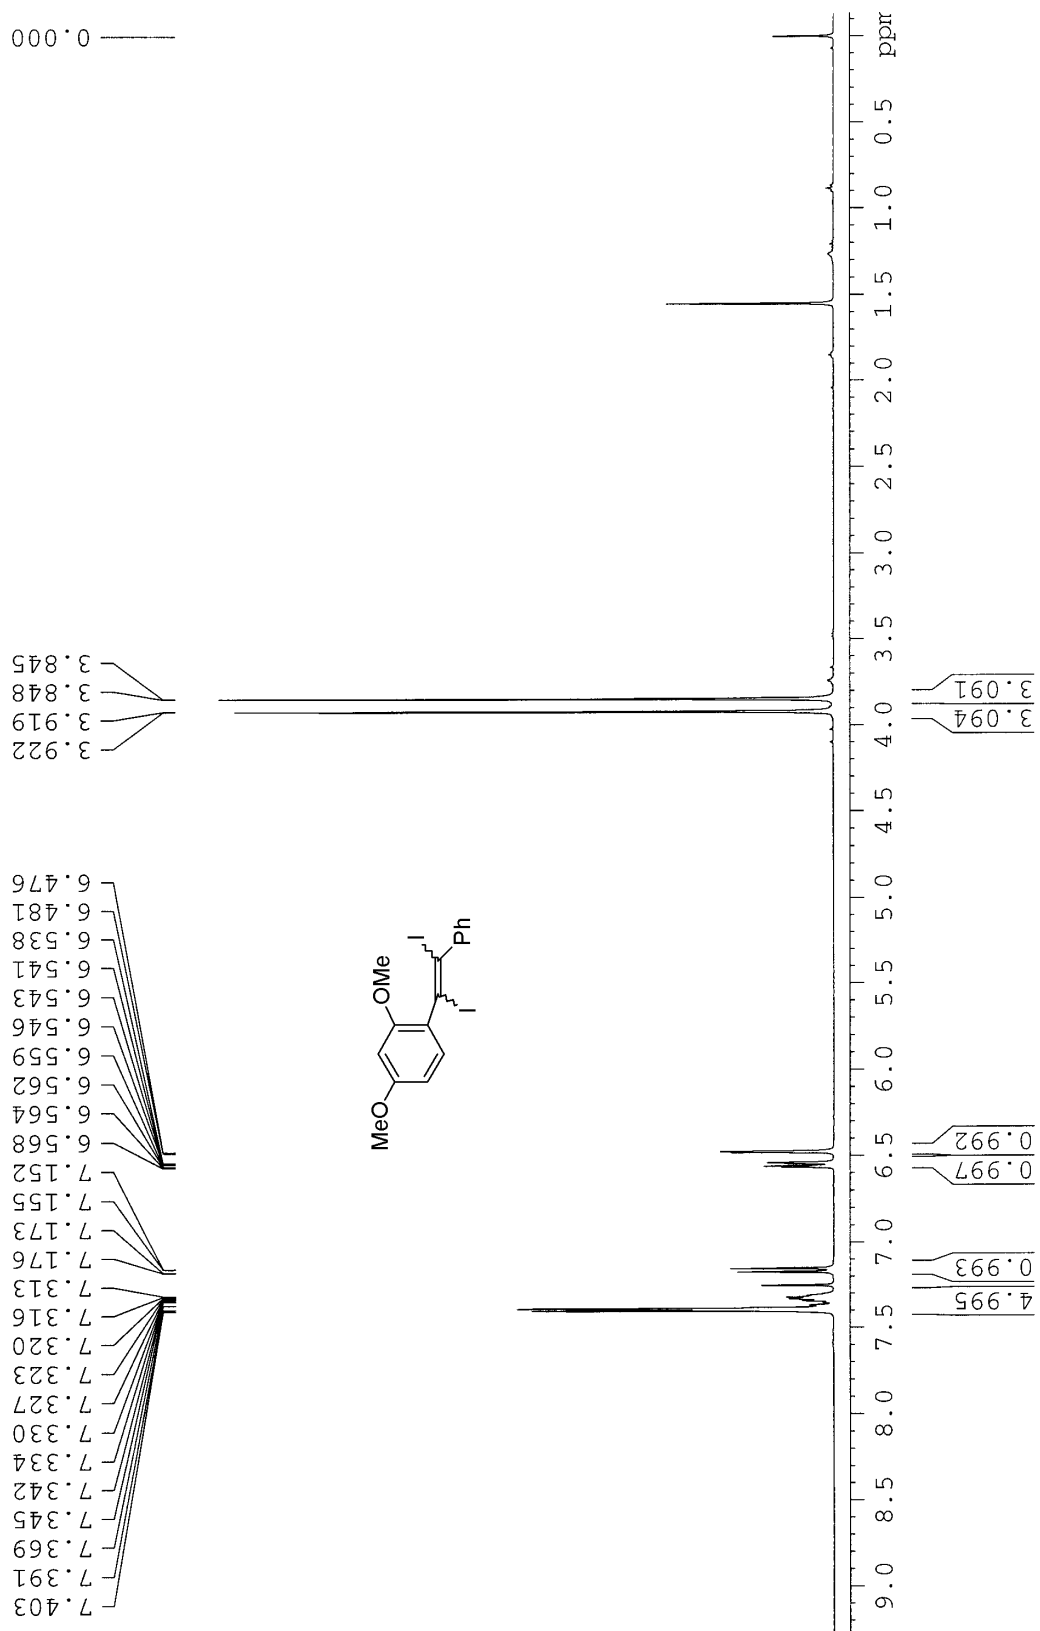



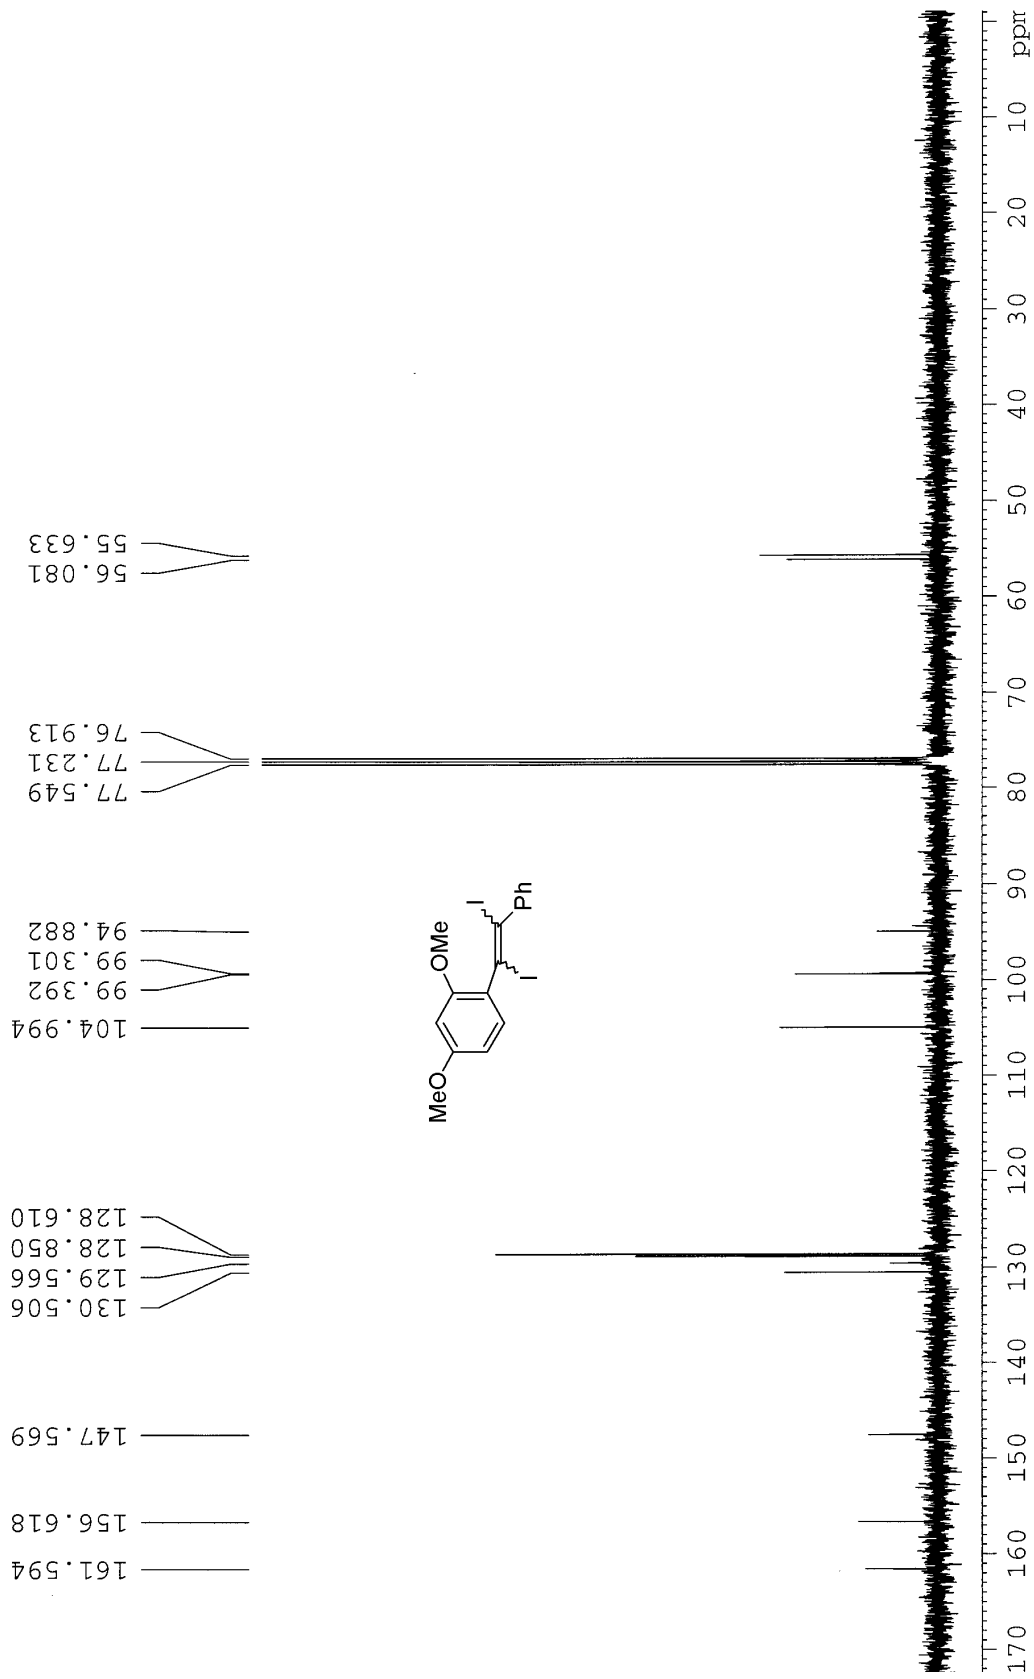

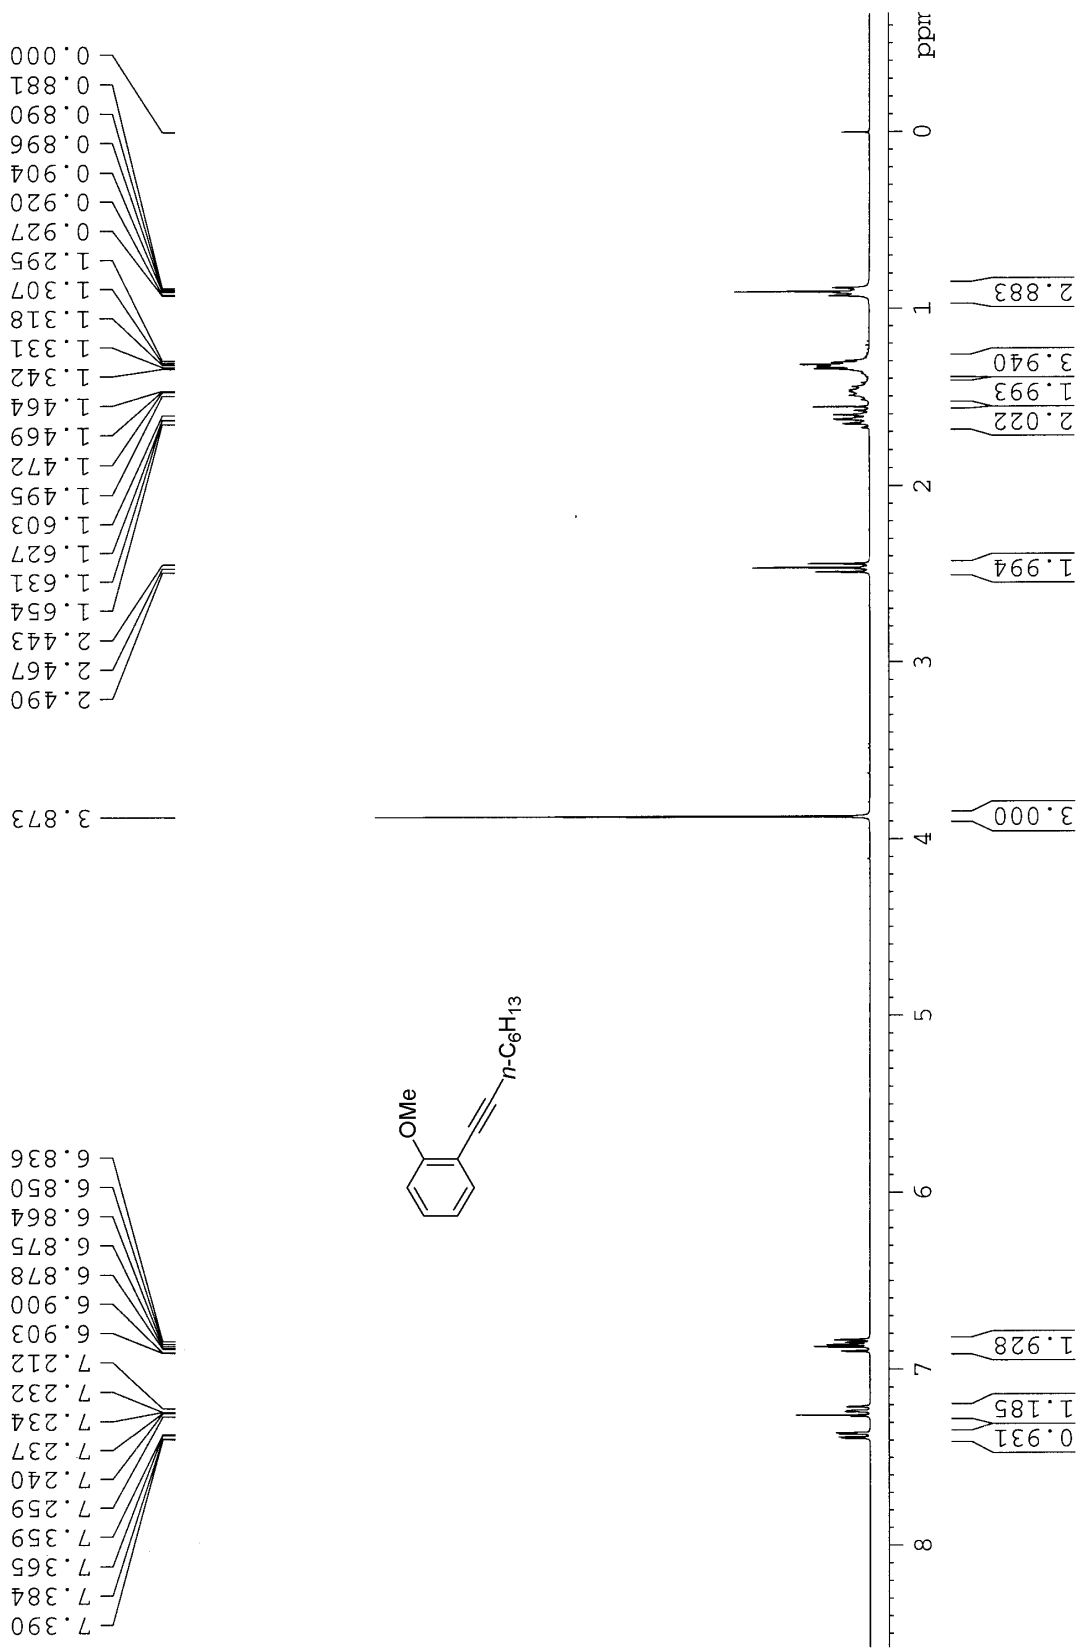

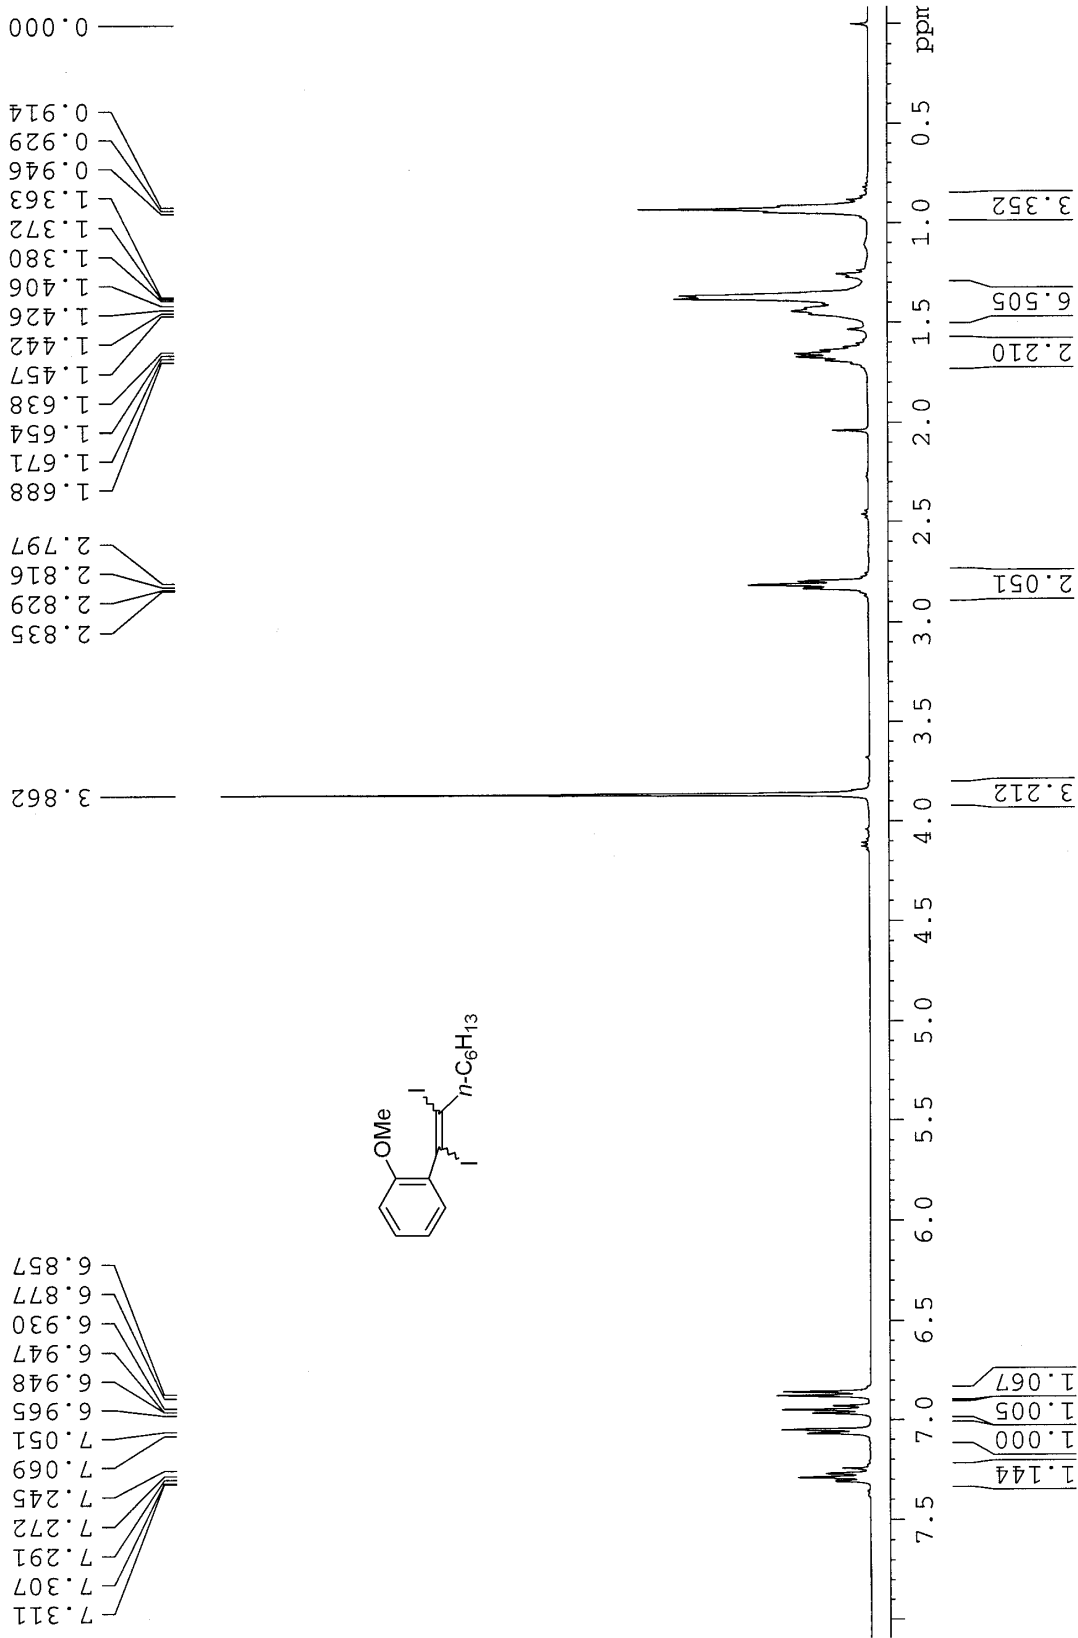

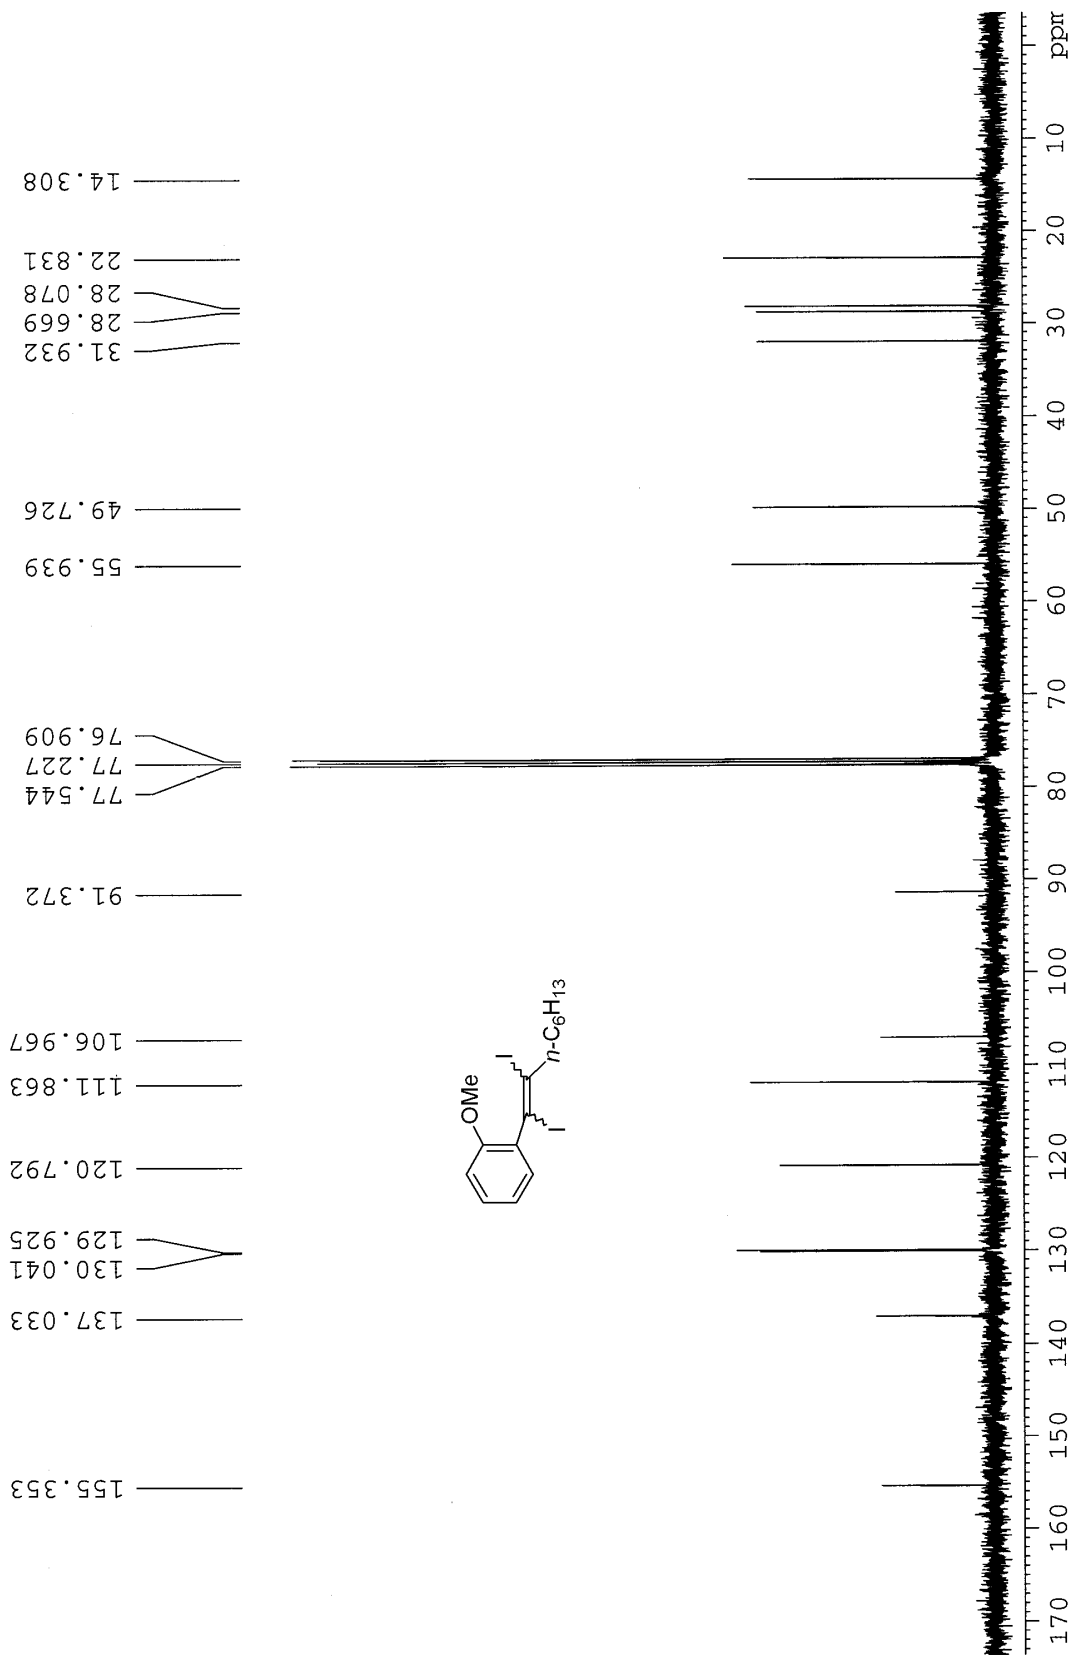

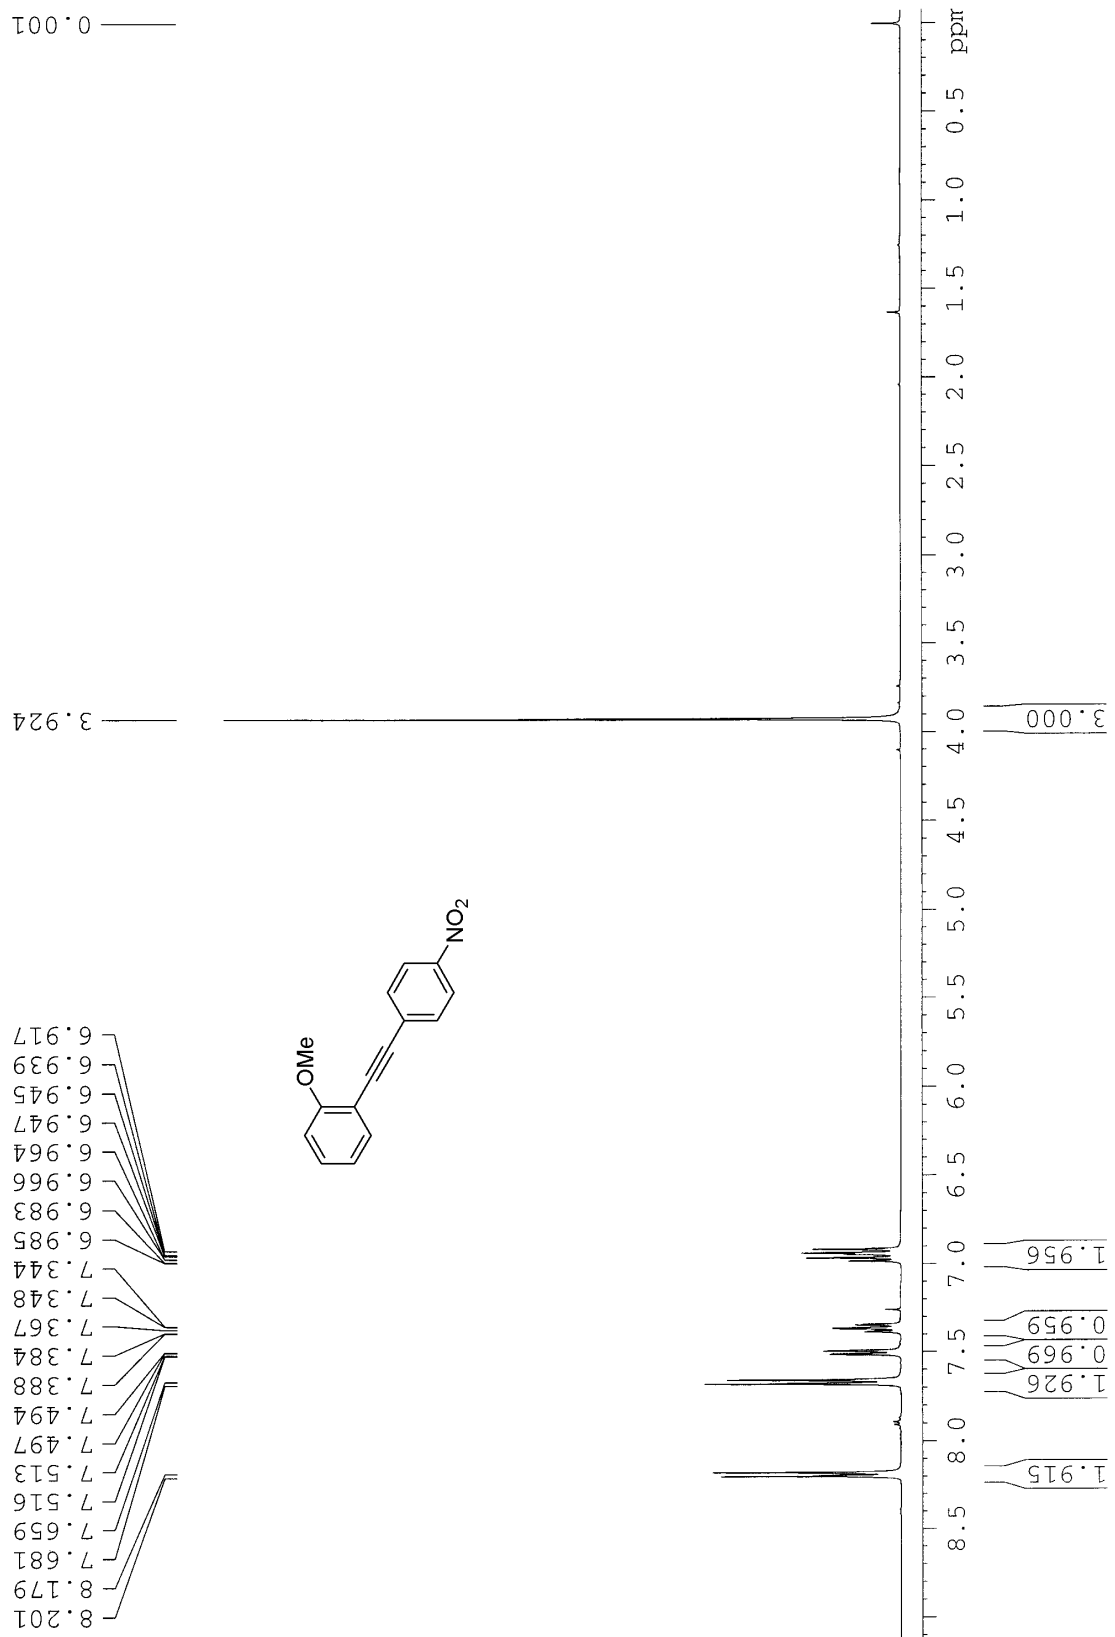

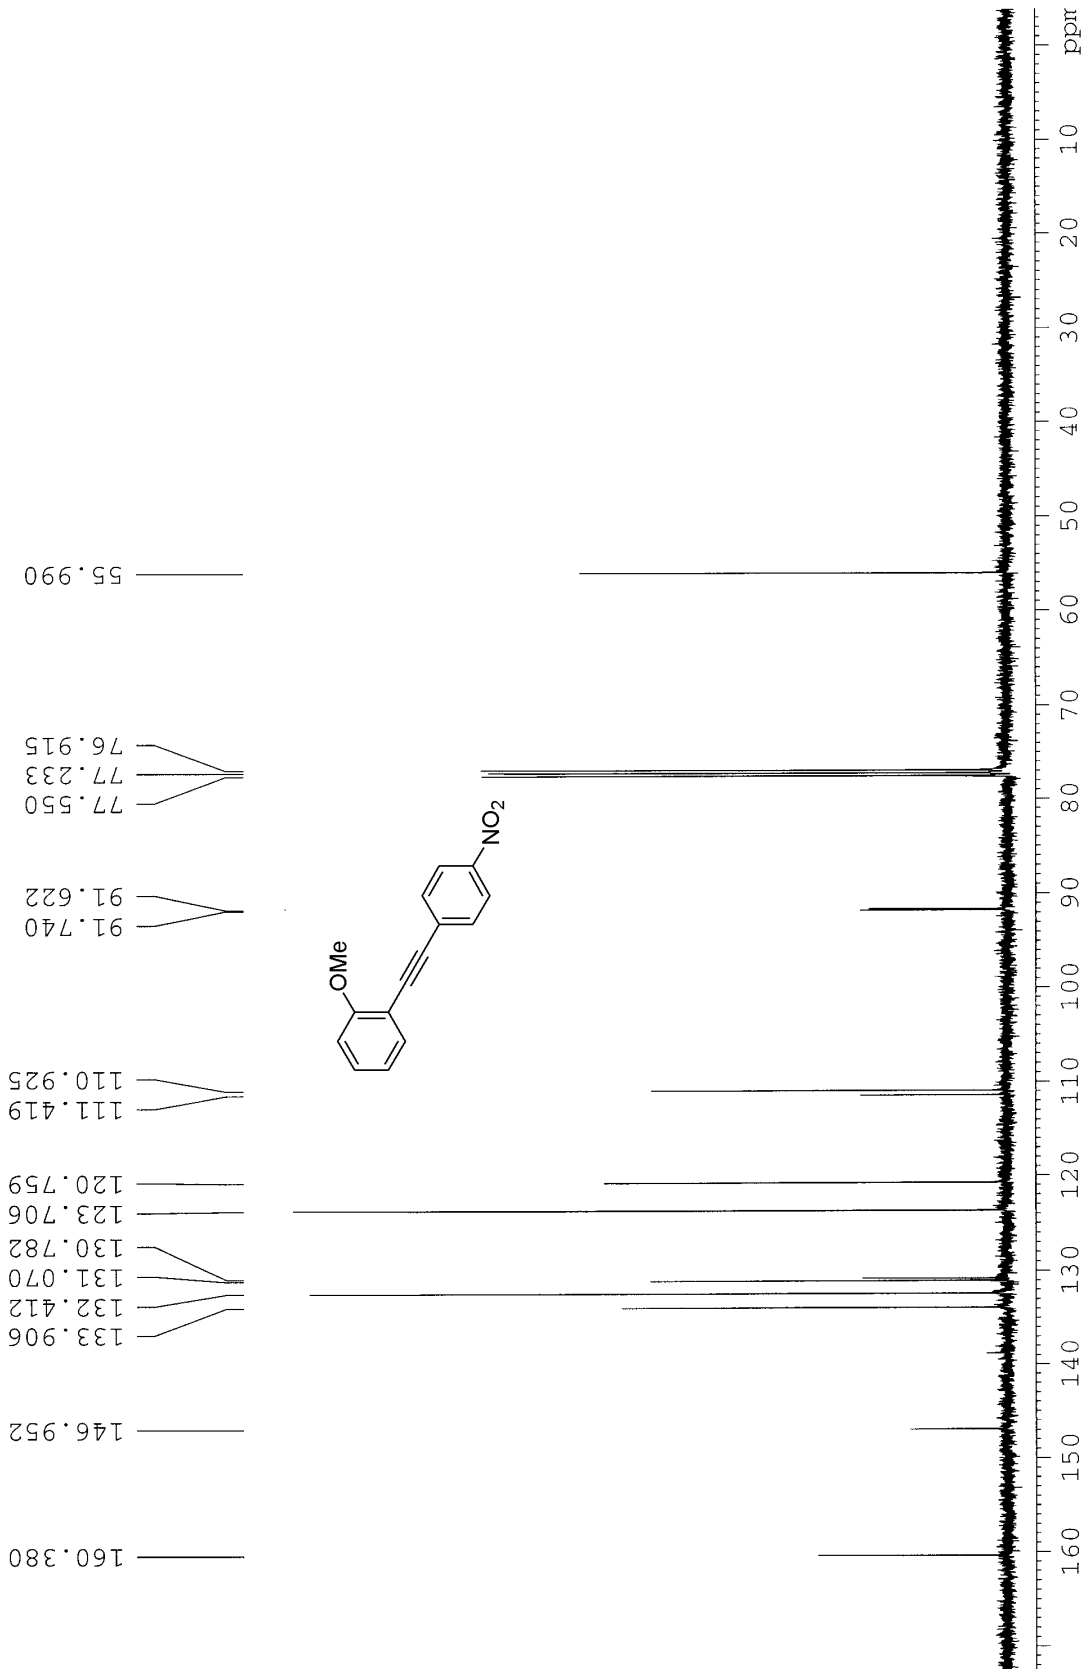

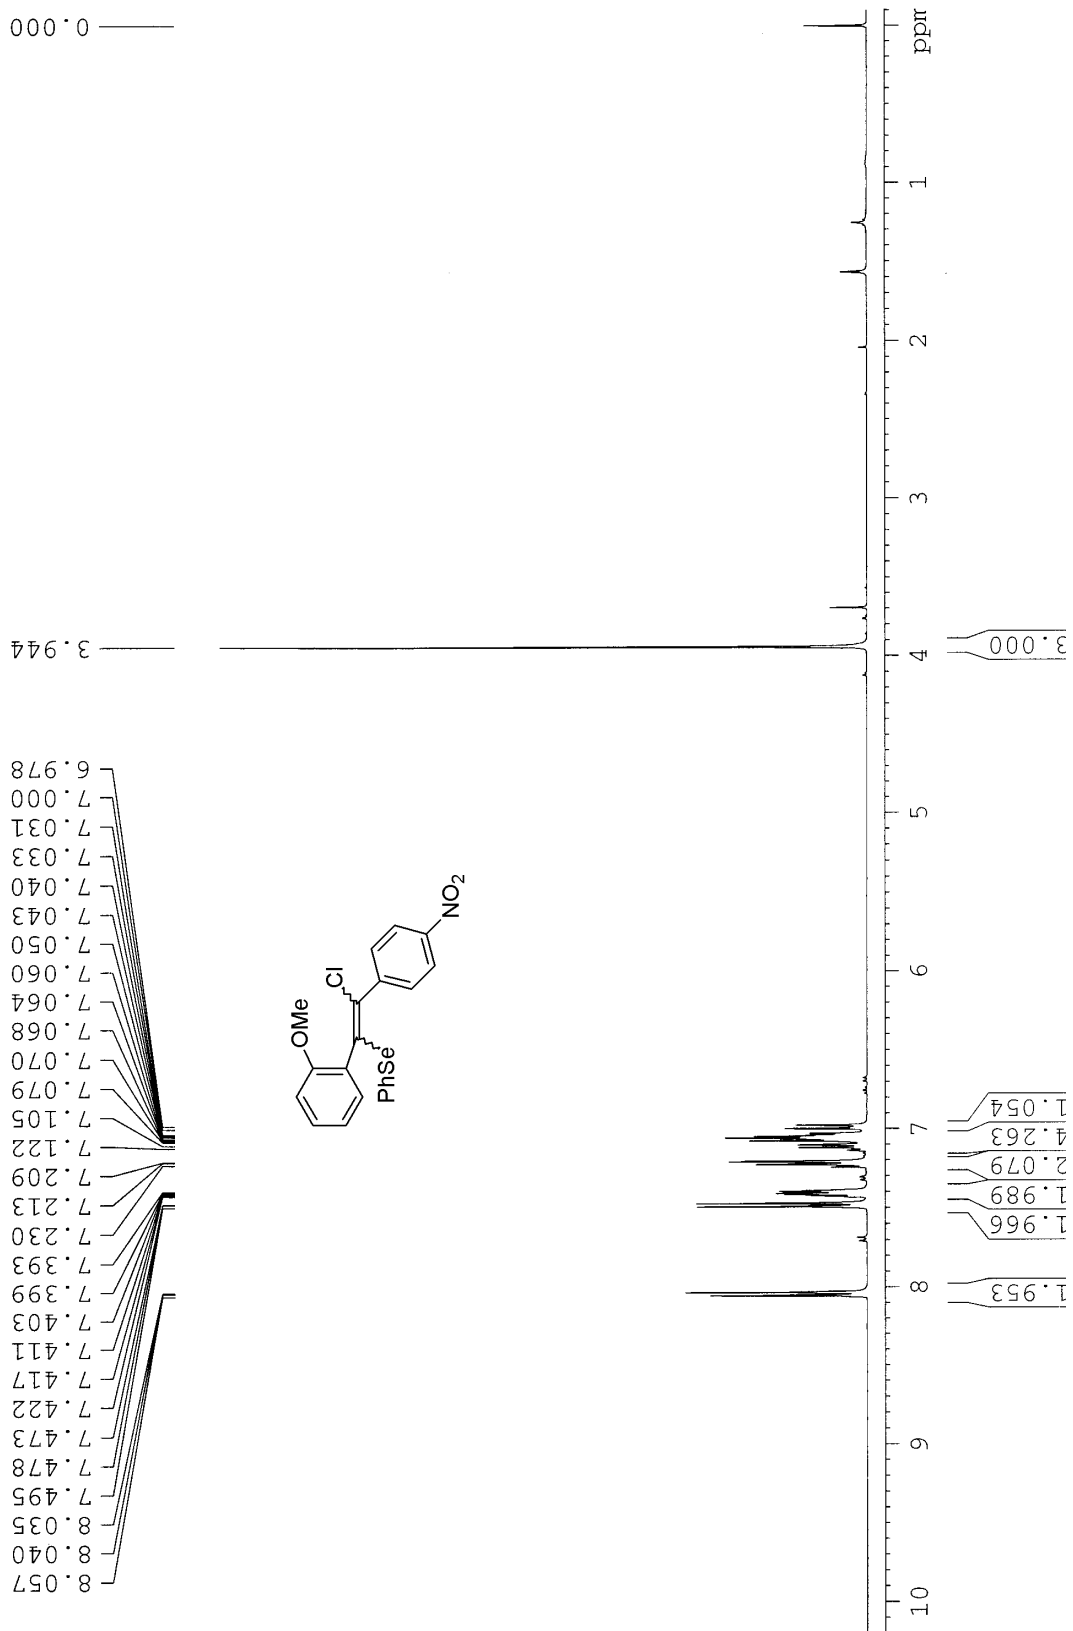

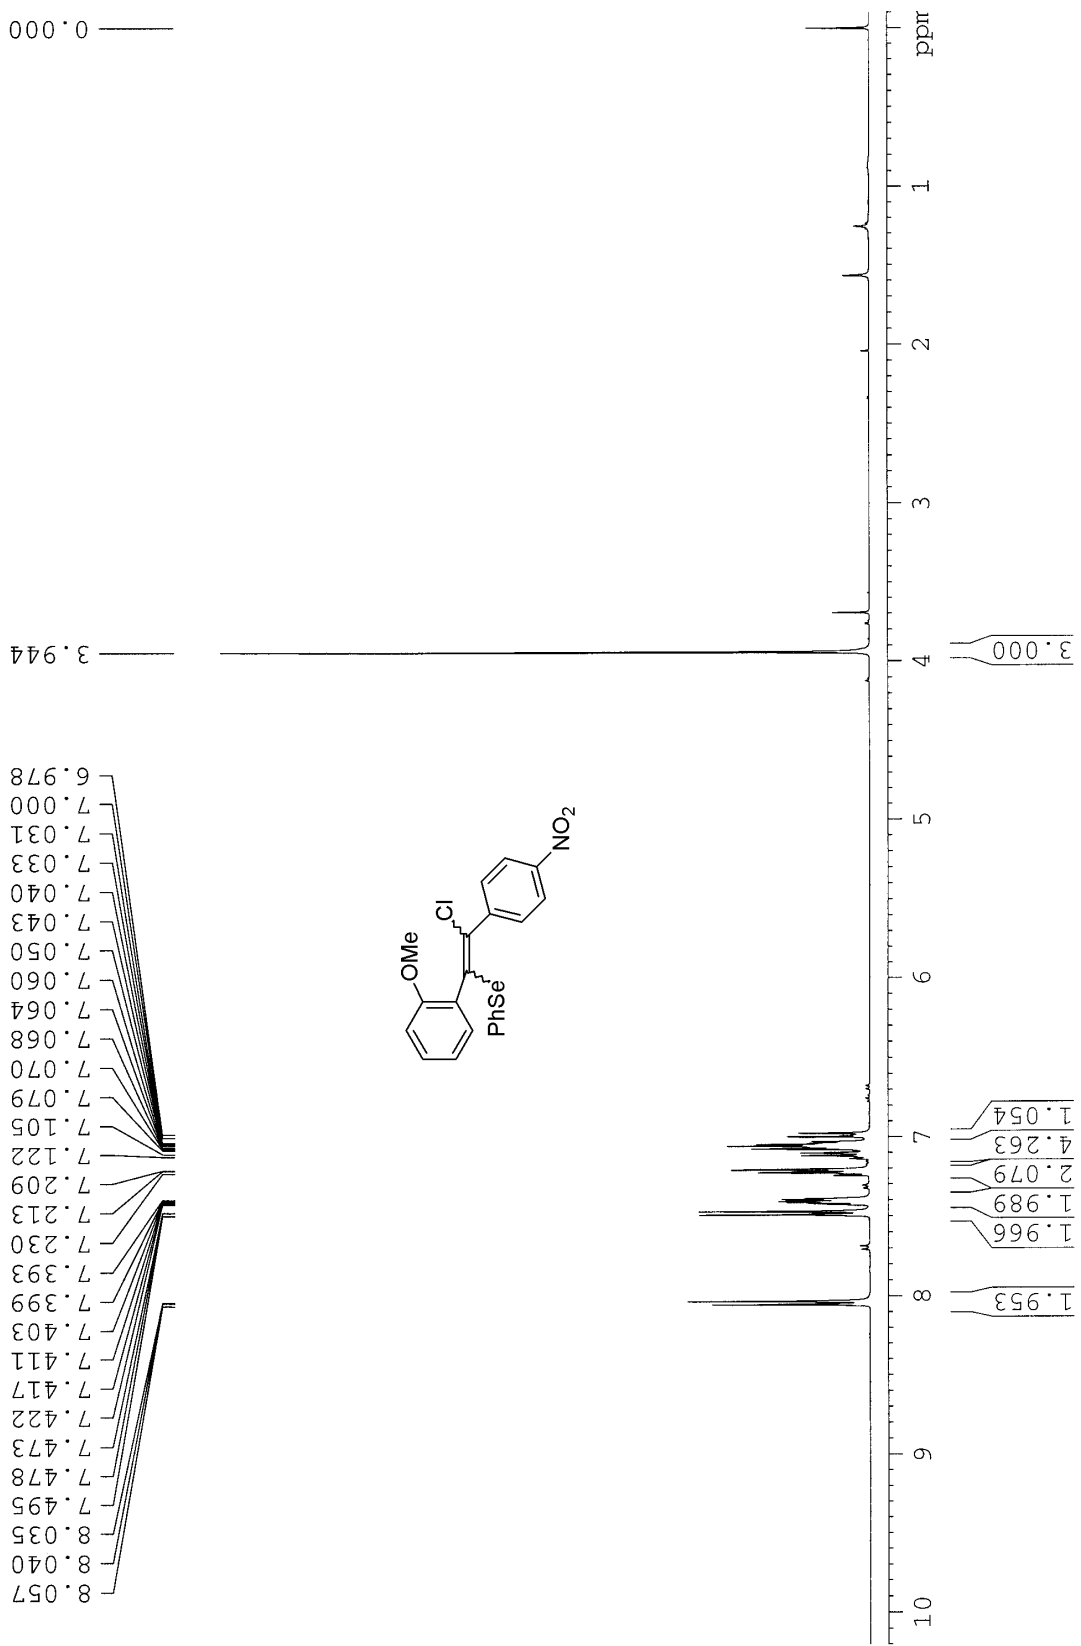



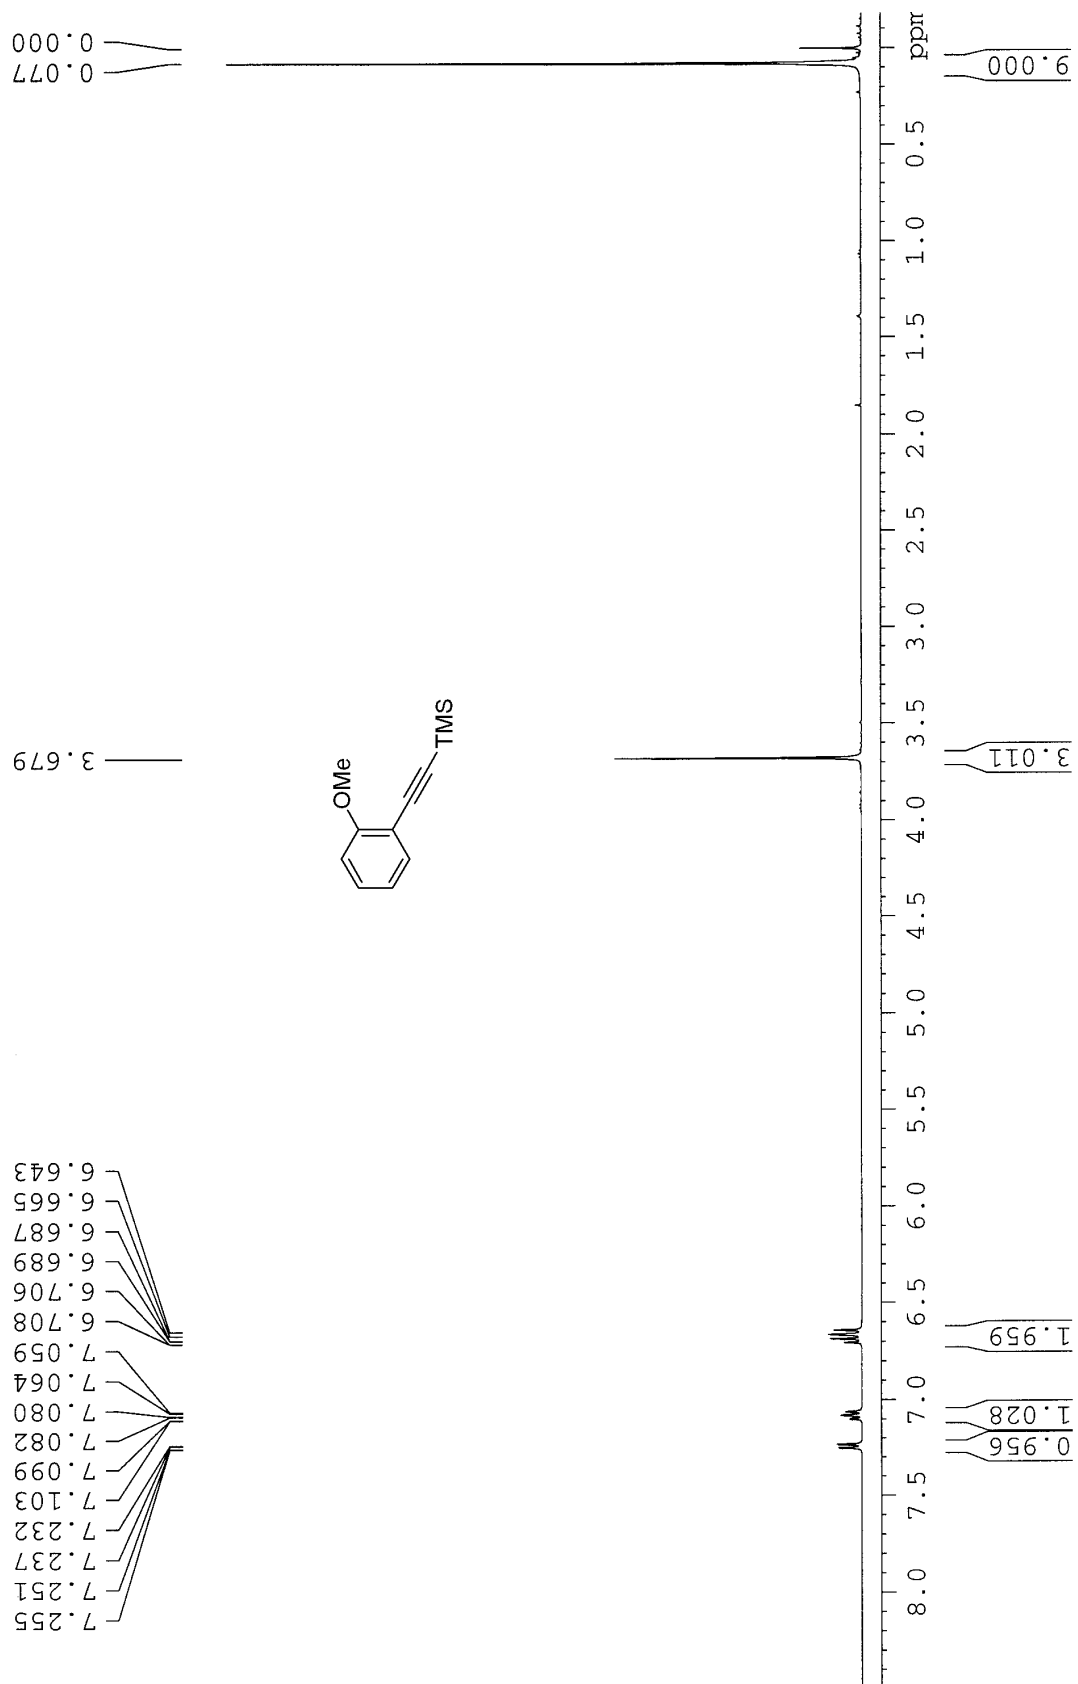

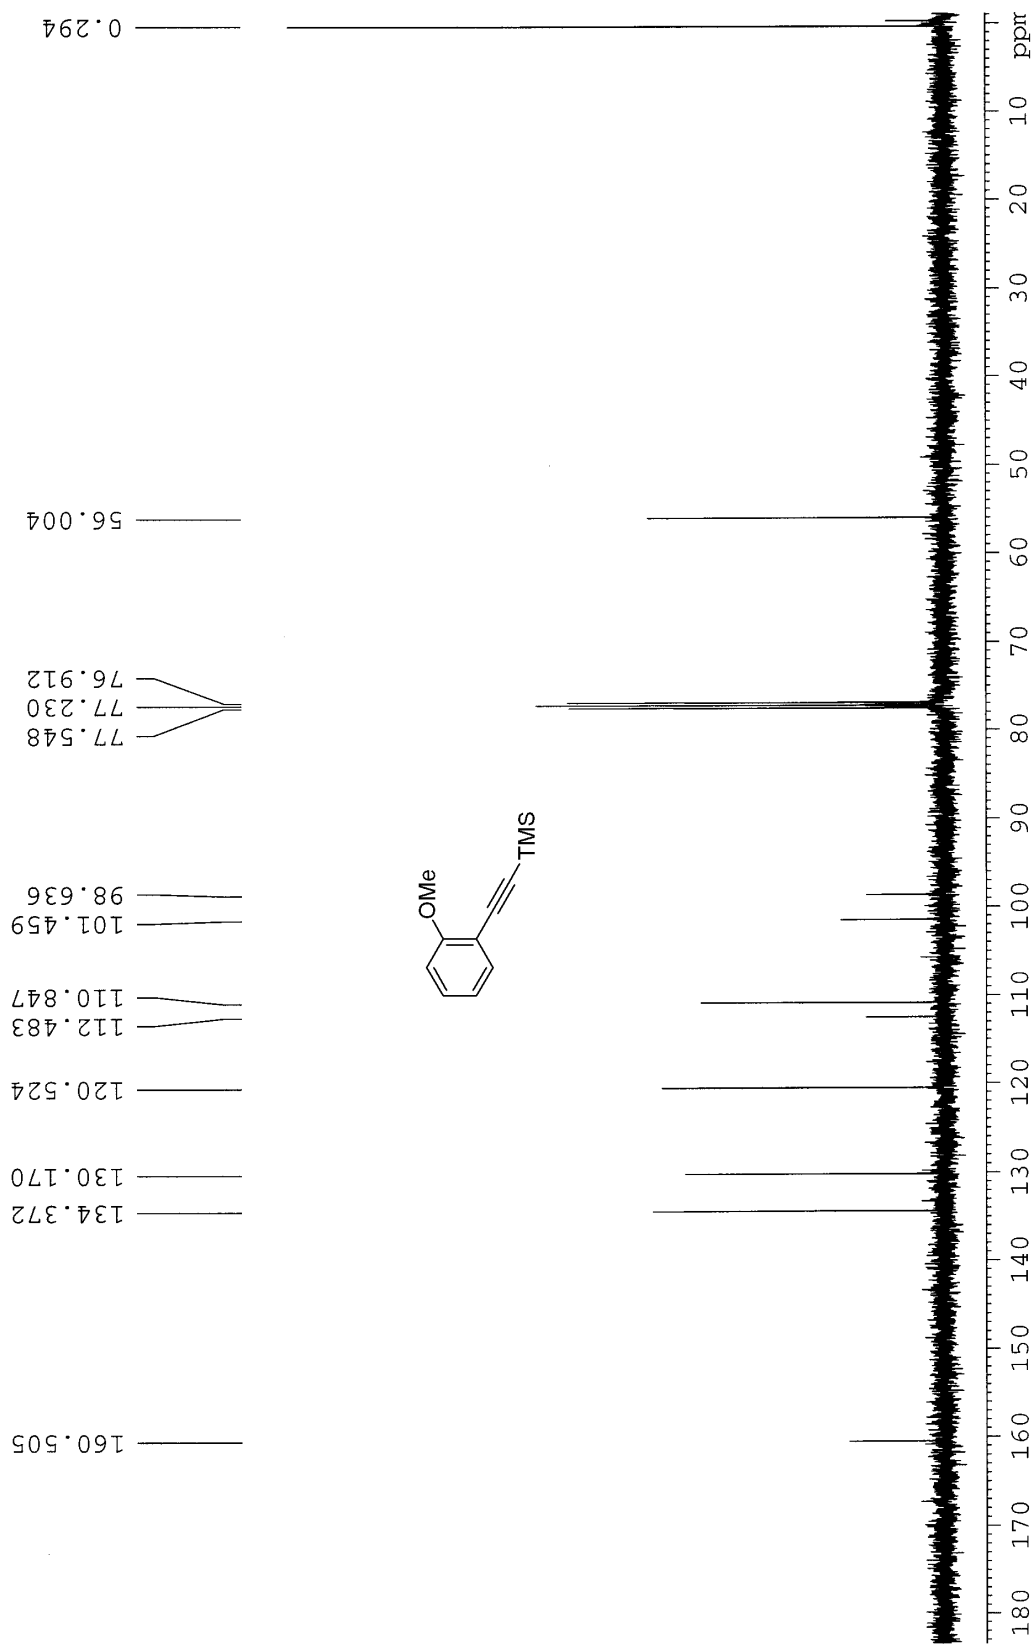

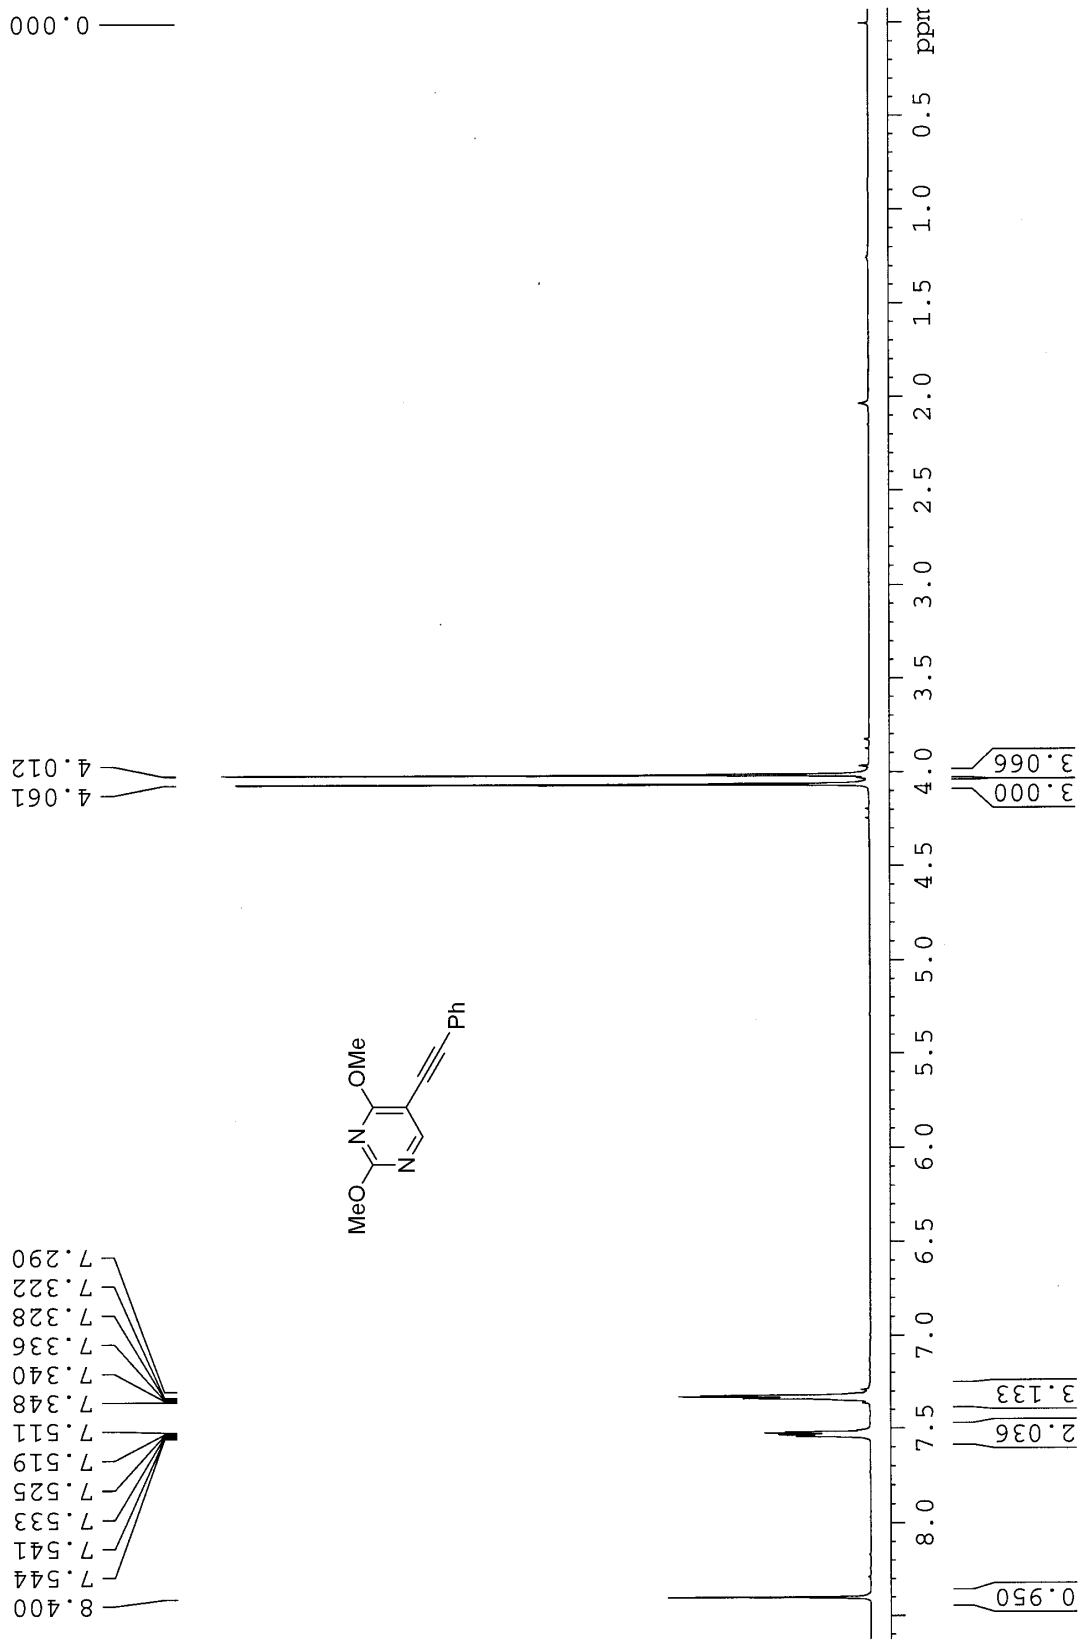

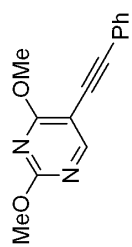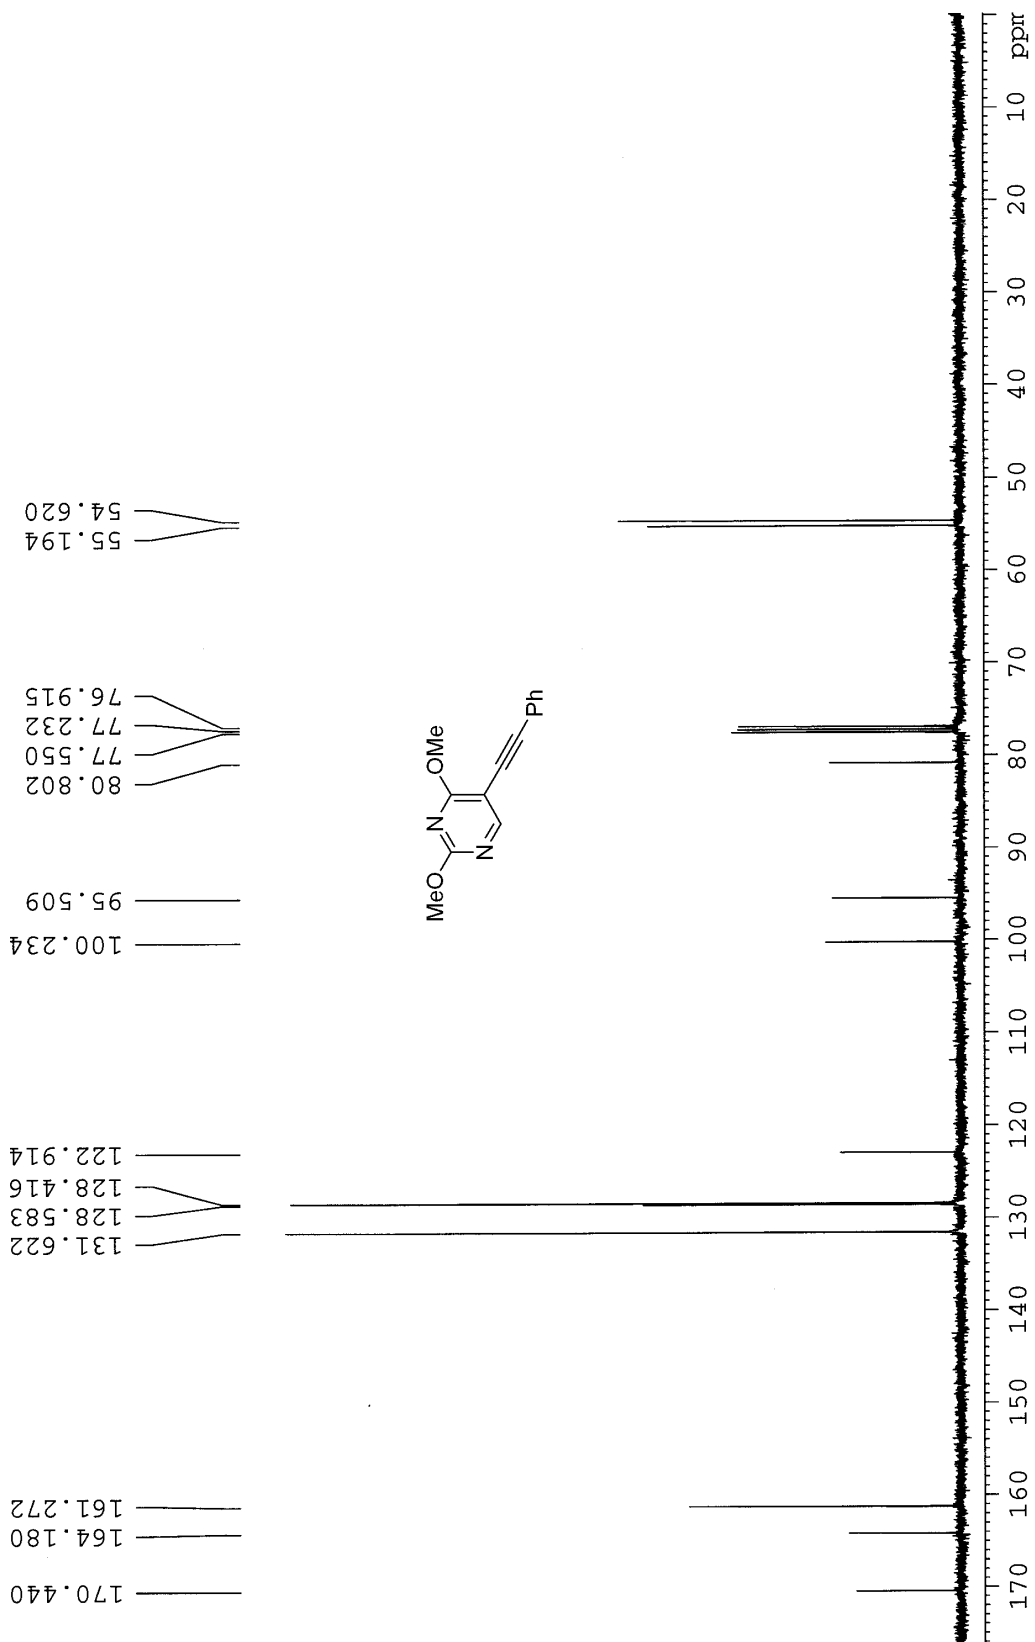

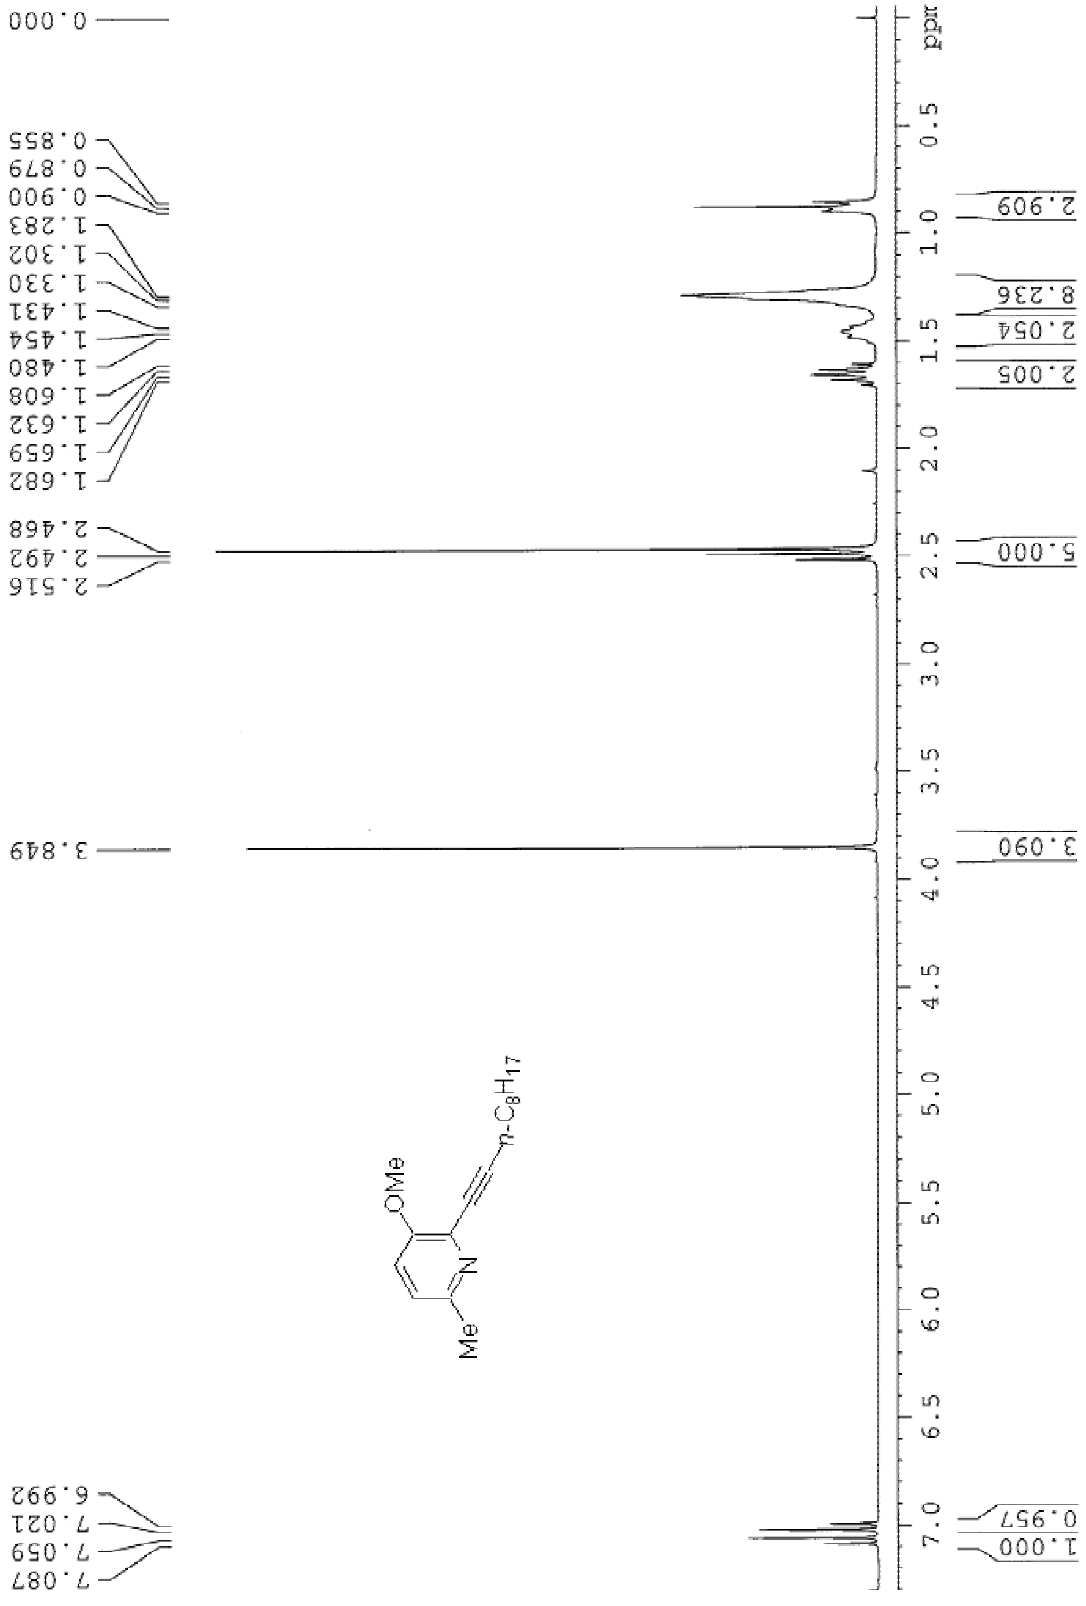

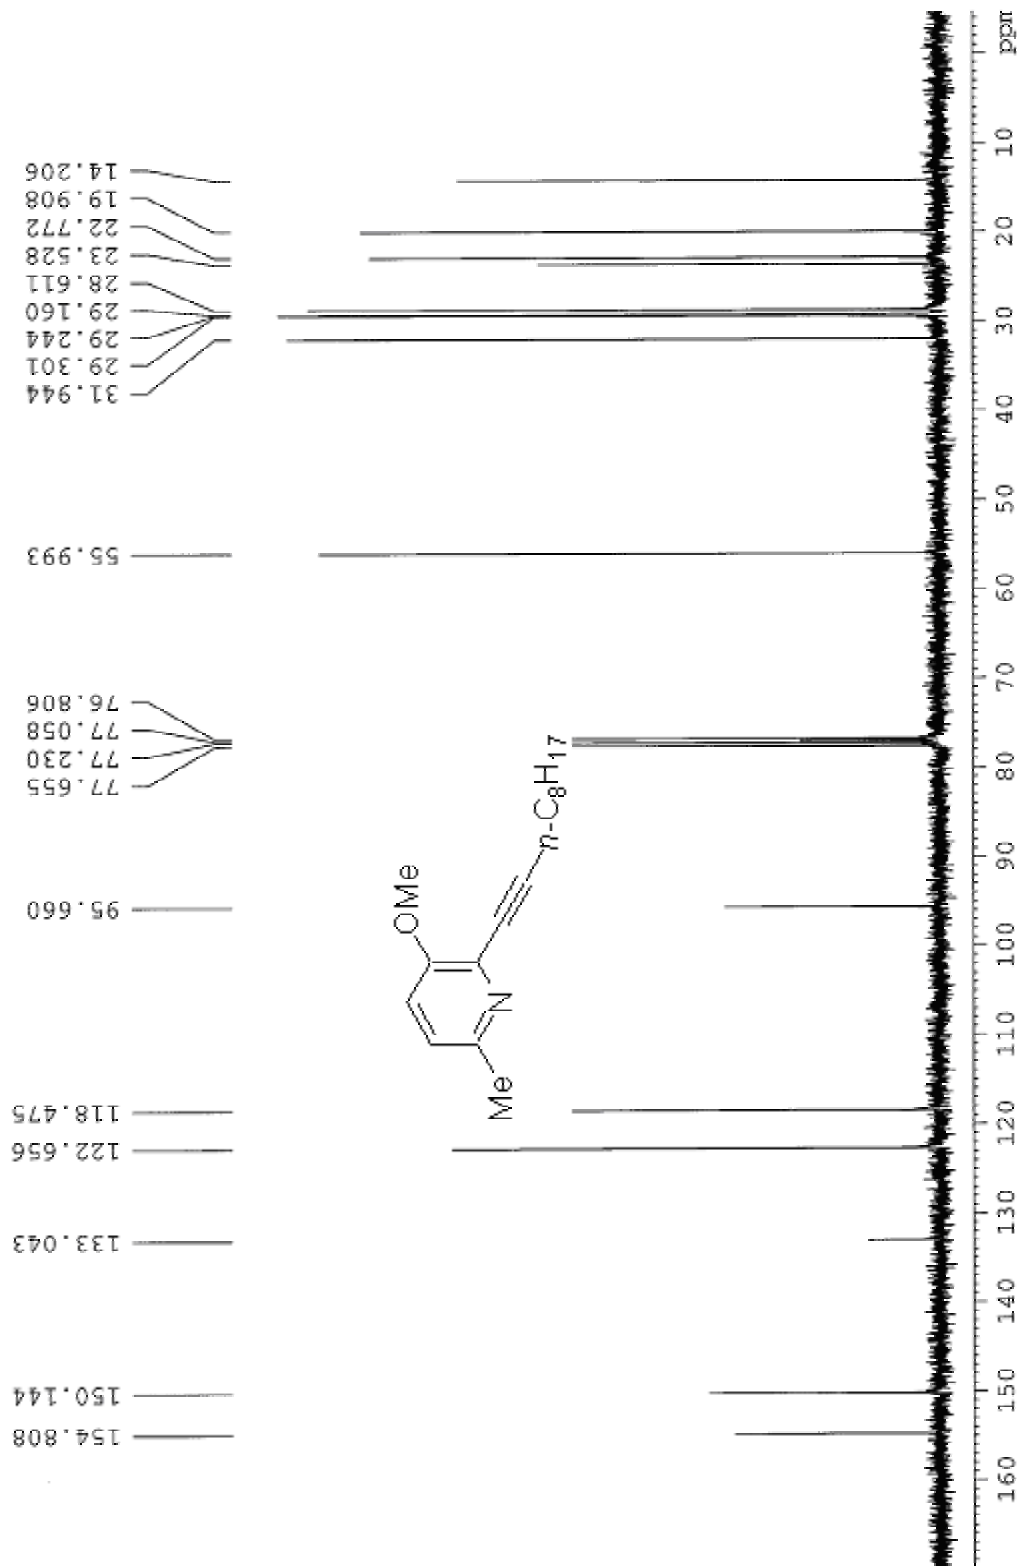

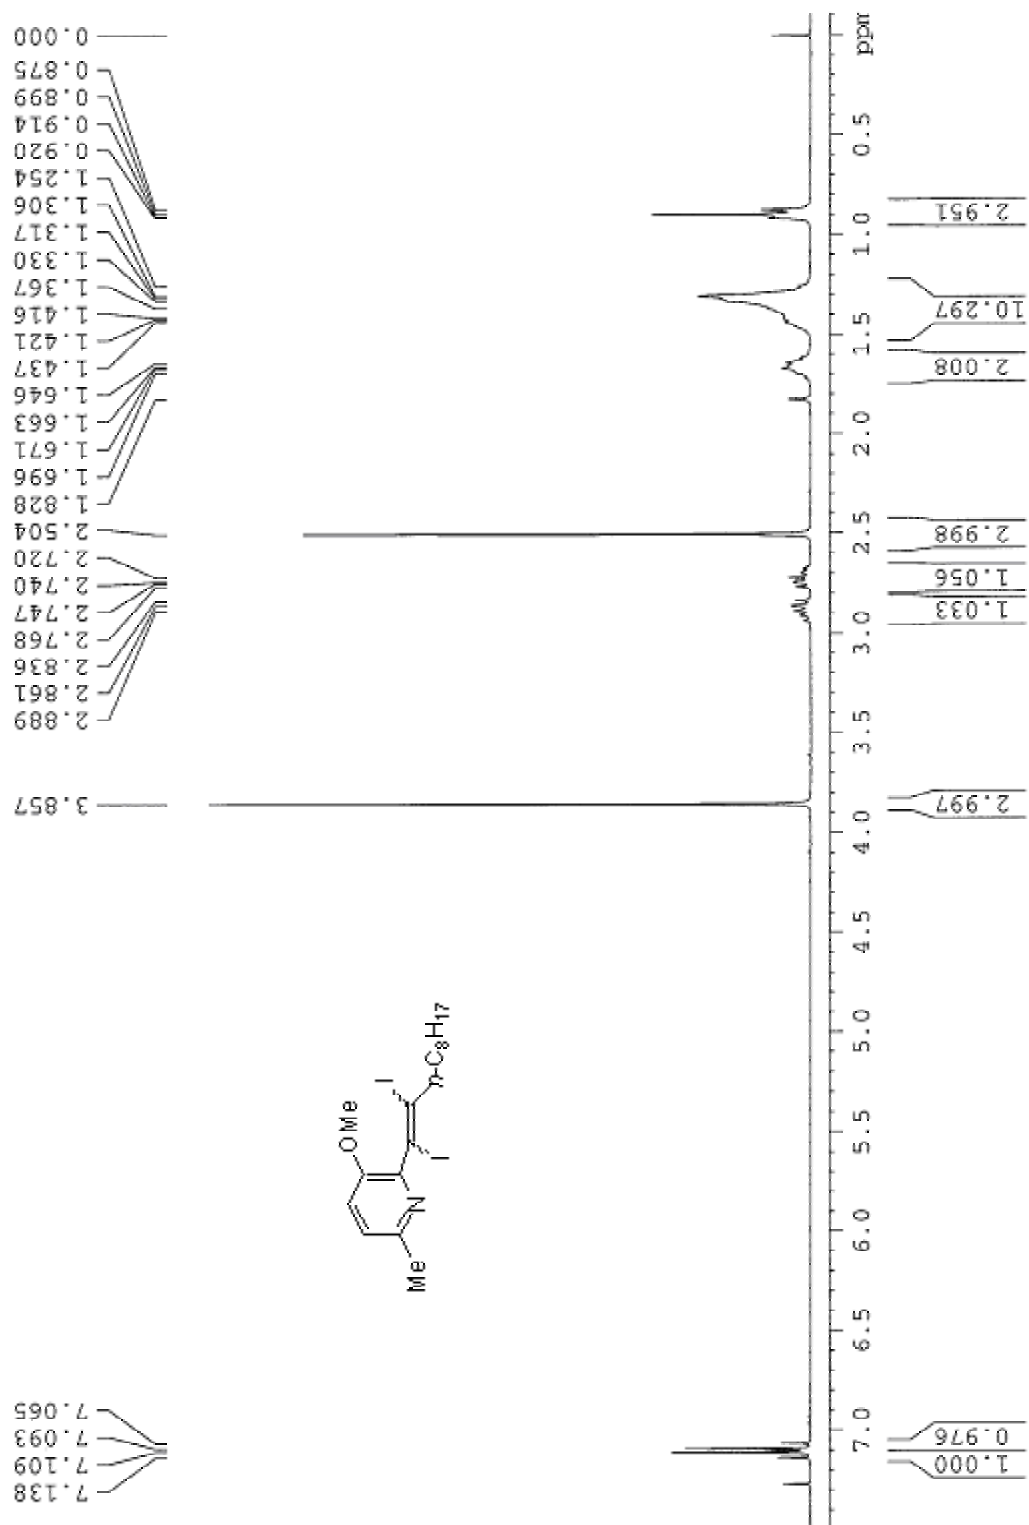

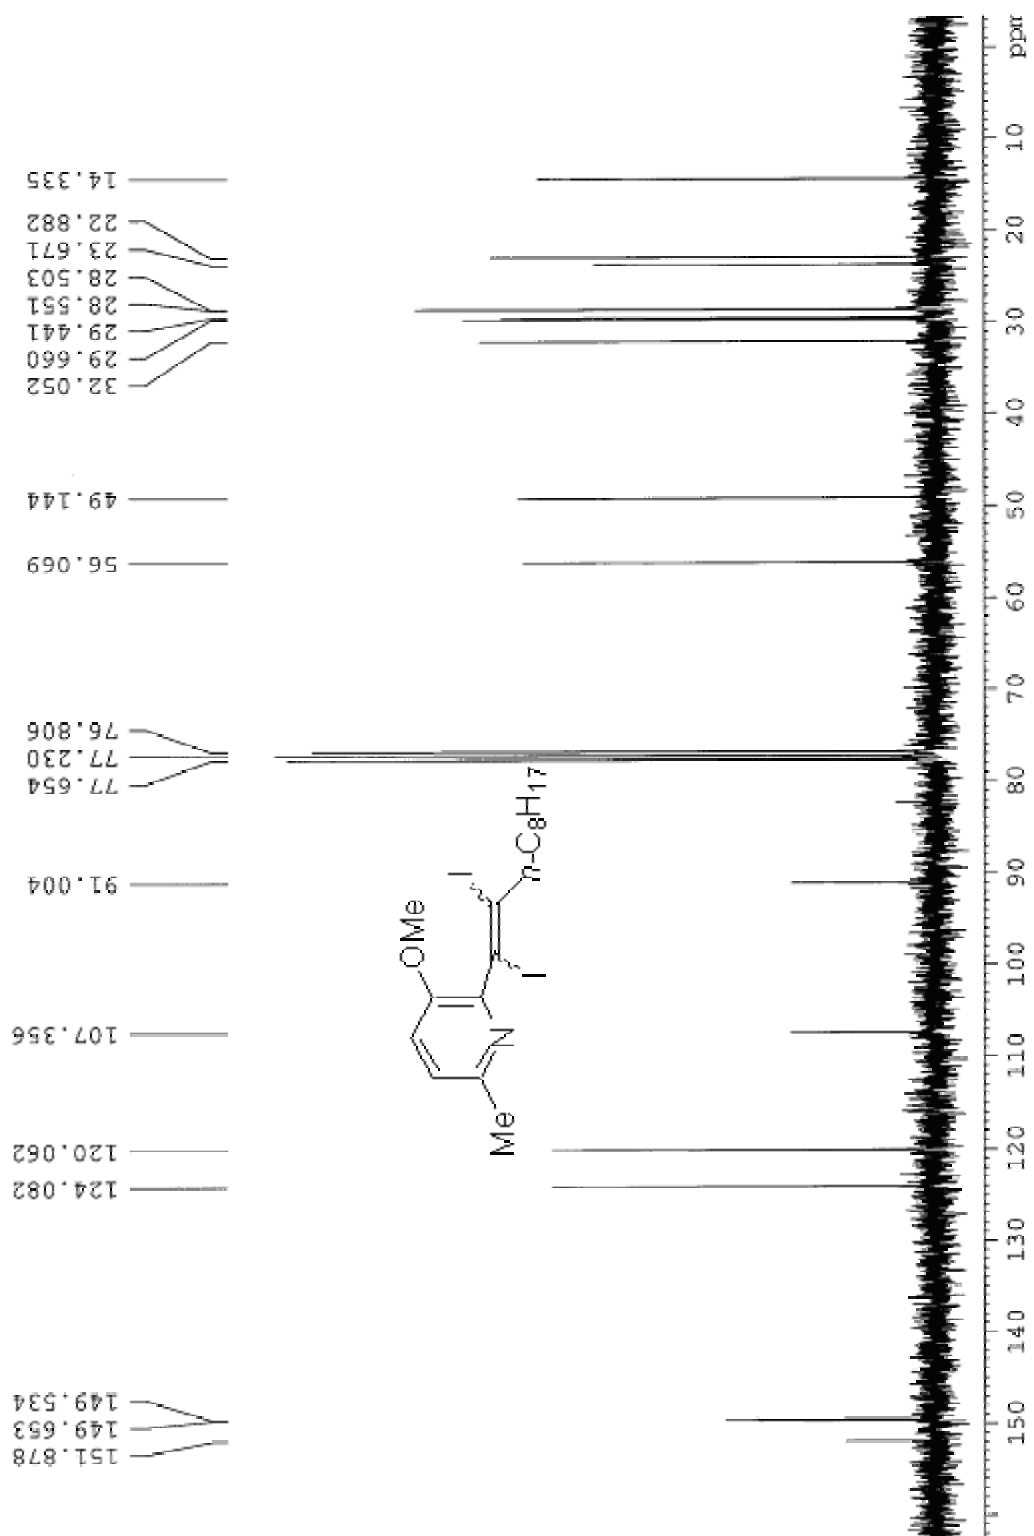

Supplement: NIHMS63117-supplement-1si20050802_12.pdf [file NIHMS63117-supplement-1si20050802_12.pdf]
